# Supplementary material
Source: PubMed Central journal article supplement (PMC3278054)
Supplement: 112300_supp.pdf [file 112300_supp.pdf]

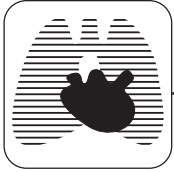

### **VTE, Thrombophilia, Antithrombotic Therapy, and Pregnancy**

**Antithrombotic Therapy and Prevention of Thrombosis, 9th ed:  
American College of Chest Physicians Evidence-Based Clinical  
Practice Guidelines**

*Shannon M. Bates, MDCM; Ian A. Greer, MD, FCCP;  
Saskia Middeldorp, MD, PhD; David L. Veenstra, PharmD, PhD;  
Anne-Marie Prabalos, MD; and Per Olav Vandvik, MD, PhD*

**Table S1—[3.0.1] Systematic Reviews Examining Fetal Safety of Maternal Therapy With Oral Anticoagulants or Aspirin (Methodologic Quality)**

| Study/Year                            | Intervention                                                                                                                                                                                                                                                                                                          | Inclusive Literature Search | Duplicate Study Selection and Data Extraction | List of Studies (Included and Excluded) Provided | Characteristics of Included Studies Provided | Assessment of Quality of Included Studies | Appropriate Methods Used To Combine Study Findings | Assessment of Likelihood of Publication Bias |
|---------------------------------------|-----------------------------------------------------------------------------------------------------------------------------------------------------------------------------------------------------------------------------------------------------------------------------------------------------------------------|-----------------------------|-----------------------------------------------|--------------------------------------------------|----------------------------------------------|-------------------------------------------|----------------------------------------------------|----------------------------------------------|
| Chan et al/2000                       | Studies between 1966 and 1997 examining the use of VKAs and UFH or no anticoagulation in pregnant women with mechanical heart valves                                                                                                                                                                                  | Yes                         | No                                            | No                                               | No                                           | No                                        | Yes                                                | No                                           |
| Hassouna and Allam <sup>2</sup> /2010 | Studies between 2000 and 2009 examining the use of VKAs and UFH or no anticoagulation in pregnant women with mechanical heart valves                                                                                                                                                                                  | No                          | No                                            | No                                               | No                                           | No                                        | Yes                                                | No                                           |
| Askie et al <sup>3</sup> /2007        | Randomized trials (n = 31) comparing antiplatelet agents (low-dose aspirin or dipyridamole) with either placebo or no antiplatelet agent in pregnant women (n = 32,217) for primary prevention of preeclampsia. Aspirin given alone in 27 trials (n = 31,678; 98% of women). Meta-analysis of individual patient data | Yes                         | Yes                                           | Yes                                              | Yes                                          | Yes                                       | Yes                                                | Yes                                          |
| Kozer et al <sup>4</sup> /2002        | Controlled studies (n = 2 case controlled studies, n = 5 cohort studies, n = 1 randomized control study) examining the risk of maternal exposure to aspirin during the first trimester of pregnancy and reported on congenital malformations                                                                          | Yes                         | Yes                                           | Included studies only                            | Yes                                          | No                                        | Yes                                                | No                                           |
| Kozer et al <sup>5</sup> /2003        | Randomized controlled studies (n = 38) examining maternal exposure to aspirin during pregnancy and reporting on seven prespecified outcomes                                                                                                                                                                           | Yes                         | Yes                                           | Included studies only                            | Yes                                          | No                                        | Yes                                                | No                                           |

UFH = unfractionated heparin; VKA = vitamin K antagonist.

**Table S2—[Section 3.0.1] Systematic Reviews Examining Fetal Safety of Maternal Therapy With Oral Anticoagulants and Aspirin (Results)**

| Anticoagulation Regimen                                                            | Spontaneous Abortions | Total Fetal Wastage <sup>a</sup> | Congenital Fetal Anomalies | Fetal or Neonatal Hemorrhage |
|------------------------------------------------------------------------------------|-----------------------|----------------------------------|----------------------------|------------------------------|
| VKAs throughout with or without heparin at term                                    |                       |                                  |                            |                              |
| Chan et al <sup>1</sup> /2000                                                      | 196/792 (24.7)        | 266/792 (33.6)                   | 35/549 (6.4)               |                              |
| Hassouna and Allam <sup>2</sup> /2010                                              | 194/833 (23.3)        | 274/833 (32.9)                   | 21/559 (3.7)               | Not reported                 |
| Heparin in first trimester, then VKAs throughout with or without heparin near term |                       |                                  |                            |                              |
| Heparin use at/before 6 wk                                                         |                       |                                  |                            |                              |
| Chan et al <sup>1</sup> /2000                                                      | 19/129 (14.7)         | 21/129 (16.3)                    | 0/108 (0.0)                | Not reported                 |
| Heparin use after 6 wk                                                             |                       |                                  |                            |                              |
| Chan et al <sup>1</sup> /2000                                                      | 19/56 (33.9)          | 20/56 (35.7)                     | 4/36 (11.1)                | Not reported                 |
| Heparin use at unknown time in first trimester                                     |                       |                                  |                            |                              |
| Chan et al <sup>1</sup> /2000                                                      | 19/45 (42.2)          | 20/45 (44.4)                     | 2/30 (6.7)                 | Not reported                 |
| Hassouna and Allam <sup>2</sup> /2010                                              | 42/322 (13.0)         | 64/322 (19.9)                    | 1/258 (0.4)                | Not reported                 |
| Adjusted-dose heparin                                                              |                       |                                  |                            |                              |
| Chan et al <sup>1</sup> /2000                                                      | 4/16 (25.0)           | 7/16 (43.8)                      | 0/12 (0.0)                 | Not reported                 |
| Low-dose heparin                                                                   |                       |                                  |                            |                              |
| Chan et al <sup>1</sup> /2000                                                      | 1/5 (20.0)            | 2/5 (40.0)                       | 0/5 (0.0)                  | Not reported                 |
| Regimen not specified                                                              |                       |                                  |                            |                              |
| Hassouna and Allam <sup>2</sup> /2010                                              | 31/157 (21.6)         | 61/157 (38.8)                    | 0/96 (0.0)                 | Not reported                 |
| No anticoagulation                                                                 |                       |                                  |                            |                              |
| Nothing                                                                            |                       |                                  |                            |                              |
| Chan et al <sup>1</sup> /2000                                                      | 2/35 (5.7)            | 7/35 (20.0)                      | 2/33 (6.1)                 | Not reported                 |
| Antiplatelet agent                                                                 |                       |                                  |                            |                              |
| Chan et al <sup>1</sup> /2000                                                      | 8/67 (11.9)           | 13/67 (19.4)                     | 1/59 (1.7)                 | Not reported                 |
| Nothing or antiplatelet agent                                                      |                       |                                  |                            |                              |
| Hassouna and Allam <sup>2</sup> /2010                                              | 2/31 (6.4)            | 4/31 (12.9)                      | 0/27 (0.0)                 | Not reported                 |

Data are presented as n/N (%). See Table S1 legend for expansion of abbreviation.

<sup>a</sup>Wastage due to abortions, stillbirths, and neonatal deaths.

**Table S3—[Section 3.0.1] Systematic Reviews of the Effect of Maternal Aspirin Use on Antithrombotic Therapy on Fetal Outcomes (Clinical Description and Results)**

| Reference                      | Intervention                                                                                     | Neonatal Hemorrhage                                                        | Pregnancy Loss                                                                                                                                                                                                                                                                                                                      | Congenital Malformation                                                                                                                                                                                                                                                | Developmental Delay | Small for Gestational Age                                                  |
|--------------------------------|--------------------------------------------------------------------------------------------------|----------------------------------------------------------------------------|-------------------------------------------------------------------------------------------------------------------------------------------------------------------------------------------------------------------------------------------------------------------------------------------------------------------------------------|------------------------------------------------------------------------------------------------------------------------------------------------------------------------------------------------------------------------------------------------------------------------|---------------------|----------------------------------------------------------------------------|
| Askie et al <sup>9</sup> /2007 | Maternal aspirin (98%) and dipyridamole vs placebo or no antiplatelet agent                      | Antiplatelet: 287/14,583; control: 308/14,563; RR 0.93 (95% CI, 0.80-1.09) | Fetal/neonatal death antiplatelet: 484/15,412; control: 111/15,523; RR 0.90 (95% CI, 0.83-0.98)                                                                                                                                                                                                                                     | Not reported                                                                                                                                                                                                                                                           | Not reported        | Antiplatelet: 568/10,772; Control: 624/10,654; RR 0.90 (95% CI, 0.81-1.01) |
| Kozer et al <sup>8</sup> /2002 | Maternal aspirin use during the first trimester vs maternal use of other drugs or no other drugs | Not reported                                                               | Not reported                                                                                                                                                                                                                                                                                                                        | Overall: aspirin, 888/15,138; control, 1,935/49,890; OR 1.33 (95% CI, 0.94-1.89)<br>Congenital heart defects: aspirin, 580/17,197; control, 2,406/44,774; OR 1.03 (95% CI, 0.94-1.13)<br>Gastroschisis: aspirin, 52/261 control, 523/2,449 OR 2.37 (95% CI, 1.44-3.88) | Not reported        | Not reported                                                               |
| Kozer et al <sup>8</sup> /2003 | Maternal aspirin use during pregnancy vs placebo or no aspirin                                   | Aspirin: 238/13,003; control: 231/13,055; RR 1.03 (95% CI, 0.86-1.25)      | Miscarriage (exposure in first or second trimester): aspirin, 111/7,615; control, 122/7,615; RR 0.92 (95% CI, 0.71-1.19)<br>Miscarriage (exposure in the first trimester): aspirin, 13/53; control, 10/53; RR 1.3 (95% CI, 0.63-2.69)<br>Perinatal mortality: aspirin, 406/14,130; control, 441/14,078; RR 0.92 (95% CI, 0.81-1.05) | Not reported                                                                                                                                                                                                                                                           | Not reported        | Aspirin: 417/3,705; control: 418/3,608; RR 0.96 (95% CI, 0.87-1.07)        |

RR = risk ratio.

**Table S4—[Section 4.0.1, 4.0.5] Prospective Studies of the Effect of Maternal Antithrombotic Therapy on Breast-fed Infants (Methodologic Quality)**

| Reference                                | Intervention                                                                                | Study Design                   | Randomization<br>Concealed | Blinding                                                                                       | Lost to Follow-up | Analysis | Comments                                                                          |
|------------------------------------------|---------------------------------------------------------------------------------------------|--------------------------------|----------------------------|------------------------------------------------------------------------------------------------|-------------------|----------|-----------------------------------------------------------------------------------|
| Orme et al <sup>6</sup> /1977            | Warfarin exposure during breast-feeding                                                     | Case series                    | NA                         | Patients: CN<br>Caregivers: CN<br>Data collectors: CN<br>Adjudicators: CN<br>Data analysts: CN | 0/7               | ITT      | Limited by small sample size                                                      |
| McKenna et al <sup>7</sup> /1983         | Warfarin exposure during breast-feeding                                                     | Case series                    | NA                         | Patients: CN<br>Caregivers: CN<br>Data collectors: CN<br>Adjudicators: CN<br>Data analysts: CN | 0/2               | ITT      | Limited by small sample size                                                      |
| Houwert-de Jong et al <sup>8</sup> /1981 | Acenocoumarol exposure during breast-feeding                                                | Case series                    | NA                         | Patients: CN<br>Caregivers: CN<br>Data collectors: CN<br>Adjudicators: CN<br>Data analysts: CN | 0/20              | ITT      | Limited by small sample size                                                      |
| Fondevila et al <sup>9</sup> /1989       | Acenocoumarol exposure during breast-feeding                                                | Case series                    | NA                         | Patients: CN<br>Caregivers: CN<br>Data collectors: CN<br>Adjudicators: CN<br>Data analysts: CN | 0/7               | ITT      | Limited by small sample size; two mothers had two infants included                |
| Richter et al <sup>10</sup> /2001        | LMWH exposure during breast-feeding (maternal-dose dalteparin 2,500 International Units SC) | Case series                    | NA                         | Patients: CN<br>Caregivers: CN<br>Data collectors: CN<br>Adjudicators: CN<br>Data analysts: CN | 0/15              | ITT      | Limited by small sample size                                                      |
| Ito et al <sup>11</sup> /1993            | Low-dose aspirin exposure during breast-feeding                                             | Subgroup of prospective cohort | NA                         | Patients: CN<br>Caregivers: CN<br>Data collectors: CN<br>Adjudicators: CN<br>Data analysts: CN | 0/15              | ITT      | Limited by small sample size; effect of aspirin on platelet function not assessed |

CN = certain no; ITT = intention to treat; LMWH = low-molecular-weight heparin; NA = not applicable; SC = subcutaneous.

**Table S5—[Section 4.0.1, 4.0.5] Prospective Studies of the Effect of Maternal Antithrombotic Therapy on Breast-fed Infants (Clinical Description and Results)**

| Reference                                | Interventions                                                                               | Number Patients Analyzed                | Length of Follow-up Postdelivery | Infant Hemorrhage                                         | Presence in Breast Milk (%)                                                       | Effect in Infant Blood                                                         | Comments                                                                                                        |
|------------------------------------------|---------------------------------------------------------------------------------------------|-----------------------------------------|----------------------------------|-----------------------------------------------------------|-----------------------------------------------------------------------------------|--------------------------------------------------------------------------------|-----------------------------------------------------------------------------------------------------------------|
| Orme et al <sup>1</sup> /1977            | Warfarin exposure during breast-feeding                                                     | Breast-fed infants, 7/7                 | Up to 10 d                       | 0/7                                                       | Warfarin, 0/7                                                                     | Warfarin, 0/7                                                                  | Warfarin levels measured by chromatography (lower limit of detection, 0.08 μmol/L)                              |
| McKenna et al <sup>1</sup> /1983         | Warfarin exposure during breast-feeding                                                     | Breast-fed infants, 2/2                 | First: 56 d<br>Second: 130 d     | 0/2                                                       | Warfarin, 0/2                                                                     | Elevated PT, 0/2                                                               | Presence of warfarin in breast milk detected by spectrophotometry                                               |
| Houwert-de Jong et al <sup>1</sup> /1981 | Acenocoumarol exposure during breast-feeding                                                | Breast-fed infants, 7/7                 | Not stated                       | Not reported                                              | Acenocoumarol, 0/20                                                               | Elevated thrombotest compared with normal range for age, 0/20                  | Presence of acenocoumarol in breast milk detected by high-performance liquid chromatography (limit of 15 ng/mL) |
| Fondevila et al <sup>1</sup> /1989       | Acenocoumarol exposure during breast-feeding                                                | Breast-fed infants, 7/7 (n = 4 mothers) | Not stated                       | No predisposition to perinatal hemorrhaging complications | Not reported                                                                      | Mean INR, % PT, % factor II, % factor VII-X not different from control infants | NA                                                                                                              |
| Richter et al <sup>1</sup> /2001         | LMWH exposure during breast-feeding (maternal-dose dalteparin 2,500 International Units SC) | Breast-fed infants, 15/15               | Up to 8 d                        | Not reported                                              | Detectable anti-Xa LMWH levels, 11/15 (range, 0.006-0.037 International Units/mL) | Not reported                                                                   | Therapeutic anti-Xa LMWH level, 0.5-1.5 International Units/mL 4-6 h postinjection                              |
| Ito et al <sup>1</sup> /1993             | Low-dose aspirin exposure during breast-feeding                                             | Breast-fed infants, 15/15               | Not reported                     | Not reported                                              | Not reported                                                                      | Not reported                                                                   | 0/15 with diarrhea, drowsiness, or irritability                                                                 |

INR = international normalized ratio; PT = prothrombin time. See Table S4 legend for expansion of other abbreviations.

**Table S6—[Section 5.1.1, 5.1.2] Risk of Thromboembolism in Patients Undergoing Assisted Reproductive Technology**

| Study/Year                           | Type of Study                    | Participants/ Intervention                                 | Follow-up                                                               | Risk of Thromboembolism                                                                                                                               | Strengths/Limitations                                                                                                                                                                                                                        |
|--------------------------------------|----------------------------------|------------------------------------------------------------|-------------------------------------------------------------------------|-------------------------------------------------------------------------------------------------------------------------------------------------------|----------------------------------------------------------------------------------------------------------------------------------------------------------------------------------------------------------------------------------------------|
| Máira et al <sup>13</sup> /2004      | Retrospective cohort             | 2,748 IVF cycles                                           | IVF cycle and pregnancy                                                 | Overall: 3/2,748 (0.1%); 95% CI, 0%-0.3%); all internal jugular DVT<br>In women with severe ovarian hyperstimulation: 2/49 (4.1%; 95% CI, 1.1%-13.7%) | Strengths:<br>Precision<br>Directness<br>Weaknesses:<br>Single center                                                                                                                                                                        |
| Aurousseur et al <sup>13</sup> /1995 | Retrospective cohort             | 1,102 IVF procedures; no cases of ovarian hyperstimulation | Not stated                                                              | Overall: 3/1,102 (0.3%); 95% CI, 0.1%-0.8%); two arterial events and one PE                                                                           | Strengths:<br>Precision<br>Directness<br>Weaknesses:<br>Single center<br>Duration of follow-up, methods of investigation, diagnostic testing strategies not described                                                                        |
| Delvigne et al <sup>12</sup> /1993   | Multicenter retrospective cohort | 128 women with ovarian hyperstimulation (cases)            | Not stated                                                              | In women with ovarian hyperstimulation: 1/128 (0.8%; 95% CI, 0.1%-4.3%); cerebral thrombosis                                                          | Strengths:<br>Multicenter<br>Directness<br>Weaknesses:<br>Imprecision<br>Unclear whether cases were consecutive<br>Duration of follow-up, methods of investigation, diagnostic testing strategies not described<br>17 patients received LMWH |
| Morris et al <sup>14</sup> /1995     | Prospective cohort               | 13 women with severe ovarian hyperstimulation              | During hospitalization for treatment of severe ovarian hyperstimulation | In women with severe ovarian hyperstimulation: 0/13 (0%); 95% CI, 0%-22.8%)                                                                           | Strengths:<br>Directness<br>Weaknesses:<br>Imprecision<br>Short follow-up                                                                                                                                                                    |

(Continued)

**Table S6—Continued**

| Study/Year                              | Type of Study                                                                                                                 | Participants/ Intervention                                    | Follow-up                                   | Risk of Thromboembolism                                                                                                                                                                                       | Strengths/Limitations                                                                                                                                                        |
|-----------------------------------------|-------------------------------------------------------------------------------------------------------------------------------|---------------------------------------------------------------|---------------------------------------------|---------------------------------------------------------------------------------------------------------------------------------------------------------------------------------------------------------------|------------------------------------------------------------------------------------------------------------------------------------------------------------------------------|
| Bergh and Lundkvist <sup>15</sup> /1992 | Survey of 12 fertility clinics                                                                                                | 10,125 IVF cycles with 7,331 embryo transfers                 | Varied from clinic to clinic (range, 1-9 y) | Overall: 1/10,125 (0.01%; 95% CI, 0%-0.1%); foot thrombosis                                                                                                                                                   | Strengths:<br>Multicenter<br>Precision<br>Directness<br>Weaknesses:<br>Retrospective review<br>Diagnostic criteria and investigative protocols not specified                 |
| Jacobsen et al <sup>16</sup> /2008      | Case-control study with cases from Norwegian Patient Register and controls from women who gave birth at a university hospital | 268 cases diagnosed with VTE during pregnancy; 1,229 controls | Pregnancy and first 3 mo postpartum         | Antepartum: singleton (adjusted OR, 4.3; 95% CI, 2.0-9.4); twins (adjusted OR, 6.6; 95% CI, 2.1-21.0)<br>Postpartum: singleton (adjusted OR, 2.6; 95% CI, 0.8-8.5); twins (adjusted OR, 0.6; 95% CI, 0.1-7.6) | Strengths:<br>Validated case diagnosis and comorbidities<br>Collected data on potential confounders and potential risk factors<br>Weaknesses:<br>Controls from single center |

IVF = in vitro fertilization; PE = pulmonary embolism. See Table S4 for expansion of other abbreviation.



**Table S7—[Section 5.1.1, 5.1.2] Risk of Bleeding in Patients Undergoing Transvaginal Oocyte Retrieval**

| Study/Year                              | Type of Study                  | Participants/Intervention    | Follow-up                            | Risk of Bleeding                                                                                                                                                                                                                                                                                                                                                                                                                                                            | Strengths/Limitations and Comments                                                                                                                |
|-----------------------------------------|--------------------------------|------------------------------|--------------------------------------|-----------------------------------------------------------------------------------------------------------------------------------------------------------------------------------------------------------------------------------------------------------------------------------------------------------------------------------------------------------------------------------------------------------------------------------------------------------------------------|---------------------------------------------------------------------------------------------------------------------------------------------------|
| Bergh and Lundkvist <sup>19</sup> /1992 | Survey of 12 fertility centers | 10,125 retrievals            | Varied from clinic to clinic (1-9 y) | Major bleeding: 2/10,125 (0.02%; 95% CI, 0%-0.1%); intraabdominal bleeding requiring laparotomy<br>Vaginal bleeding: 33/10,125 (0.3%; 95% CI, 0.2%-0.5%)                                                                                                                                                                                                                                                                                                                    | Strengths:<br>Multicenter<br>Precision<br>Directness<br>Weaknesses:<br>Retrospective definitions and methods of evaluating outcomes not specified |
| Ragni et al <sup>17</sup> /2009         | Prospective cohort             | 150 consecutive retrievals   | 72 h                                 | Major bleeding: 0/150 (0%; 95% CI, 0%-2.4%)<br>Median blood loss (interquartile range): 72 (-8 to 162 mL)                                                                                                                                                                                                                                                                                                                                                                   | Strengths:<br>Precision<br>Directness<br>Methods for detecting blood loss clearly described                                                       |
| Bennett et al <sup>18</sup> /1993       | Prospective cohort             | 2,670 consecutive retrievals | Not stated                           | Major bleeding: 1/2,670 (0.04%; 95% CI, 0%-0.2%); intraabdominal bleeding with hypovolemic shock necessitating emergency laparotomy (1 L hemoperitoneum)<br>Abdominal bleeding (nonmajor): 1/2,670 (0.04%; 95% CI, 0%-0.2%); trivial bleeding with 70 mL blood aspirated from the abdominal cavity<br>Vaginal bleeding: 229/2,670 (8.6%; 95% CI, 7.6%-9.7%) > 100 mL, 22/2,670 (0.8%; 95% CI, 0.5%-1.2%)<br>Requiring local compression, 28/2,670 (1.0%; 95% CI, 0.7%-1.5%) | Strengths:<br>Precision<br>Directness<br>Prospective<br>Weaknesses:<br>Follow-up not described<br>Methods for assessment of blood loss unclear    |
| Dicker et al <sup>19</sup> /1993        | Retrospective                  | 3,656 retrievals             | Not stated                           | Major bleeding: 3/3,656 (0.08%; 95% CI, 0%-0.2%); all intraabdominal; laparotomy and 4 units of blood required in one patient; drainage and hemostasis achieved laparoscopically in the other two patients.                                                                                                                                                                                                                                                                 | Strengths:<br>Precision<br>Directness<br>Weaknesses:<br>Retrospective<br>Follow-up not described                                                  |
| Tureck et al <sup>20</sup> /1993        | Retrospective                  | 674 retrievals               | Not stated                           | Vaginal bleeding: 2/674 (0.3%; 95% CI, 0.1%-1.1%) > 100 mL, one patient required sutures<br>Intraabdominal bleeding: 1/674 (0.1%; 95% CI, 0%-0.8%); expanding broad ligament bleed treated with diagnostic laparotomy and observation                                                                                                                                                                                                                                       | Strengths:<br>Precision<br>Directness<br>Weaknesses:<br>Retrospective<br>Follow-up not described                                                  |

(Continued)

**Table S7—Continued**

| Study/Year                         | Type of Study      | Participants/ Intervention | Follow-up                     | Risk of Bleeding                                                                                                                                                                                                                                                                                                                             | Strengths/Limitations and Comments                                    |
|------------------------------------|--------------------|----------------------------|-------------------------------|----------------------------------------------------------------------------------------------------------------------------------------------------------------------------------------------------------------------------------------------------------------------------------------------------------------------------------------------|-----------------------------------------------------------------------|
| Covaerts et al <sup>21</sup> /1998 | Retrospective      | 1,500 retrievals           | At least to completion of IVF | Intraabdominal bleeding: 3/1,500 (0.2%; 95% CI, 0.1%-0.6%); all three required laparoscopy                                                                                                                                                                                                                                                   | Strengths:<br>Precision<br>Directness<br>Weaknesses:<br>Retrospective |
| Ludwig et al <sup>22</sup> /2006   | Prospective cohort | 1,058 retrievals           | 2 mo postretrieval            | Vaginal bleeding: 28/1,049 (2.8%; 95% CI, 1.9%-3.9%)<br>Requiring compression, 28/1,049 (2.7%; 95% CI, 1.9%-3.9%)<br>Requiring tamponade for > 2 h, 1/1,049 (0.1%; 95% CI, 0%-0.5%)<br>Intraabdominal bleeding: 0/1,049 (0%; 95% CI, 0%-0.4%)                                                                                                | Strengths:<br>Precision<br>Directness<br>Prospective                  |
| Bodri et al <sup>23</sup> /2008    | Retrospective      | 4,052 retrievals           | 2 wk                          | Major bleeding: 1/4,052 (0.02%; 95% CI, 0%-0.5%) intraabdominal bleeding requiring laparotomy and transfusion<br>Other nonmajor bleeding: 13/4,052 (0.3%; 95% CI, 0.2%-0.5%); four patients had abdominal bleeding requiring laparoscopy; in the remaining nine patients, bleeding resolved spontaneously, although six were hospitalized    | Strengths:<br>Precision<br>Directness<br>Weaknesses:<br>Retrospective |
| Baber et al <sup>24</sup> /1988    | Retrospective      | 600 retrievals             | Not stated                    | Vaginal bleeding: 5/600 (0.8%; 95% CI, 0.4%-1.9%); requiring insertion of vaginal pack (none had significant fall in hemoglobin level)<br>Pelvic hematoma: 3/600 (0.5%; 95% CI, 0.2%-1.5%); all managed conservatively with no drop in hemoglobin level<br>Overt bleeding: 1/600 (0.2%; 95% CI, 0%-0.9%); 200-mL blood loss requiring suture | Strengths:<br>Precision<br>Directness<br>Weaknesses:<br>Retrospective |

**Table S8—[Section 5.1.1, 5.1.2] Risk of Thrombosis and Bleeding in Patients Receiving Prophylactic Anticoagulation Around the Time of Transvaginal Oocyte Retrieval**

| Study/Year                       | Type of Study    | Participants/Intervention                                                                                                                                                                                                                                                                                                                                                                                                                                                                                                                                                                                                                                                                                                                                                               | Follow-up                                                                                                                                      | Outcomes                                         | Results                                                                                                                                                                                   | Strengths/Limitations and Comments                                                                                                                                                                                                                                                                                                                                                                                                    |
|----------------------------------|------------------|-----------------------------------------------------------------------------------------------------------------------------------------------------------------------------------------------------------------------------------------------------------------------------------------------------------------------------------------------------------------------------------------------------------------------------------------------------------------------------------------------------------------------------------------------------------------------------------------------------------------------------------------------------------------------------------------------------------------------------------------------------------------------------------------|------------------------------------------------------------------------------------------------------------------------------------------------|--------------------------------------------------|-------------------------------------------------------------------------------------------------------------------------------------------------------------------------------------------|---------------------------------------------------------------------------------------------------------------------------------------------------------------------------------------------------------------------------------------------------------------------------------------------------------------------------------------------------------------------------------------------------------------------------------------|
| Yinon et al <sup>25</sup> /2006  | Retrospective    | <p>Twenty-four women considered high risk for thrombosis undergoing 73 IVF cycles and 68 oocyte retrieval procedures (five very high risk used a controlled spontaneous cycle and surrogacy). Patients received LMWH (0.6-1 mg/kg per d) starting on the day of GnRH agonist administration (when GnRH agonist protocols were used) and on the first day of gonadotropin administration in the GnRH antagonist protocol. The last injection of LMWH was administered 14-15 h prior to oocyte retrieval and resumed 12 h postprocedure. Anticoagulation was continued in pregnancy and stopped after a negative pregnancy test. Very-high-risk patients received warfarin ± aspirin prior to oocyte retrieval before transitioning to LMWH postretrieval (unless planned surrogacy).</p> | Until delivery of embryo transfer if pregnancy not achieved.                                                                                   | Bleeding<br>Thromboembolism                      | Bleeding: 0/24<br>(0; 95% CI, 0%-13.8%)<br>Thromboembolism: 0/24 (0; 95% CI, 0%-13.8%)                                                                                                    | Strengths:<br>Directness<br>Weaknesses:<br>Imprecision<br>Retrospective                                                                                                                                                                                                                                                                                                                                                               |
| Qublan et al <sup>26</sup> /2008 | Randomized trial | <p>Eighty-three women with at least three failed assisted reproduction cycles and at least one thrombophilia. Patients were allocated to enoxaparin 40 mg/d (n = 42) or placebo (n = 41) starting on the day of embryo transfer and continued until completion of pregnancy.</p>                                                                                                                                                                                                                                                                                                                                                                                                                                                                                                        | Until delivery. Five women in each group were lost to follow-up in the LMWH group, and three were lost to follow-up in the no-treatment group. | Implantation success, live births, complications | Bleeding: enoxaparin, 3/42 (7.1%; 95% CI, 2.5%-19.0%)<br>Thrombocytopenia: enoxaparin, 2/42 (4.8%; 95% CI, 1.3%-15.8%)<br>Allergic reactions: enoxaparin, 1/42 (2.4%; 95% CI, 0.4%-12.3%) | Strengths:<br>Directness<br>Randomized trial<br>Weaknesses:<br>Imprecision<br>Only participants were blinded For 32% of participants, the qualifying thrombophilia was the <i>MTHFR</i> C677T mutation, which is not a risk factor for venous thrombosis<br>Criteria for bleeding and thrombocytopenia not specified<br>Bleeding not specifically reported for placebo group<br>Thrombosis not specifically reported for either group |

(Continued)

Table S8—Continued

| Study/Year                      | Type of Study                                                                        | Participants/Intervention                                                                                                                                                                                                                                                                                                                                                                            | Follow-up                          | Outcomes                                       | Results                                                                                                   | Strengths/Limitations and Comments                                                                                                                           |
|---------------------------------|--------------------------------------------------------------------------------------|------------------------------------------------------------------------------------------------------------------------------------------------------------------------------------------------------------------------------------------------------------------------------------------------------------------------------------------------------------------------------------------------------|------------------------------------|------------------------------------------------|-----------------------------------------------------------------------------------------------------------|--------------------------------------------------------------------------------------------------------------------------------------------------------------|
| Stern et al <sup>27</sup> /2003 | Randomized, double-blind, placebo-controlled, crossover trial (transfer by transfer) | One hundred forty-three women with an autoantibody (either APLA, antinuclear, or anti- $\beta_2$ -glycoprotein I) and at least 10 prior unsuccessful embryo transfers. Patients were allocated to either UFH 5,000 units bid SC and aspirin (158 transfers of 296 embryos) or placebo (142 transfers of 259 embryos) starting the day of embryo transfer until 14 wk gestation or pregnancy failure. | Until delivery or end of pregnancy | Successful implantation, live births, bleeding | Significant bleeding; heparin and aspirin, 0/158 (0; 95% CI, 0%-2.4%) Placebo, 0/142 (0; 95% CI, 0%-2.6%) | Strengths: Directness Randomized trial Double blinding<br>Weaknesses: Criteria for significant bleeding not reported<br>Thrombosis not specifically reported |

APLA = antiphospholipid antibody; GHRH = growth-hormone-releasing hormone; GnRH = gonadotropin-releasing hormone; MTHFR = methylene tetrahydrofolate reductase variant. See Table S1 and S4 legends for expansion of other abbreviations.

**Table S9—[Section 5.1.1, 5.1.2] Evidence Profile: Prophylactic-Dose LMWH vs No Thromboprophylaxis for Women Who Undergo Assisted Reproductive Therapy**

| Participants (Studies), Follow-up     | Quality Assessment      |                          |                                                      |                                                                           | Summary of Findings |                                         |                                                                        |                          |                                                                                                                                      |
|---------------------------------------|-------------------------|--------------------------|------------------------------------------------------|---------------------------------------------------------------------------|---------------------|-----------------------------------------|------------------------------------------------------------------------|--------------------------|--------------------------------------------------------------------------------------------------------------------------------------|
|                                       | Risk of Bias            | Inconsistency            | Indirectness                                         | Imprecision                                                               | Publication Bias    | Overall Quality of Evidence             | Study Event Rates (%)                                                  | Relative Effect (95% CI) | Anticipated Absolute Effects <sup>b</sup>                                                                                            |
| 1,953 (6 RCTs), 27-35 d postoperative | No serious risk of bias | No serious inconsistency | Serious indirectness <sup>a</sup> orthopedic surgery | Serious imprecision <sup>a</sup> wide CI for control group risk estimates | Undetected          | Low due to indirectness and imprecision | 36/862 (4.2) Without Prophylaxis <sup>c</sup> 15/1,091 (1.4) With LMWH | RR 0.36 (0.20-0.67)      | Without severe ovarian hyperstimulation syndrome<br>2 VTE per 1,000 <sup>d</sup><br>1 fewer VTE per 1,000 (from 2 fewer to 0 fewer)  |
| 5,456 (7 RCTs), 3 wk-9 mo             | No serious risk of bias | No serious inconsistency | Serious indirectness <sup>a</sup> orthopedic surgery | Serious imprecision <sup>a</sup> wide CI for control group risk estimates | Undetected          | Major bleed (critical outcome) Low      | 2/1,480 (0.14) 6/1,245 (0.48)                                          | RR 0.43 (0.11-1.65)      | With severe ovarian hyperstimulation syndrome<br>40 VTE per 1,000 <sup>d</sup><br>26 fewer VTE per 1,000 (from 32 fewer to 13 fewer) |

Bibliography: Hull RD, et al. Extended out of hospital low molecular weight heparin prophylaxis against deep vein thrombosis in patients after elective hip arthroplasty: a systematic review. *Ann Intern Med.* 2001;135:858-869. RCT = randomized controlled trial. See Table S4 and S6 legends for expansion of other abbreviations.

<sup>a</sup>The population did not include pregnant women. Different doses of LMWH were used, treatment was initiated variably before or after surgery with a duration of ~7 days (in hospital). Outcomes were variably reported, meta-analysis also provides other outcomes such as mortality, asymptomatic DVT, and specific bleed outcomes (wound hematoma, transfusion). Follow-up varied between trials from 3 wk to 9 mo.

<sup>b</sup>Time frame is 9 mo for all outcomes.

<sup>c</sup>Imprecise control group risk estimates for bleeding events and for VTE in the subset of women with ovarian hyperstimulation (Tables S6-S8).

<sup>d</sup>Control group risk for VTE and major bleed come from observational studies of women undergoing assisted reproductive technology (Tables S6-S8).

**Table S10—[Section 6.2.1-6.2.4] Risk Factors for Pregnancy-Associated VTE**

| Risk Factor                                                                                                                  | Adjusted OR | 95% CI     |
|------------------------------------------------------------------------------------------------------------------------------|-------------|------------|
| Immobility (strict bed rest for $\geq 1$ wk in the antepartum period) with BMI $\geq 25$ kg/m <sup>2</sup> (antenatal risk)  | 62.3        | 11.5-337.0 |
| Immobility (strict bed rest for $\geq 1$ wk in the antepartum period) with BMI $\geq 25$ kg/m <sup>2</sup> (postpartum risk) | 40.1        | 8.0-201.5  |
| Factor V Leiden homozygosity                                                                                                 | 34.4        | 9.9-120.1  |
| Prothrombin G20210A homozygosity                                                                                             | 26.4        | 1.2-559.3  |
| Previous VTE                                                                                                                 | 24.8        | 17.1-36    |
| Postpartum infection (clinical signs/symptoms + fever + elevated WBC) following vaginal delivery                             | 20.2        | 6.4-63.5   |
| Postpartum hemorrhage $\geq 1,000$ mL with surgery                                                                           | 12.0        | 3.9-36.9   |
| Immobility (strict bed rest for $\geq 1$ wk in the antepartum period) with BMI $< 25$ kg/m <sup>2</sup> (postpartum risk)    | 10.8        | 4.0-28.8   |
| Systemic lupus erythematosus                                                                                                 | 8.7         | 5.8-13.0   |
| Factor V Leiden heterozygosity                                                                                               | 8.3         | 5.4-12.7   |
| Immobility (strict bed rest for $\geq 1$ wk in the antepartum period) with BMI $< 25$ kg/m <sup>2</sup> (antepartum risk)    | 7.7         | 3.2-19.0   |
| Blood transfusion                                                                                                            | 7.6         | 6.2-9.4    |
| Heart disease                                                                                                                | 7.1         | 6.2-8.3    |
| Prothrombin G20210A heterozygosity                                                                                           | 6.8         | 2.5-18.8   |
| Sickle cell disease                                                                                                          | 6.7         | 4.4-10.1   |
| Postpartum infection (clinical signs/symptoms + fever + elevated WBC) following cesarean section                             | 6.2         | 2.4-16.2   |
| Preeclampsia with fetal growth restriction                                                                                   | 5.8         | 2.1-16     |
| Multiple pregnancy                                                                                                           | 4.2         | 1.8-9.7    |
| BMI $> 30$ kg/m <sup>2</sup>                                                                                                 | 5.3         | 2.1-13.5   |
| Protein C deficiency                                                                                                         | 4.8         | 2.2-10.6   |
| Antithrombin deficiency                                                                                                      | 4.7         | 1.3-17.0   |
| Assisted reproductive techniques                                                                                             | 4.3         | 2.0-9.4    |
| Postpartum hemorrhage $> 1$ L                                                                                                | 4.1         | 2.3-7.3    |
| Fetal growth restriction (gestational age + sex-adjusted birth weight $< 2.5$ th percentile)                                 | 3.8         | 1.4-10.2   |
| Smoking (10-30 cigarettes/d prior to or during pregnancy) (postpartum risk)                                                  | 3.4         | 2.0-5.5    |
| Protein S deficiency                                                                                                         | 3.2         | 1.5-6.9    |
| Preeclampsia                                                                                                                 | 3.1         | 1.8-5.3    |
| Emergency cesarean section                                                                                                   | 2.7         | 1.8-4.1    |
| Anemia                                                                                                                       | 2.6         | 2.2-2.9    |
| Smoking (10-30 cigarettes/d prior to or during pregnancy) (antepartum risk)                                                  | 2.1         | 1.3-3.4    |
| Smoking (5-9 cigarettes/d prior to or during pregnancy) (postpartum risk)                                                    | 2.0         | 1.1-3.7    |
| Weight gain $> 21$ kg (vs 7-21 kg)                                                                                           | 1.6         | 1.1-2.6    |
| Parity $> 1$                                                                                                                 | 1.5         | 1.1-1.9    |
| Age $> 35$ y                                                                                                                 | 1.3         | 1.0-1.7    |
| Cesarean section (nonemergent)                                                                                               | 1.3         | 0.7-2.2    |

Data are from Jacobsen et al,<sup>16</sup> Jacobsen et al,<sup>28</sup> Lindqvist et al,<sup>29</sup> Simpson et al,<sup>30</sup> Knight,<sup>31</sup> Roberston et al,<sup>32</sup> and James et al.<sup>33</sup>

**Table S11—[6.2.1-6.2.4] Risk Factors for Postpartum VTE**

| Risk Factor                                                                                                | Adjusted OR | 95% CIs   |
|------------------------------------------------------------------------------------------------------------|-------------|-----------|
| Immobility (strict bed rest for $\geq 1$ wk in the antepartum period) with BMI $\geq 25$ kg/m <sup>2</sup> | 40.1        | 8.0-201.5 |
| Postpartum infection (clinical signs/symptoms + fever + elevated WBC) following vaginal delivery           | 20.2        | 6.4-63.5  |
| Postpartum hemorrhage $\geq 1,000$ mL with surgery                                                         | 12.0        | 3.9-36.9  |
| Immobility (strict bed rest for $\geq 1$ wk in the antepartum period) with BMI $< 25$ kg/m <sup>2</sup>    | 10.8        | 4.0-28.8  |
| Postpartum infection (clinical signs/symptoms + fever + elevated WBC) following cesarean section           | 6.2         | 2.4-16.2  |
| Preeclampsia with fetal growth restriction                                                                 | 5.8         | 2.1-16    |
| Postpartum hemorrhage $> 1$ L                                                                              | 4.1         | 2.3-7.3   |
| Fetal growth restriction (gestational age + sex-adjusted birth weight $< 2.5$ th percentile)               | 3.8         | 1.4-10.2  |
| Smoking (10-30 cigarettes/d prior to or during pregnancy)                                                  | 3.4         | 2.0-5.5   |
| Preeclampsia                                                                                               | 3.1         | 1.8-5.3   |
| Emergency cesarean section                                                                                 | 2.7         | 1.8-4.1   |
| BMI prepregnancy $> 25$ kg/m <sup>2</sup>                                                                  | 2.4         | 1.7-3.3   |
| Smoking (5-9 cigarettes/d prior to or during pregnancy)                                                    | 2.0         | 1.1-3.7   |
| Cesarean section (nonemergent)                                                                             | 1.3         | 0.7-2.2   |

Data are from Jacobsen et al.<sup>16</sup>

**Table S12—[Section 6.2.1-6.2.4] Evidence Profile: LMWH vs No Thromboprophylaxis for Prevention of VTE in Women Undergoing Cesarean Section**

| Participants (Studies), Follow-up                                                                                                                             | Quality Assessment                                               |                          |                                                                                |                        | Summary of Findings |                             |                                                                |                          |                                                                                                         |
|---------------------------------------------------------------------------------------------------------------------------------------------------------------|------------------------------------------------------------------|--------------------------|--------------------------------------------------------------------------------|------------------------|---------------------|-----------------------------|----------------------------------------------------------------|--------------------------|---------------------------------------------------------------------------------------------------------|
|                                                                                                                                                               | Risk of Bias                                                     | Inconsistency            | Indirectness                                                                   | Imprecision            | Publication Bias    | Overall Quality of Evidence | Study Event Rates (%) <sup>a</sup>                             | Relative Effect (95% CI) | Anticipated Absolute Effects <sup>b</sup>                                                               |
| 4,890 (3 RCTs), 3 wk-9 mo                                                                                                                                     | No serious risk of bias <sup>c</sup> Selective outcome reporting | No serious inconsistency | Serious indirectness general surgery                                           | No serious imprecision | Undetected          | Moderate                    | 22/2,445 (0.9) Without Prophylaxis<br>5/2,445 (0.02) With LMWH | RR 0.29 (0.11-0.73)      | Risk Without Prophylaxis <sup>c</sup><br>Risk Difference With LMWH (95% CI)<br>Low risk                 |
| Symptomatic VTE (critical outcome), DVT, and PE (only symptomatic PE, not symptomatic DVT, reported separately in meta-analysis) measured at end of follow-up |                                                                  |                          |                                                                                |                        |                     |                             |                                                                |                          |                                                                                                         |
| 5,456 (7 RCTs), 3 wk-9 mo                                                                                                                                     | No serious risk of bias                                          | No serious inconsistency | Serious indirectness <sup>e</sup> Heterogeneous definitions of bleeding events | No serious imprecision | Undetected          | Moderate                    | 37/2,728 (0.14) 74/2,728 (0.48)                                | RR 2.03 (1.37-3.01)      | 20 bleeding events per 1,000 <sup>f</sup><br>20 more bleeding events per 1,000 (from 8 more to 40 more) |

**Bibliography:** Mismetti P, Laporte S, Darmon JY, Buchmüller A, Decousus H. Meta-analysis of low molecular weight heparin in the prevention of venous thromboembolism in general surgery. *Br J Surg.* 2001;88:913-930. Blondon M, Perrier A, Nendaz M, et al. Thromboprophylaxis with low-molecular-weight heparin after cesarean delivery. A decision analysis. *Thromb Haemost.* 2010;103:129-137. See Table S3, S4, S6, and S9 legends for expansion of abbreviations.

<sup>a</sup>The denominators for LMWH and controls were extracted by dividing total no of participants by two.

<sup>b</sup>Time frame is 9 mo for all outcomes.

<sup>c</sup>Only five of eight RCTs of LMWH vs placebo/no treatment reported mortality. We did not rate down for risk of bias.

<sup>d</sup>For source of control group risk estimates see text and Tables S10 and S11.

<sup>e</sup>Rated down for indirectness due to variable bleeding definitions in trials (bleeding leading to death, transfusion, reoperation, or discontinuation of therapy) measured at end of therapy.

<sup>f</sup>Control group risk estimate for major bleeding events comes from study by Blondon et al.



**Table S13—Decision and Cost-Effectiveness Analyses/Economic Analyses Study: Methodologic Key Information**

| Study/Year                            | Type of Analysis | Type of Model                 | All Relevant Strategies Considered?       | Perspect. of Analysis | Time Frame of Analysis | RCT from different patient population | Costs                                                      | QOL Measures                       | Benefits or Costs and Benefits Completely Specified? | Are Costs and Benefits Discounted? | Were Sensitivity Analyses Performed? | Comments                                                                             |
|---------------------------------------|------------------|-------------------------------|-------------------------------------------|-----------------------|------------------------|---------------------------------------|------------------------------------------------------------|------------------------------------|------------------------------------------------------|------------------------------------|--------------------------------------|--------------------------------------------------------------------------------------|
|                                       |                  |                               |                                           |                       |                        |                                       |                                                            |                                    |                                                      |                                    |                                      |                                                                                      |
| Casale and Grobman <sup>a</sup> /2006 | Cost-effective   | Markov transition state model | No, pharmacol. prophylaxis not considered | Health-care payer     | Life-time of cohort    |                                       | Published C/E analyses                                     | Published C/E or decision analysis | Yes                                                  | Yes, 3%                            | Deterministic Yes                    | Pharmacologic prophylaxis not included as a comparator                               |
|                                       |                  |                               |                                           |                       |                        |                                       | Costs included: Underlying disease treatment complications | QOL metrics: Not stated            |                                                      |                                    | Probabilistic No                     | Moderate uncertainty in baseline risk and effectiveness                              |
|                                       |                  |                               |                                           |                       |                        |                                       |                                                            |                                    |                                                      |                                    |                                      | Satisfactory quality but not definitive given data uncertainties as noted by authors |

QOL = quality of life. See Table S9 legend for expansion of other abbreviation.

<sup>a</sup>Definitions: very good, 90% to 100% of quality items present; good, 80% to 89% of quality items present; satisfactory, 60% to 79% of quality items present; unsatisfactory, < 60% of quality items present.

**Table S14—Decision and Cost-Effectiveness Analyses/Economic Analyses Study: Description of Study**

| Outcome Measures                       |                                         |                                                                                         |               |                                                                                                                   |          |                                                     |                                                                                                                                                                                                            |
|----------------------------------------|-----------------------------------------|-----------------------------------------------------------------------------------------|---------------|-------------------------------------------------------------------------------------------------------------------|----------|-----------------------------------------------------|------------------------------------------------------------------------------------------------------------------------------------------------------------------------------------------------------------|
| Study/Year                             | Strategies Analyzed                     | Target Populations <sup>a</sup>                                                         | Effectiveness | Cost <sup>b</sup>                                                                                                 |          | Funding Sources and Potential Conflicts of Interest | Study Conclusions, Assessment of Continued Relevance, Additional Comments <sup>c</sup>                                                                                                                     |
| Casele and Grobman <sup>34</sup> /2006 | Pneumatic compression vs no prophylaxis | Pregnant women undergoing cesarean section who were not anticoagulated during pregnancy |               | QALYs                                                                                                             | USD 2004 | Funding source (if any) not stated                  | Pharmacologic prophylaxis not included as a comparator<br>Moderate uncertainty in baseline risk and effectiveness<br>Satisfactory quality, but not definitive given data uncertainties as noted by authors |
|                                        |                                         |                                                                                         |               | Results (expected utilities, ICERs, etc)                                                                          |          |                                                     |                                                                                                                                                                                                            |
|                                        |                                         |                                                                                         |               | Delta costs: + \$ 104<br>Delta QALYs: + 0.00263<br>ICER: 39,545 (range up to 200,000 +, depending on assumptions) |          |                                                     |                                                                                                                                                                                                            |

ICER = incremental cost-effectiveness ratio; QALY = quality adjusted life year; USD = US dollar.

<sup>a</sup>Types of patients/multiple subgroups.

<sup>b</sup>Average wholesale price (eg, Redbook, Bluebook) or average sales price based estimate.

<sup>c</sup>Quality category definitions: very good, 90% to 100% of quality items present; good, 80% to 89% of quality items present; satisfactory, 60% to 79% of quality items present; unsatisfactory, < 60% of quality items present.

**Table S15—[Section 7.1.2] Evidence Profile: Should LMWH Rather Than VKAs Be Used for Long-term Treatment of VTE in Pregnant Women?**

| Participants (Studies), Follow-up | Quality Assessment                                                   |                          |                                                                           |                                                               | Summary of Findings |                                          |                                      |                                                                                                                               |
|-----------------------------------|----------------------------------------------------------------------|--------------------------|---------------------------------------------------------------------------|---------------------------------------------------------------|---------------------|------------------------------------------|--------------------------------------|-------------------------------------------------------------------------------------------------------------------------------|
|                                   | Risk of Bias                                                         | Inconsistency            | Indirectness                                                              | Imprecision                                                   | Publication Bias    | Overall Quality of Evidence              | Study Event Rates (%)                | Anticipated Absolute Effects During Pregnancy                                                                                 |
| 2,496 (7 RCTs), 6 mo              | Serious risk of bias<br>No studies were blinded                      | No serious inconsistency | No serious indirectness                                                   | No serious imprecision                                        | Undetected          | Moderate due to risk of bias             | 202/1,231 (16.4)<br>204/1,265 (16.1) | RR 0.62 (0.46-0.84)<br>30 VTE per 1,000 <sup>a</sup><br>11 fewer VTE (from 5 fewer to 16 fewer)                               |
| 2,727 (8 RCTs), 6 mo              | No serious risk of bias<br>Lack of blinding not serious <sup>b</sup> | No serious inconsistency | No serious indirectness                                                   | Serious imprecision<br>CI includes important benefit and harm | Undetected          | Moderate due to imprecision              | 105/1,349 (7.8)<br>67/1,378 (4.9)    | RR 0.81 (0.55-1.2)<br>20 bleeding events per 1,000 <sup>c</sup><br>4 fewer bleeding events per 1,000 (from 9 fewer to 4 more) |
| 100 (1 RCT), not reported         | Serious risk of bias<br>Patients and investigators not blinded       | No serious inconsistency | Serious indirectness<br>Predictive value from 3 mo to long term uncertain | No serious imprecision                                        | Undetected          | Low due to risk of bias and indirectness | 31/44 (70.5)<br>34/56 (60.7)         | RR 0.85 (0.77-0.94)<br>480 PTS per 1,000 <sup>d</sup><br>72 fewer PTS per 1,000 (from 110 fewer to 29 fewer)                  |

**Bibliography:** Kearon C, Akl EA, Comerato AJ, et al. Antithrombotic therapy for VTE disease: antithrombotic therapy and prevention of thrombosis, 9th ed: American College of Chest Physicians evidence-based clinical practice guidelines. *Chest*. 2012;141(2)(suppl 1):e418S-e494S. Prandoni P, Lensing AW, Piccoli A, et al. Recurrent venous thromboembolism and bleeding complications during anticoagulant treatment in patients with cancer and venous thrombosis. *Blood*. 2002;100:3484-3489. Beyth RJ, Quinn LM, Landefeld CS. Prospective evaluation of an index for predicting the risk of major bleeding in outpatients treated with warfarin. *Am J Med*. 1998;105:91-99.

Meta-analysis is based on RCTs as referenced in the text of Kearon et al<sup>175</sup> in this guideline. Limited to LMWH regimens that used  $\geq 50\%$  of the acute treatment dose during the extended phase of treatment. PTS = postthrombotic syndrome. See Table S1, S3, S4, S6, and S9 legends for expansion of other abbreviations.

<sup>a</sup>Control group risk estimate for VTE with VKAs comes from cohort study by Prandoni et al, adjusted to 6-mo time frame.

<sup>b</sup>Outcome less subjective: Borderline decision.

<sup>c</sup>Control group risk estimate for major bleeding events comes from cohort studies by Prandoni et al and Beyth et al, adjusted to 6-mo time frame.

<sup>d</sup>Control group risk estimate for PTS comes from observational study of pregnant women (most mild).<sup>171</sup>

**Table S16—[Section 8.2.2, 8.2.3] Risk of Recurrent VTE in Pregnant Women Without Antepartum Thrombosis Prophylaxis**

| Study/Year                                                                                                               | Type of Study            | Participants                                                                                               | Intervention                                                                                                                                                                    | Outcomes                                                | Follow-up       | Results                                               | Strengths                                     | Limitations                                                                                                                                                                                                                                              |
|--------------------------------------------------------------------------------------------------------------------------|--------------------------|------------------------------------------------------------------------------------------------------------|---------------------------------------------------------------------------------------------------------------------------------------------------------------------------------|---------------------------------------------------------|-----------------|-------------------------------------------------------|-----------------------------------------------|----------------------------------------------------------------------------------------------------------------------------------------------------------------------------------------------------------------------------------------------------------|
|                                                                                                                          |                          | Prospective studies                                                                                        |                                                                                                                                                                                 |                                                         |                 |                                                       |                                               |                                                                                                                                                                                                                                                          |
| Howell et al <sup>35/1983</sup>                                                                                          | RCT                      | N = 40; n = 20 in control arm                                                                              | No antepartum prophylaxis; postpartum UFH 8,000 bid                                                                                                                             | Bleeding<br>Osteopenia<br>Recurrent VTE                 | 6 wk postpartum | Antepartum: 1 (5%; 95% CI, 0.1%-25%)<br>Postpartum: 0 | RCT, concealment of allocation adequate       | Primary outcome was side effects (osteopenia, antenatal bleeding) rather than VTE, no ITT analysis, mean gestational age at entry 14 wk (range, 8-37 wk), no objective diagnosis of first VTE, no description of diagnostic techniques for recurrent DVT |
| Lao et al <sup>36/1985</sup> and de Swiet et al <sup>37/1987</sup> (latter report provides additional data to the first) | Prospective cohort study | N = 59; 25% women had single previous VTE related to pregnancy; 39% had single previous VTE during OCP use | No antepartum prophylaxis (two protocol violations in which patients received antepartum anticoagulants)<br>Dextran during delivery and heparin or warfarin for 6 wk postpartum | Recurrent VTE                                           | 6 wk postpartum | Antepartum: 0<br>Postpartum: 0                        |                                               |                                                                                                                                                                                                                                                          |
| Brill-Edwards et al <sup>38/2000</sup>                                                                                   | Prospective cohort       | N = 125 women with one objectively diagnosed previous VTE                                                  | No antepartum prophylaxis; postpartum prophylaxis with warfarin                                                                                                                 | Recurrent VTE<br>antepartum<br>Recurrent VTE postpartum | 3 mo postpartum | Antepartum: 3/125; 2.4% (95% CI, 0.2%-6.9%)           | Prospective, single episode of prior VTE only | Inclusion at median gestational age of 15 wk, exclusion of women with known thrombophilia                                                                                                                                                                |

(Continued)

**Table S16—Continued**

| Study/Year                          | Type of Study              | Participants                                                                                   | Intervention                                                                                                                           | Outcomes                                                                 | Follow-up                         | Results                                                                                                                                                                                                                                                                          | Strengths | Limitations                                                                                                                                                                                                                                                                                                    |
|-------------------------------------|----------------------------|------------------------------------------------------------------------------------------------|----------------------------------------------------------------------------------------------------------------------------------------|--------------------------------------------------------------------------|-----------------------------------|----------------------------------------------------------------------------------------------------------------------------------------------------------------------------------------------------------------------------------------------------------------------------------|-----------|----------------------------------------------------------------------------------------------------------------------------------------------------------------------------------------------------------------------------------------------------------------------------------------------------------------|
|                                     |                            |                                                                                                |                                                                                                                                        |                                                                          |                                   | No recurrences in women with no thrombophilia and a provoked first VTE (0/44, 0%; 95% CI, 0%-8.0%); of women with an idiopathic first VTE or abnormal thrombophilia testing, 3/51 (5.9%; 95% CI, 1.2%-16.2%) developed recurrence<br>Postpartum: 3/122 (2.5%; 95% CI, 0.5%-7.0%) |           |                                                                                                                                                                                                                                                                                                                |
| Retrospective studies               |                            |                                                                                                |                                                                                                                                        |                                                                          |                                   |                                                                                                                                                                                                                                                                                  |           |                                                                                                                                                                                                                                                                                                                |
| Badaracco et al <sup>39</sup> /1974 | Retrospective cohort study | N = 30 women with previous VTE                                                                 | Not stated                                                                                                                             | Recurrent VTE during pregnancy or postpartum period                      | Not stated                        | Total: 6/15 (40%; 95% CI, 16.3%-67.7%); distribution between antepartum and postpartum not provided                                                                                                                                                                              |           | Retrospective, included women with more than one previous VTE, questionnaire data, no objective diagnosis                                                                                                                                                                                                      |
| Tengborn et al <sup>40</sup> /1989  | Retrospective cohort study | N = 72 women with previous VTE (87 pregnancies; 67 pregnancies without antepartum prophylaxis) | No antepartum prophylaxis<br>Postpartum: no prophylaxis (n = 30)<br>Various anticoagulant regimens, including UFH and dextran (n = 57) | Recurrent VTE; superficial thrombophlebitis (not included in this table) | Until postpartum; time not stated | Antepartum: 5/67 (7.5%; 95% CI, 2%-14%)<br>Postpartum: 2/30 (6.7%; 95% CI, 0%-21%)<br>All recurrences in women with previous VTE elicited by pregnancy or OCP use                                                                                                                |           | Retrospective, questionnaire data, no objective diagnosis, women with multiple previous episodes of VTE included, some women with hereditary thrombophilia (anticoagulant inhibitor deficiencies n = 3; defective fibrinolysis n = 18), wide range of postpartum regimens, potential confounding by indication |

(Continued)

**Table S16—Continued**

| Study/Year                         | Type of Study              | Participants                                                                                                                                        | Intervention                                                                                                     | Outcomes                                                                     | Follow-up       | Results                                                                                                                                                                                                                                                                                                                                                                                                                                                        | Strengths                                                                                   | Limitations                                                                                                                           |
|------------------------------------|----------------------------|-----------------------------------------------------------------------------------------------------------------------------------------------------|------------------------------------------------------------------------------------------------------------------|------------------------------------------------------------------------------|-----------------|----------------------------------------------------------------------------------------------------------------------------------------------------------------------------------------------------------------------------------------------------------------------------------------------------------------------------------------------------------------------------------------------------------------------------------------------------------------|---------------------------------------------------------------------------------------------|---------------------------------------------------------------------------------------------------------------------------------------|
| Pabinger et al <sup>11</sup> /2005 | Retrospective cohort study | N = 109 women with previous VTE (197 pregnancies; 284 postpartum periods, including after terminations, miscarriages, stillbirths, and live births) | No antepartum prophylaxis; inconsistent use of postpartum prophylaxis, mainly low-dose LMWH (details not stated) | Cumulative incidence of recurrent VTE antepartum<br>Recurrent VTE postpartum | 6 wk postpartum | Antepartum: 8/197 (cumulative incidence, 6.2%; 95% CI, 1.6%-10.6%)<br>No predictive value of thrombophilia or whether first episode was idiopathic<br>Recurrence risk in subgroup of women with first VTE associated with OCP use 10% vs 2.7% if first VTE not associated with OCP use (ns)<br>Postpartum: overall, 15/284 (5.3%; 95% CI, 3.0%-8.6%); without prophylaxis, 10/187 (5.4%; 95% CI, 2.6%-9.6%); with prophylaxis, 5/97 (5.2%; 95% CI, 1.7%-11.6%) | Assessed risk for full period of pregnancy (ie, including early terminations, miscarriages) | Retrospective, included women with more than one previous VTE, not all VTE objectively diagnosed, potential confounding by indication |

(Continued)

**Table S16—Continued**

| Study/Year                           | Type of Study              | Participants                                     | Intervention                                                              | Outcomes                                                                     | Follow-up                                               | Results                                                                                                        | Strengths                                                                                                                                                                                                                                                                                                                                            | Limitations                                                                                                             |
|--------------------------------------|----------------------------|--------------------------------------------------|---------------------------------------------------------------------------|------------------------------------------------------------------------------|---------------------------------------------------------|----------------------------------------------------------------------------------------------------------------|------------------------------------------------------------------------------------------------------------------------------------------------------------------------------------------------------------------------------------------------------------------------------------------------------------------------------------------------------|-------------------------------------------------------------------------------------------------------------------------|
| De Stefano et al <sup>12</sup> /2006 | Retrospective cohort study | N = 88 women with previous VTE (155 pregnancies) | No antepartum prophylaxis; 120 pregnancies without postpartum prophylaxis | Cumulative incidence of recurrent VTE antepartum<br>Recurrent VTE postpartum | 6 wk postpartum if delivery after 16 wk gestational age | Antepartum: 9/155 (5.8%; 95% CI, 3.0%-10.6%)<br>Subgroup of women with and without thrombophilia: 7.9% vs 4.2% | Subgroup of women with first VTE hormonally provoked (ie, related to pregnancy or OCP use), 9.5% vs unprovoked, 4.2%, vs transient nonhormonal risk factor, 0%<br>Postpartum: 8.3% (95% CI, 4.5%-14.6%)<br>First pregnancy-related VTE, 15.5% vs first event-related to OCP use, 0%, vs unprovoked, 3.1%, vs transient nonhormonal risk factor, 7.1% | Retrospective, included women with previous VTE, not all VTE objectively diagnosed, potential confounding by indication |

ns = not significant; OCP = oral contraception. See Table S1, S4, and S9 for expansion of other abbreviations.

**Table S17—[Section 8.2.2, 8.2.3] Risk of Symptomatic Recurrent VTE and Bleeding in Pregnant Women Receiving Antepartum Thrombosis Prophylaxis: RCTs**

| Study/Year                        | Type of Study | Participants                      | Intervention                                                                                                                                | Control                                                     | Outcomes                                                        | Follow-up       | Results                                                                                                                                                                                                                                                                                                                                                                                          | Strengths                                                                          | Limitations                                                                                                                                                                                                                                         |
|-----------------------------------|---------------|-----------------------------------|---------------------------------------------------------------------------------------------------------------------------------------------|-------------------------------------------------------------|-----------------------------------------------------------------|-----------------|--------------------------------------------------------------------------------------------------------------------------------------------------------------------------------------------------------------------------------------------------------------------------------------------------------------------------------------------------------------------------------------------------|------------------------------------------------------------------------------------|-----------------------------------------------------------------------------------------------------------------------------------------------------------------------------------------------------------------------------------------------------|
| Howell et al <sup>137</sup> /1983 | RCT           | N = 40; n = 20 in prophylaxis arm | Antepartum prophylaxis UFH 10,000 units bid starting at enrollment (mean, 14 wk; range, 8-37 wk)<br>Postpartum UFH 8,000 units bid for 6 wk | No antepartum prophylaxis<br>Postpartum UFH 8,000 units bid | Bleeding<br>Osteopenia<br>Recurrent VTE                         | 6 wk postpartum | Recurrent VTE<br>Intervention arm: Antepartum, 0/20<br>Postpartum, 0/20<br>Control arm: antepartum, 1/20 (5%; 95% CI, 0.1%-25%); postpartum, 0/20 (0%; 95% CI, 0%-16.8%); estimate of effect size, RR 0.33 (95% CI, 0.01-7.72)<br>Bleeding<br>Intervention arm, 2/20 (10%; 95% CI, 1.24%-31.7%); control arm, 0/20 (0%; 95% CI, 0%-16.8%); estimate of effect size, RR 5.00 (95% CI, 0.26-98.00) | Concealment of allocation adequate                                                 | Primary outcome was side effects (osteopenia, antenatal bleeding) rather than VTE, no ITT analysis, mean gestational age at entry 16 wk (range 8-37 wk), no objective diagnosis of first VTE, no description of diagnostic techniques of recurrence |
| Gates et al <sup>149</sup> /2004  | RCT           | N = 16                            | Enoxaparin 40 mg started from antenatal recruitment until 6 wk postpartum                                                                   | Placebo (1 mL saline)                                       | Symptomatic confirmed VTE<br>Symptomatic osteoporotic fractures | 6 mo postpartum | Recurrent VTE<br>Intervention arm: antepartum, 0/8 (0.0%; 95% CI, 0.0%-36.9%); postpartum, 0/8 (0.0%; 95% CI, 0.0%-36.9%)<br>Control arm: antepartum, 0/8 (0.0%; 95% CI, 0.0%-36.9%); postpartum, 1/8 (12.5%; 95% CI, 3.1%-52.7%); estimate of effect size, RR 0.33 (95% CI, 0.02-7.14)<br>Bleeding: none reported                                                                               | Adequate concealment of allocation<br>Adequate blinding of patients and caregivers | Pilot study, too small to draw any conclusions, recruitment at all gestational ages, the majority > 20 wk, some crossover between groups postpartum                                                                                                 |

(Continued)



**Table S17—Continued**

| Study/Year                          | Type of Study | Participants                                                                                                                                                                                                                             | Intervention                                                                                                                                                                                                     | Control                                                                                                                             | Outcomes                        | Follow-up       | Results                                                                                                                                                                                                  | Strengths                                                              | Limitations |
|-------------------------------------|---------------|------------------------------------------------------------------------------------------------------------------------------------------------------------------------------------------------------------------------------------------|------------------------------------------------------------------------------------------------------------------------------------------------------------------------------------------------------------------|-------------------------------------------------------------------------------------------------------------------------------------|---------------------------------|-----------------|----------------------------------------------------------------------------------------------------------------------------------------------------------------------------------------------------------|------------------------------------------------------------------------|-------------|
| Pettiti<br>et al <sup>4</sup> /1994 | RCT           | n = 102 women with previous proximal VTE or previous distal VTE and protein S and protein C deficiency, activated protein C resistance, or associated with pregnancy or OCP use (three women with VTE during current pregnancy excluded) | Antepartum dalteparin once daily at starting dose of 5,000 International Units (<85 kg) or 7,500 International Units (>85 kg), then dose adjusted to maintain anti-Xa levels > 0.20 units/mL 3 h after injection | Antepartum UFH bid SC starting at 7,500 International Units, then dose adjusted to maintain aPTT 5-15 s above upper limit of normal | Recurrent VTE Bleeding episodes | 6 wk postpartum | <p>Recurrent VTE</p> <p>Dalteparin arm: 0/48</p> <p>UFH arm: 0/54 safety, any bleeding complication</p> <p>Dalteparin arm: 9/50 (18%; 95% CI, 7.0%-29%)</p> <p>UFH arm: 35/55 (64%; 95% CI, 51%-77%)</p> | Concealment of allocation adequate, objectively confirmed previous VTE | Not blinded |

aPTT = activated partial thromboplastin time. See Table S1, S3, S4, S16 for expansion of other abbreviations.

**Table S18—[8.2.2, 8.2.3] Risk of Recurrent VTE in Pregnant Women Receiving Antepartum Thrombosis Prophylaxis: Observational Studies**

| Study/Year                           | Type of Study                       | Participants                                                                                              | Intervention                                                                                                                                                                                                                                              | Outcomes                                                                                                       | Follow-up                          | Results                                                                                                                                                                                            | Strengths                        | Limitations                                                                                                                                         |
|--------------------------------------|-------------------------------------|-----------------------------------------------------------------------------------------------------------|-----------------------------------------------------------------------------------------------------------------------------------------------------------------------------------------------------------------------------------------------------------|----------------------------------------------------------------------------------------------------------------|------------------------------------|----------------------------------------------------------------------------------------------------------------------------------------------------------------------------------------------------|----------------------------------|-----------------------------------------------------------------------------------------------------------------------------------------------------|
| Prospective studies                  |                                     |                                                                                                           |                                                                                                                                                                                                                                                           |                                                                                                                |                                    |                                                                                                                                                                                                    |                                  |                                                                                                                                                     |
| Blombäck et al <sup>16</sup> /1998   | Prospective cohort study            | 25 women with previous VTE                                                                                | Dalteparin weight-adjusted starting dose, then adjusted to target anti-Xa levels of 0.20–0.40 units/mL 3 h postinjection                                                                                                                                  | Recurrent VTE<br>Anti-Xa levels                                                                                | 6 wk postpartum                    | Antepartum recurrent VTE: 0/25 (0%); 95% CI, 0%–13.7%                                                                                                                                              | Objective diagnosis of first VTE | Uncontrolled, 14 women were recruited in the second trimester of pregnancy, 3 women did not complete the study and were withdrawn from the analysis |
| Brennand et al <sup>17</sup> /1999   | Prospective cohort study            | 16 women with an indication for thrombosis prophylaxis during pregnancy; 14 had a history of previous VTE | Enoxaparin 40 mg once daily; postpartum not stated                                                                                                                                                                                                        | Anti-Xa levels<br>Recurrent VTE reported in the article                                                        | Not stated                         | Antepartum: 0/14 (0%); 95% CI, 0%–23.2%<br>Postpartum: 1/14 (7.1%); 95% CI, 0.2%–34%                                                                                                               |                                  | Pharmacodynamic study                                                                                                                               |
| Bauersachs et al <sup>17</sup> /2007 | Prospective cohort management study | 810 pregnant women at increased risk for VTE; 225 with previous VTE                                       | Antepartum clinical surveillance; intermediate- and high-dose dalteparin according to risk stratification based on history (see legend)<br>Women with previous VTE/total: low-risk group, 49/225; high-risk group, 339/469; very-high-risk group, 104/116 | Symptomatic recurrent VTE, clinically relevant bleeding, serious bleeding                                      | Not stated                         | Low-risk group: 0/49 (95% CI, 0%–7.3%)<br>High-risk group: 2/338 (0.6%); 95% CI, 0.0%–2.1%<br>Very-high-risk group: 2/104 (1.9%); 95% CI, 0.2%–6.8%                                                |                                  | Uncontrolled, included women with multiple episodes of VTE, includes women without history of VTE, data in this table deduced from article          |
| Dargaud et al <sup>18</sup> /2009    | Prospective cohort management study | 286 pregnant women at increased risk for VTE; 183 with previous VTE                                       | Antepartum clinical surveillance; enoxaparin 40 mg once daily (60 mg in BMI > 35 kg/m <sup>2</sup> ) starting in the third trimester or starting early in pregnancy according to a risk score (see legend); all in addition to class 2 stockings          | Symptomatic recurrent VTE, bleeding, HIT, symptomatic osteoporosis, serious urticarial rash related to heparin | Not stated, likely 8 wk postpartum | No antenatal LMWH (risk score <3): 0/25 (95% CI, 0%–13.7%)<br>LMWH start in third trimester (risk score 3–5): antepartum, 0/89 (0%); 95% CI, 0%–4.1%); postpartum, 1/89 (1.1%); 95% CI, 0.0%–6.1%) |                                  | Uncontrolled, may have included women with multiple episodes of VTE, included women without history of VTE, data in this table deduced from article |

(Continued)

**Table S18—Continued**

| Study/Year                           | Type of Study            | Participants                                                                                                                                                                                                                   | Intervention                                                                                                                                      | Outcomes                                                        | Follow-up  | Results                                                                                                                                                                                                        | Strengths | Limitations                                                                                                                                         |
|--------------------------------------|--------------------------|--------------------------------------------------------------------------------------------------------------------------------------------------------------------------------------------------------------------------------|---------------------------------------------------------------------------------------------------------------------------------------------------|-----------------------------------------------------------------|------------|----------------------------------------------------------------------------------------------------------------------------------------------------------------------------------------------------------------|-----------|-----------------------------------------------------------------------------------------------------------------------------------------------------|
|                                      |                          |                                                                                                                                                                                                                                | No antenatal LMWH, n = 25<br>Start LMWH in third trimester, n = 89<br>LMWH throughout pregnancy, n = 69                                           |                                                                 |            | LMWH throughout pregnancy (risk score $\geq 6$ ):<br>anteartum, 0/69 (0%; 95% CI, 0%-5.2%);<br>postpartum, 1/69 (1.5%; 95% CI, 0.0%-7.8%)<br>Bleeding: one postpartum hemorrhage in a woman not receiving LMWH |           |                                                                                                                                                     |
| Folkeringa et al <sup>19</sup> /2007 | Prospective cohort study | 55 women from families with antithrombin, protein C, and protein S deficiency; 22 with a history of VTE.<br>19 women received thrombosis prophylaxis during pregnancy; 15 were antithrombin, protein C, or protein S deficient | Adjusted-dose UFH or LMWH before 16 wk of gestation and after 36 wk of gestation, with VKAs in between or adjusted-dose LMWH throughout pregnancy | Fetal loss<br>Symptomatic recurrent VTE reported in the article | Not stated | Not stated whether anteartum or postpartum: 2/19 (10.5%; 95% CI, 1.3%-33.1%)<br>No major bleeding reported                                                                                                     |           | Uncontrolled, may have included women with multiple episodes of VTE, included women without history of VTE, data in this table deduced from article |

(Continued)

**Table S18—Continued**

| Study/Year                         | Type of Study                       | Participants                                                                           | Intervention                                                                                                                                                                                                                                                                                                                                                                                   | Outcomes                                                                 | Follow-up                         | Results                                                                                                                                                                                                                                                                                         | Strengths | Limitations                                                                                                                                                                                                                                                                   |
|------------------------------------|-------------------------------------|----------------------------------------------------------------------------------------|------------------------------------------------------------------------------------------------------------------------------------------------------------------------------------------------------------------------------------------------------------------------------------------------------------------------------------------------------------------------------------------------|--------------------------------------------------------------------------|-----------------------------------|-------------------------------------------------------------------------------------------------------------------------------------------------------------------------------------------------------------------------------------------------------------------------------------------------|-----------|-------------------------------------------------------------------------------------------------------------------------------------------------------------------------------------------------------------------------------------------------------------------------------|
| Rozanski et al <sup>59</sup> /2009 | Prospective cohort management study | 90 pregnant women at increased risk for VTE                                            | Antepartum clinical surveillance in women with previous provoked VTE (major risk factor), n = 30; 37 pregnancies Dalteparin (dose not stated) in women with previous idiopathic VTE n = 60; 99 pregnancies                                                                                                                                                                                     | Symptomatic recurrent VTE                                                | Not stated                        | Previous provoked VTE, clinical surveillance: antepartum recurrent VTE, 1/37 (2.7%); 95% CI, 0.5%-13.8%); postpartum, 0/36 Previous idiopathic VTE, dalteparin: antepartum, recurrent VTE 3/99 (3.0%); 95% CI, 1.0%-8.5%); postpartum, 0/96 Major bleeding: None                                |           | Uncontrolled, abstract only, definition of provoked vs idiopathic previous VTE unclear                                                                                                                                                                                        |
| Retrospective studies              |                                     |                                                                                        |                                                                                                                                                                                                                                                                                                                                                                                                |                                                                          |                                   |                                                                                                                                                                                                                                                                                                 |           |                                                                                                                                                                                                                                                                               |
| Tengborn et al <sup>60</sup> /1989 | Retrospective cohort study          | 72 women with previous VTE, 87 pregnancies; 20 pregnancies with antepartum prophylaxis | Antepartum: UFH 5,000 International Units bid (n = 11), 10,000 International Units bid (n = 1), 12,500 International Units bid (n = 2), Unknown regimen (n = 1) UFH started at median of 16th (range, before conception-30 wk) gestational age Postpartum: UFH, dose not stated (n = 13); dextran, dose not stated (n = 42); UFH and dextran (n = 1); UFH and antithrombin concentrate (n = 1) | Recurrent VTE, superficial thrombophlebitis (not included in this table) | Until postpartum, time not stated | Antepartum: 3/20 (15%, 95% CI, 0%-31%); two occurring in lowest UFH dose; one in woman with antithrombin deficiency who had aPTT-adjusted dose UFH Postpartum: 2/57 (3.5%); 95% CI, 0.4%-12.1%) despite prophylaxis All recurrences in women with previous VTE elicited by pregnancy or OCP use |           | Retrospective, questionnaire data, no objective diagnosis, women with multiple previous episodes of VTE included, some women with hereditary thrombophilia (anticoagulant inhibitor deficiencies, n = 3; defective fibrinolysis, n = 18), potential confounding by indication |

(Continued)

**Table S18—Continued**

| Study/Year                        | Type of Study                                                                               | Participants                                                                | Intervention                                                                                                                                                                  | Outcomes                                                                                                                        | Follow-up  | Results                                                                                                                                                        | Strengths                                                                                                                                                                                                                                                                                                          | Limitations |
|-----------------------------------|---------------------------------------------------------------------------------------------|-----------------------------------------------------------------------------|-------------------------------------------------------------------------------------------------------------------------------------------------------------------------------|---------------------------------------------------------------------------------------------------------------------------------|------------|----------------------------------------------------------------------------------------------------------------------------------------------------------------|--------------------------------------------------------------------------------------------------------------------------------------------------------------------------------------------------------------------------------------------------------------------------------------------------------------------|-------------|
| Sanson et al <sup>17</sup> /1999  | Systematic review of published cohort studies and cohorts from international interest group | 486 pregnancies from 21 reports; 149 pregnancies in women with previous VTE | Several doses and types of LMWH; low-dose defined as < 75 anti-Xa units/kg; intermediate dose defined as 75-150 anti-Xa units/kg; high dose defined as > 150 anti-Xa units/kg | Adverse pregnancy events; adverse fetal/neonatal events<br>Secondary: VTE, thrombocytopenia, osteoporosis, hemorrhagic episodes | Not stated | 3/149 (2%; 95% CI, 0.7-5.6%) had phlebitis; 2 had thrombophilia; 1 had APLAs; 1 low-dose; 2 intermediate-dose                                                  | Review of small case series and ad hoc identified cohorts, potential for publication and reporting bias, risk per dose LMWH cannot be calculated from the published data, diagnostic criteria first and recurrent VTE not stated, number of previous VTE not stated                                                |             |
| Lepercq et al <sup>18</sup> /2001 | Retrospective cohort study                                                                  | 604 women with 649 pregnancies                                              | Several doses and indications of enoxaparin thrombosis prophylaxis in 574 cases                                                                                               | Maternal safety, pregnancy outcome, neonatal safety, VTE recurrence                                                             |            | Antepartum recurrence, n = 5 (denominator unclear), all in women who had had previous VTE in current pregnancy while taking 40 mg Postpartum recurrence, n = 3 | Primary outcome safety rather than recurrent VTE<br>Denominator of women with history of VTE cannot be extracted from the article, unclear whether recurrences are real recurrences or extensions from recent acute VTE, diagnostic criteria first and recurrent VTE not stated, number of previous VTE not stated |             |

(Continued)

**Table S18—Continued**

| Study/Year                         | Type of Study              | Participants                                                                                     | Intervention                                                                                                                                                           | Outcomes                                                                   | Follow-up       | Results                                                                                                                                                                                                   | Strengths                                                                        | Limitations                                                                                     |
|------------------------------------|----------------------------|--------------------------------------------------------------------------------------------------|------------------------------------------------------------------------------------------------------------------------------------------------------------------------|----------------------------------------------------------------------------|-----------------|-----------------------------------------------------------------------------------------------------------------------------------------------------------------------------------------------------------|----------------------------------------------------------------------------------|-------------------------------------------------------------------------------------------------|
| Pabinger et al <sup>17</sup> /2005 | Retrospective cohort study | Unknown number of women with previous VTE who had 87 pregnancies with antepartum prophylaxis     | Antepartum UFH 5,000 bid or low-dose enoxaparin or dalteparin (dose not stated); inconsistent use of postpartum prophylaxis, mainly low-dose LMWH (details not stated) | Cumulative incidence of recurrent VTE antepartum, recurrent VTE postpartum | 6 wk postpartum | Antepartum: 0/87 (0%; 95% CI, 0%-4.1%)<br>Postpartum: overall, 15/284 (5.3%); 95% CI, 3.0%-8.6%; without prophylaxis, 10/187 (5.3%); 95% CI, 2.6%-9.6%; with prophylaxis, 5/97 (5.2%); 95% CI, 1.7%-11.6% | Assessed risk of full pregnancy (ie, including early terminations, miscarriages) | Included women with VTE, not all VTE objectively diagnosed, potential confounding by indication |
|                                    |                            | 284 postpartum periods, including after terminations, miscarriages, stillbirths, and live births |                                                                                                                                                                        |                                                                            |                 |                                                                                                                                                                                                           |                                                                                  |                                                                                                 |

Bauersachs et al<sup>18</sup>: Risk stratification for women with previous VTE: (1) low-risk patients, prior secondary VTE (not associated with thrombophilia, pregnancy, oral contraception); (2) high-risk patients, prior VTE and thrombophilia, prior idiopathic VTE, prior VTE during pregnancy or oral contraception, recurrent secondary VTE; (3) very-high-risk patients, antithrombin deficiency and prior VTE, antiphospholipid syndrome and prior VTE or arterial thromboembolism, acute VTE in current pregnancy after day 11. Dargaud et al<sup>19</sup>: Risk stratification using an individual risk score, see Table 1 in original publication. HIT = heparin-induced thrombocytopenia. See Table S1, S4, S8, S16, and S17 legends for expansion of other abbreviations.

**Table S19—[Section 8.2.2, 8.2.3] Antepartum and Postpartum Prevention of VTE With Prophylactic-Dose LMWH vs No Prophylaxis in Pregnant Women With Prior VTE**

| Participants (Studies), Follow up                                                                                  | Quality Assessment      |                          |                                                      |                                                                           | Summary of Findings |                                         |                                                              |                          |                                                                |
|--------------------------------------------------------------------------------------------------------------------|-------------------------|--------------------------|------------------------------------------------------|---------------------------------------------------------------------------|---------------------|-----------------------------------------|--------------------------------------------------------------|--------------------------|----------------------------------------------------------------|
|                                                                                                                    | Risk of Bias            | Inconsistency            | Indirectness                                         | Imprecision                                                               | Publication Bias    | Overall Quality of Evidence             | Study Event Rates (%)                                        | Relative Effect (95% CI) | Anticipated Absolute Effects During Pregnancy                  |
| 1,953 (6 RCTs), 27-35 d postoperative                                                                              | No serious risk of bias | No serious inconsistency | Serious indirectness <sup>a</sup> orthopedic surgery | Serious imprecision <sup>b</sup> Wide CI for control group risk estimates | Undetected          | Low due to indirectness and imprecision | 36/862 (4.2) Without Prophylaxis<br>15/1,091 (1.4) With LMMH | RR 0.36 (0.20-0.67)      | Risk Without Prophylaxis<br>Risk Difference With LMWH (95% CI) |
| Symptomatic VTE (critical outcome), DVT and PE                                                                     |                         |                          |                                                      |                                                                           |                     |                                         |                                                              |                          |                                                                |
|                                                                                                                    |                         |                          |                                                      |                                                                           |                     |                                         | 20 VTE per 1,000 <sup>c</sup>                                | RR 0.36 (0.20-0.67)      | Low risk (transient risk factor)                               |
|                                                                                                                    |                         |                          |                                                      |                                                                           |                     |                                         | 13 fewer VTE per 1,000 <sup>c</sup>                          |                          | 20 VTE per 1,000 (from 16 fewer to 7 fewer)                    |
| Intermediate and high risk (pregnancy or estrogen related, idiopathic, or multiple prior VTE but discontinued YKA) |                         |                          |                                                      |                                                                           |                     |                                         |                                                              |                          |                                                                |
|                                                                                                                    |                         |                          |                                                      |                                                                           |                     |                                         | 40 VTE per 1,000 <sup>c</sup>                                |                          | 40 VTE per 1,000 (from 32 fewer to 13 fewer)                   |
|                                                                                                                    |                         |                          |                                                      |                                                                           |                     |                                         | 26 fewer VTE per 1,000 <sup>c</sup>                          |                          | 26 fewer VTE per 1,000 (from 32 fewer to 13 fewer)             |

(Continued)

**Table S19—Continued**

| Participants (Studies), Follow up | Quality Assessment      |                          |                                                      |                                                  |                  | Summary of Findings                     |                       |                |                          |                                                       |                                                          |  |
|-----------------------------------|-------------------------|--------------------------|------------------------------------------------------|--------------------------------------------------|------------------|-----------------------------------------|-----------------------|----------------|--------------------------|-------------------------------------------------------|----------------------------------------------------------|--|
|                                   | Risk of Bias            | Inconsistency            | Indirectness                                         | Imprecision                                      | Publication Bias | Overall Quality of Evidence             | Study Event Rates (%) |                | Relative Effect (95% CI) | Anticipated Absolute Effects During Pregnancy         |                                                          |  |
|                                   |                         |                          |                                                      |                                                  |                  |                                         | Without Prophylaxis   | With LMWH      |                          | Risk Without Prophylaxis                              | Risk Difference With LMWH (95% CI)                       |  |
| 5,456 (7 RCTs), 3 wk-9 mo         | No serious risk of bias | No serious inconsistency | Serious indirectness <sup>a</sup> orthopedic surgery | Serious imprecision CI includes benefit and harm | Undetected       | Low due to indirectness and imprecision | 2/1,480 (0.14)        | 6/1,245 (0.48) | RR 0.43 (0.11-1.65)      | 5 bleeding events per 1,000* (from 4 fewer to 3 more) | Antepartum period                                        |  |
|                                   |                         |                          |                                                      |                                                  |                  |                                         |                       |                |                          |                                                       | Postpartum period                                        |  |
|                                   |                         |                          |                                                      |                                                  |                  |                                         |                       |                |                          |                                                       | 20 bleeding events per 1,000* (from 18 fewer to 13 more) |  |

Hull RD et al. Extended out of hospital low molecular weight heparin prophylaxis against deep vein thrombosis in patients after elective hip arthroplasty: a systematic review. *Ann Intern Med.* 2001;135:858-869. Greer IA, Nelson-Piercy C. Low molecular weight heparins for thromboprophylaxis and treatment of venous thromboembolism in pregnancy: a systematic review of safety and efficacy. *Blood.* 2005;106:401-407. See Table S3, S4, S6, S9 legends for expansion of abbreviations.

<sup>a</sup>Population is indirect; the population did not include pregnant women. Different doses of LMWH were used, treatment was initiated variably before or after surgery with a duration of ~7 days (in hospital). Outcomes variably reported. Meta-analysis also provides other outcomes, such as mortality, asymptomatic DVT, and specific bleed outcomes (wound hematoma, transfusion). Follow-up varied among trials from 3 wk to 9 mo.

<sup>b</sup>Baseline risk estimates for VTE in the antepartum and postpartum period come from studies summarized in Table S16. Quality of evidence is rated down because of imprecision in these risk estimates. We consider the distribution of VTE antepartum and postpartum to be equal.

<sup>c</sup>Baseline risk estimates for VTE in the antepartum and postpartum period come from studies summarized in Table S16. We consider the distribution of VTE antepartum and postpartum to be equal. <sup>d</sup>Defined nonfatal maternal hemorrhage (according to section 1.0) as a symptomatic bleeding complication noted during pregnancy or within 6 weeks postpartum that involved bleeding into a critical site, bleeding causing a fall in hemoglobin level of 2 g/dL or more, and bleeding leading to transfusion of ≥2 units of whole blood or red cells.

<sup>e</sup>Baseline risk estimate for major: maternal hemorrhage comes from a systematic review by Greer et al.<sup>38</sup>



**Table S20—[Section 9.2.1-9.2.4] Evidence Profile: Antepartum and Postpartum Prophylactic-Dose LMWH vs No Thromboprophylaxis for Pregnant Women With a Known Thrombophilia**

| Participants (Studies), Follow-up                                                                                                                                                                                                       | Quality Assessment |               |              |             | Summary of Findings |                                         |                                               |                          |                                                                                                       |                                                                                    |
|-----------------------------------------------------------------------------------------------------------------------------------------------------------------------------------------------------------------------------------------|--------------------|---------------|--------------|-------------|---------------------|-----------------------------------------|-----------------------------------------------|--------------------------|-------------------------------------------------------------------------------------------------------|------------------------------------------------------------------------------------|
|                                                                                                                                                                                                                                         | Risk of Bias       | Inconsistency | Indirectness | Imprecision | Publication Bias    | Overall Quality of Evidence             | Study Event Rates (%)                         | Relative Effect (95% CI) | Anticipated Absolute Effects Antepartum and Postpartum (Different Risk Estimates for Bleeding Events) |                                                                                    |
|                                                                                                                                                                                                                                         |                    |               |              |             |                     |                                         | Without Prophylaxis                           | Risk Without Prophylaxis | Risk Difference With LMWH (95% CI)                                                                    |                                                                                    |
| 1,953 (6 RCTs), No serious risk of bias, No serious inconsistency, No serious indirectness, Serious indirectness <sup>a</sup> , Serious orthopedic surgery, Serious imprecision <sup>b</sup> , Wide CI for control group risk estimates |                    |               |              |             | Undetected          | Low due to indirectness and imprecision | 36/862 (4.2)                                  | 15/1,091 (1.4)           | RR 0.36 (0.20-0.67)                                                                                   | Positive family history VTE and heterozygous factor V Leiden or prothrombin 20210A |
|                                                                                                                                                                                                                                         |                    |               |              |             |                     |                                         | 15 VTE per 1,000* (from 12 fewer to 5 fewer)  |                          |                                                                                                       | 15 VTE per 1,000* (from 12 fewer to 5 fewer)                                       |
|                                                                                                                                                                                                                                         |                    |               |              |             |                     |                                         |                                               |                          |                                                                                                       | Positive family history VTE and antithrombin, protein C or protein S deficiency    |
|                                                                                                                                                                                                                                         |                    |               |              |             |                     |                                         | 20 VTE per 1,000* (from 16 fewer to 6 fewer)  |                          |                                                                                                       | 20 VTE per 1,000* (from 16 fewer to 6 fewer)                                       |
|                                                                                                                                                                                                                                         |                    |               |              |             |                     |                                         |                                               |                          |                                                                                                       | Positive family history VTE and homozygous factor V Leiden or prothrombin 20210A   |
|                                                                                                                                                                                                                                         |                    |               |              |             |                     |                                         | 70 VTE per 1,000* (from 56 fewer to 21 fewer) |                          |                                                                                                       | 70 VTE per 1,000* (from 56 fewer to 21 fewer)                                      |
|                                                                                                                                                                                                                                         |                    |               |              |             |                     |                                         |                                               |                          |                                                                                                       | No family history of VTE but homozygous factor V Leiden or prothrombin 20210A      |
|                                                                                                                                                                                                                                         |                    |               |              |             |                     |                                         | 20 VTE per 1,000* (from 16 fewer to 6 fewer)  |                          |                                                                                                       | 20 VTE per 1,000* (from 16 fewer to 6 fewer)                                       |

(Continued)

**Table S20—Continued**

| Participants (Studies), Follow-up | Quality Assessment      |                          |                                         |                                                  | Summary of Findings |                                         |                       |                |                          |                                                                                                                                                                                                                                                                |
|-----------------------------------|-------------------------|--------------------------|-----------------------------------------|--------------------------------------------------|---------------------|-----------------------------------------|-----------------------|----------------|--------------------------|----------------------------------------------------------------------------------------------------------------------------------------------------------------------------------------------------------------------------------------------------------------|
|                                   | Risk of Bias            | Inconsistency            | Indirectness                            | Imprecision                                      | Publication Bias    | Overall Quality of Evidence             | Study Event Rates (%) |                | Relative Effect (95% CI) | Anticipated Absolute Effects Antepartum and Postpartum (Different Risk Estimates for Bleeding Events)                                                                                                                                                          |
|                                   |                         |                          |                                         |                                                  |                     |                                         | Without Prophylaxis   | With LMWH      |                          |                                                                                                                                                                                                                                                                |
| 5,456 (7 RCTs), 3 wk-9 mo         | No serious risk of bias | No serious inconsistency | Serious indirectness orthopedic surgery | Serious imprecision CI includes benefit and harm | Undetected          | Low due to indirectness and imprecision | 2/1,480 (0.14)        | 6/1,245 (0.48) | RR 0.43 (0.11-1.65)      | Antepartum period<br>5 bleeding events per 1,000 <sup>d</sup><br>3 fewer bleeding events per 1,000 (from 4 fewer to 3 more)<br>Postpartum period<br>20 bleeding events per 1,000 <sup>d</sup><br>11 fewer bleeding events per 1,000 (from 18 fewer to 13 more) |

Bibliography: Hull RD, et al. Extended out of hospital low molecular weight heparin prophylaxis against deep vein thrombosis in patients after elective hip arthroplasty: a systematic review. *Ann Intern Med.* 2001;135:858-869. Greer IA, Nelson-Piercy C. Low molecular weight heparins for thromboprophylaxis and treatment of venous thromboembolism in pregnancy: a systematic review of safety and efficacy. *Blood.* 2005;106:401-407. See Table S3, S4, S6, and S9 legends for expansion of abbreviations.

<sup>a</sup>The population did not include pregnant women. Different doses of LMWH were used, treatment was initiated variably before or after surgery with a duration of ~7 days in hospital and 25 days out of hospital. Outcomes were variably reported.

<sup>b</sup>Imprecision in baseline risk estimates for all thrombophilias (see Table S22) results in imprecise anticipated absolute effects.

<sup>c</sup>Baseline risk estimate for VTE comes from observational studies summarized in Table S22. Our antepartum risk estimate is based on assumed equal distribution of antepartum and postpartum VTE events based on data from observational studies (I. A. Greer, MD, personal communication, November 8, 2010).

<sup>d</sup>Baseline risk estimate for major bleeding events antepartum and postpartum come from systematic review by Greer.

**Table S21—[Section 10.2.3. 10.2.4] Randomized Trials and Observational Studies of the Prevention of Complications in Pregnant Women With Thrombophilia: Clinical Description and Results**

| Study/Year                             | Intervention                                           | Number Patients Analyzed     | Length of Follow-up        | Pregnancy Loss (%)                            | Fetal Growth Restriction (%)                 | Preeclampsia (%)                             | Placental Abruption (%) | Maternal Bleeding (%)            | Comments                                                                                            |
|----------------------------------------|--------------------------------------------------------|------------------------------|----------------------------|-----------------------------------------------|----------------------------------------------|----------------------------------------------|-------------------------|----------------------------------|-----------------------------------------------------------------------------------------------------|
| Randomized trials                      |                                                        |                              |                            |                                               |                                              |                                              |                         |                                  |                                                                                                     |
| Thrombophilia-APLA                     |                                                        |                              |                            |                                               |                                              |                                              |                         |                                  |                                                                                                     |
| Aspirin vs placebo                     |                                                        |                              |                            |                                               |                                              |                                              |                         |                                  |                                                                                                     |
| Cowchock and Reece <sup>53</sup> /1997 | Aspirin 81 mg/d                                        | Aspirin = 11                 | Pregnancy loss or delivery | Aspirin = 1/11 (9.1)                          | Aspirin = 0/10                               | NR                                           | NR                      | NR                               |                                                                                                     |
|                                        | Usual care                                             | Usual = 8                    |                            | Usual = 0/8 (RR 2.25 (0.10-49.04))            | Usual = 1/8 (12.5) (RR 0.27 (0.01-5.92))     |                                              |                         |                                  |                                                                                                     |
| Tulppala et al <sup>54</sup> /1997     | Aspirin 50 mg/d                                        | Aspirin = 6                  | Pregnancy loss or delivery | Aspirin = 5/6 (83)                            | NR                                           | NR                                           | NR                      | NR                               | Pregnancy losses include: ASA 1/6 = blighted ovum; control 3/6 = blighted ovum or ectopic pregnancy |
|                                        | Placebo                                                | Placebo = 6                  |                            | Placebo = 3/6 (50.0) (RR 1.20 (0.48-2.99))    |                                              |                                              |                         |                                  |                                                                                                     |
| Pattison et al <sup>55</sup> /2000     | Aspirin 75 mg/d                                        | Aspirin = 20/25 (80.0%)      | Pregnancy loss or delivery | Aspirin = 4/20 (20.0) (15.0)                  | Aspirin = 1/16 (6.2) (23.5)                  | Aspirin = 3/20 (15.0)                        | NR                      | Aspirin = 9/20 (45.0)            | All bleeding events minor                                                                           |
|                                        | Placebo                                                | Placebo = 20/25 (80.0%)      |                            | Placebo = 3/20 (15.0) (RR 1.33 (0.34-5.21))   | Placebo = 4/17 (23.5) (RR 0.27 (0.03- 2.13)) | Placebo = 3/20 (15.0) (RR 1.00 (0.23- 4.37)) | Placebo = 7/20 (35.0)   | RR 1.29 (0.6-2.72)               |                                                                                                     |
| UFH + aspirin vs aspirin alone         |                                                        |                              |                            |                                               |                                              |                                              |                         |                                  |                                                                                                     |
| Rai et al <sup>56</sup> /1997          | UFH 5,000 units SC bid + aspirin 75 mg/d               | UFH + aspirin = 45/45        | Pregnancy loss or delivery | UFH + aspirin = 13/45 (28.9)                  | UFH + aspirin = 3/32 (9.4)                   | UFH + aspirin = 0/32 (0.0)                   | NR                      | NR                               |                                                                                                     |
|                                        | Aspirin 75 mg/d                                        | Aspirin = 45/45              |                            | Aspirin = 26/45 (57.8) (RR 0.50 (0.30- 0.84)) | Aspirin = 1/19 (5.3) (RR 1.78 (0.20-15.93))  | Aspirin = 1/19 (2.2) (RR 0.33 (0.01-7.92))   |                         |                                  |                                                                                                     |
| Goel et al <sup>57</sup> /2006         | UFH 5,000 International Units SC bid + aspirin 80 mg/d | UFH + aspirin = 33/33 (100%) | Pregnancy loss or delivery | Overall: UFH + aspirin = 5/33 (15.2)          | UFH + aspirin = 2/28 (15)                    | UFH + aspirin = 0/28 (0)                     | NR                      | No major bleeding due to heparin | (Continued)                                                                                         |

**Table S21—Continued**

| Study/Year                            | Intervention                                                                                                                    | Number Patients Analyzed      | Length of Follow-up        | Pregnancy Loss (%)                                   | Fetal Growth Restriction (%)    | Preeclampsia (%)            | Placental Abruption (%) | Maternal Bleeding (%)                         | Comments                                          |
|---------------------------------------|---------------------------------------------------------------------------------------------------------------------------------|-------------------------------|----------------------------|------------------------------------------------------|---------------------------------|-----------------------------|-------------------------|-----------------------------------------------|---------------------------------------------------|
|                                       | Aspirin 80 mg/d                                                                                                                 | Aspirin = 39/39 (100%)        |                            | Aspirin = 15/39 (38.5)<br>RR 0.39 (0.16-0.97)        | Aspirin = 1/24 (4.2)            | Aspirin = 2/24 (8.3)        |                         |                                               |                                                   |
|                                       |                                                                                                                                 |                               |                            | First trimester loss:<br>UFH + aspirin = 4/33 (12.1) |                                 |                             |                         |                                               |                                                   |
|                                       |                                                                                                                                 |                               |                            | Aspirin = 13/39 (33.3)                               |                                 |                             |                         |                                               |                                                   |
| Kuttel <sup>58</sup> /1996            | UFH 5,000 units SC bid adjusted to attain 6 h postinjection aPTT at 1.2-1.5 times baseline + aspirin 81 mg/d<br>Aspirin 81 mg/d | UFH + aspirin = 25/25         | Pregnancy loss or delivery | UFH + aspirin = 5/25 (20.0)                          | UFH + aspirin = 3/20 (15.0)     | UFH + aspirin = 2/20 (10.0) | NR                      | UFH + aspirin = 3/20 (15.05)                  | All bleeding events considered minor              |
|                                       |                                                                                                                                 | Aspirin = 25/25               |                            | Aspirin = 14/25 (56.0)<br>RR 0.36 (0.15- 0.84)       | Aspirin = 1/11 (9.1)            | Aspirin = 1/11 (9.1)        |                         | Aspirin = 1/11 (9.1)<br>RR 1.65 (0.19- 14.03) |                                                   |
|                                       |                                                                                                                                 |                               |                            |                                                      | LMWH + aspirin vs aspirin alone |                             |                         |                                               |                                                   |
| Farquharson et al <sup>59</sup> /2002 | LMWH 5,000 units/d SC until delivery + aspirin 75 mg/d<br>Aspirin 75 mg/d                                                       | LMWH + aspirin = 51/51        | Pregnancy loss or delivery | LMWH + aspirin = 11/51 (21.6)                        | NR                              | NR                          | NR                      | NR                                            |                                                   |
|                                       |                                                                                                                                 | Aspirin = 47/47               |                            | Aspirin = 13/47 (27.6)<br>RR 0.78 (0.39- 1.57)       |                                 |                             |                         |                                               |                                                   |
| Laskin et al <sup>60</sup> /2009      | LMWH 5,000 International Units SC daily until delivery + aspirin 81 mg/d                                                        | LMWH + aspirin = 22/22 (100%) | Pregnancy loss or delivery | LMWH + aspirin = 5/22 (22.7)                         | LMWH + aspirin = 3/17 (17.6)    | NR                          | NR                      | NR                                            | Early losses not stratified by thrombophilia type |

(Continued)

**Table S21—Continued**

| Study/Year                          | Intervention                                                                                                                                                                                                                                                                    | Number Patients Analyzed       | Length of Follow-up        | Pregnancy Loss (%)           | Fetal Growth Restriction (%)                                          | Preeclampsia (%)            | Placental Abruption (%) | Maternal Bleeding (%) | Comments    |
|-------------------------------------|---------------------------------------------------------------------------------------------------------------------------------------------------------------------------------------------------------------------------------------------------------------------------------|--------------------------------|----------------------------|------------------------------|-----------------------------------------------------------------------|-----------------------------|-------------------------|-----------------------|-------------|
|                                     | Aspirin 81 mg/d                                                                                                                                                                                                                                                                 | Aspirin = 20/20 (100%)         |                            | Aspirin = 5/20 (25.0)        | Aspirin = 6/15 (40) (IUGR numbers include one twin who was stillborn) |                             |                         |                       |             |
|                                     |                                                                                                                                                                                                                                                                                 |                                |                            | RR 0.91 (0.31-2.68)          |                                                                       |                             |                         |                       |             |
| LMWH + aspirin vs UFH + aspirin     |                                                                                                                                                                                                                                                                                 |                                |                            |                              |                                                                       |                             |                         |                       |             |
| Stephenson et al <sup>6</sup> /2004 | Aspirin 81 mg/d starting prior to conception + LMWH luteal phase or first trimester dalteparin 2,500 International Units SC once daily; second trimester dalteparin 5,000 International Units SC once daily; third trimester dalteparin 7,500 International Units SC once daily | LMWH + aspirin = 14/14 (100.0) | Pregnancy loss or delivery | LMWH + aspirin = 4/13 (30.7) | NR                                                                    | LMWH + aspirin = 1/9 (11.1) | NR                      | NR                    |             |
|                                     | Aspirin 81 mg/d starting prior to conception + UFH luteal phase or first trimester 5,000 units SC bid; second trimester 7,500 units SC bid; third trimester 10,000 units SC bid                                                                                                 | UFH + aspirin = 14/14 (100.0)  |                            | UFH + aspirin = 9/13 (69.2)  |                                                                       | UFH + aspirin = 0/4 (0.0)   |                         |                       |             |
|                                     |                                                                                                                                                                                                                                                                                 |                                |                            | RR 0.44 (0.18-1.08)          |                                                                       | RR 3.00 (0.13-67.52)        |                         |                       | (Continued) |

**Table S21—Continued**

| Study/Year                                            | Intervention                                                                                           | Number Patients Analyzed          | Length of Follow-up        | Pregnancy Loss (%)                      | Fetal Growth Restriction (%) | Preeclampsia (%)          | Placental Abruption (%) | Maternal Bleeding (%)        | Comments                                |
|-------------------------------------------------------|--------------------------------------------------------------------------------------------------------|-----------------------------------|----------------------------|-----------------------------------------|------------------------------|---------------------------|-------------------------|------------------------------|-----------------------------------------|
| Hereditary thrombophilia                              |                                                                                                        |                                   |                            |                                         |                              |                           |                         |                              |                                         |
| LMWH vs aspirin                                       |                                                                                                        |                                   |                            |                                         |                              |                           |                         |                              |                                         |
| Cris et al <sup>62</sup> /2004                        | LMWH (enoxaparin 40 mg/d SC) + folic acid 5 mg/d                                                       | LMWH = 80/80                      | Pregnancy loss or delivery | LMWH = 11/80 (13.7)                     | LMWH = 7/71 (9.9)            | LMWH = 4/71 (5.6)         | NR                      | NR                           |                                         |
|                                                       | Aspirin 100 mg/d + folic acid 5 mg/d                                                                   | Aspirin = 80/80                   |                            | Aspirin = 57/80 (71.2)                  | Aspirin = 7/23 (30.4)        | Aspirin = 3/23 (13)       |                         |                              |                                         |
|                                                       |                                                                                                        |                                   |                            | RR 0.19 (0.11- 0.34)                    | RR 0.32 (0.13-0.83)          | RR 1.33 (4.77-0.69)       |                         |                              |                                         |
| Observational Studies                                 |                                                                                                        |                                   |                            |                                         |                              |                           |                         |                              |                                         |
| Thrombophilia—APLA                                    |                                                                                                        |                                   |                            |                                         |                              |                           |                         |                              |                                         |
| LMWH + aspirin vs UFH + aspirin                       |                                                                                                        |                                   |                            |                                         |                              |                           |                         |                              |                                         |
| Noble et al <sup>63</sup> /2005                       | Aspirin 81 mg daily starting prior to conception + LMWH (enoxaparin 40 mg/d SC)                        | LMWH + aspirin = 25/25            | 2 wk postdelivery          | LMWH + aspirin = 4/25 (16.0)            | LMWH + aspirin = 1/21 (4.8)  | LMWH + aspirin = 0/21 (0) | NR                      | LMWH + aspirin = 3/25 (12.0) | All bleeding events classified as minor |
|                                                       | Aspirin 81 mg daily starting prior to conception + UFH (5,000-6,000 units SC bid, depending on weight) | UFH + aspirin = 25/25             |                            | UFH + aspirin = 5/25 (20.0)             | UFH + aspirin = 1/20 (5.0)   | UFH + aspirin = 0/20 (0)  |                         | UFH + aspirin = 2/25 (5.0)   |                                         |
|                                                       |                                                                                                        |                                   |                            | RR 0.80 (0.24-2.64)                     | RR 0.95 (0.06-14.22)         | RR 1.00 (0.02-48.53)      |                         | RR 1.5 (0.27-8.22)           |                                         |
| UFH higher dose + aspirin vs UFH lower dose + aspirin |                                                                                                        |                                   |                            |                                         |                              |                           |                         |                              |                                         |
| Kutteh and Ermele <sup>64</sup> /1996                 | UFH 5,000 units SC bid adjusted to maintain aPTT at 1.2-1.5 × baseline (higher dose) + aspirin 81 mg/d | UFH higher dose + aspirin = 25/25 | Pregnancy loss or delivery | UFH higher dose + aspirin = 5/25 (20.0) | NR                           | NR                        | NR                      | NR                           |                                         |

(Continued)

**Table S21—Continued**

| Study/Year                        | Intervention                                                                                             | Number Patients Analyzed                      | Length of Follow-up        | Pregnancy Loss (%)                                 | Fetal Growth Restriction (%)    | Preeclampsia (%)                          | Placental Abruption (%)                                 | Maternal Bleeding (%)                            | Comments                                                                                                                                                                          |
|-----------------------------------|----------------------------------------------------------------------------------------------------------|-----------------------------------------------|----------------------------|----------------------------------------------------|---------------------------------|-------------------------------------------|---------------------------------------------------------|--------------------------------------------------|-----------------------------------------------------------------------------------------------------------------------------------------------------------------------------------|
|                                   | UFH 5,000 units SC bid adjusted to maintain aPTT at upper limit of normal (lower dose) + aspirin 81 mg/d | UFH lower dose + aspirin = 25/25              |                            | UFH lower dose + aspirin = 6/25 (24.0)             |                                 |                                           |                                                         |                                                  |                                                                                                                                                                                   |
|                                   |                                                                                                          |                                               |                            | RR 0.83 (0.29-2.38)                                |                                 |                                           |                                                         |                                                  |                                                                                                                                                                                   |
| Hereditary thrombophilia          |                                                                                                          |                                               |                            |                                                    |                                 |                                           |                                                         |                                                  |                                                                                                                                                                                   |
| LMWH vs control                   |                                                                                                          |                                               |                            |                                                    |                                 |                                           |                                                         |                                                  |                                                                                                                                                                                   |
| Carp et al <sup>(69)</sup> /2003  | LMWH (enoxaparin 40 mg/d SC)<br>Retrospective control (no prophylaxis)                                   | LMWH = 37/37 (100%)<br>Control = 48/48 (100%) | Pregnancy loss or delivery | LMWH = 11/37 (29.7)<br>Control = 27/48 (56.3)      | NR                              | LMWH = 2/26 (7.6)<br>Control = 1/21 (4.8) | NR                                                      | NR                                               |                                                                                                                                                                                   |
|                                   |                                                                                                          |                                               |                            | RR 1.89 (1.09-3.29)                                |                                 | RR 2.00 (0.19-0.72)                       |                                                         |                                                  |                                                                                                                                                                                   |
| LMWH vs control (untreated)       |                                                                                                          |                                               |                            |                                                    |                                 |                                           |                                                         |                                                  |                                                                                                                                                                                   |
| Leduc et al <sup>(66)</sup> /2007 | LMWH (dalteparin) varied between 3,500 and 7,500 International Units SC bid Aspirin 80 mg/d              | LMWH = 13/13 (100%)<br>Aspirin = 11/11 (100%) | Chart review 1994-2001     | Data on pregnancy loss not stratified by treatment | LMWH OR 0.81<br>Aspirin OR 0.88 | LMWH OR 0.92<br>Aspirin OR 0.87           | Data on placental abruption not stratified by treatment | No major bleeding or maternal mortality reported | OR: the probability of developing an obstetric complication despite prophylactic therapy (interpreted to mean the odds of complication compared with no treatment)<br>(Continued) |

**Table S21—Continued**

| Study/Year                      | Intervention                                                                                                                                                   | Number Patients Analyzed                                | Length of Follow-up    | Pregnancy Loss (%) | Fetal Growth Restriction (%) | Preeclampsia (%)       | Placental Abruption (%) | Maternal Bleeding (%) | Comments                                                                                                                                                           |
|---------------------------------|----------------------------------------------------------------------------------------------------------------------------------------------------------------|---------------------------------------------------------|------------------------|--------------------|------------------------------|------------------------|-------------------------|-----------------------|--------------------------------------------------------------------------------------------------------------------------------------------------------------------|
| Leduc et al <sup>66</sup> /2007 | LMWH (dalteparin) varied between 3500 IU SC and 7500 IU SC bid + aspirin 80 mg/d<br>LMWH (dalteparin) varied between 3500 and 7,500 International Units SC bid | LMWH + aspirin = 26/26 (100%)<br>LMWH = 13/13 (100%)    | Chart review 1994-2001 | NR                 | LMWH + aspirin OR 0.70       | LMWH + aspirin OR 0.80 | NR                      | NR                    | OR: the probability of developing an obstetric complication despite prophylactic therapy (interpreted to mean the odds of complication compared with no treatment) |
| Aspirin vs control (untreated)  |                                                                                                                                                                |                                                         |                        |                    |                              |                        |                         |                       |                                                                                                                                                                    |
| Leduc et al <sup>66</sup> /2007 | LMWH (dalteparin) varied between 3,500 and 7,500 International Units SC bid + aspirin 80 mg/d<br>Aspirin 80 mg/d                                               | LMWH + aspirin = 26/26 (100%)<br>Aspirin = 11/11 (100%) | Chart review 1994-2001 | NR                 | LMWH + aspirin OR 0.70       | LMWH + aspirin OR 0.80 | NR                      | NR                    | OR: the probability of developing an obstetric complication despite prophylactic therapy (interpreted to mean the odds of complication compared with no treatment) |

ASA = acetylsalicylic acid; IUGR = intrauterine growth restriction; NR = not reported. See Table S1, S3, S4, S8, S9, and S17 legends for expansion of other abbreviations.



**Table S22—[Section 10.2.3, 10.2.4] Randomized Trials and Observational Studies of the Prevention of Complications in Pregnant Women With Thrombophilia: Methodologic Quality**

| Randomized Trials                  |                                                             |                     |                     |                                                                                                |                                                                                              |          |                                                                                                                                                                                                                                                                                                             |
|------------------------------------|-------------------------------------------------------------|---------------------|---------------------|------------------------------------------------------------------------------------------------|----------------------------------------------------------------------------------------------|----------|-------------------------------------------------------------------------------------------------------------------------------------------------------------------------------------------------------------------------------------------------------------------------------------------------------------|
| Study/Year                         | Intervention                                                | Study Design        | Randomize Concealed | Blinding                                                                                       | Lost to Follow-up                                                                            | Analysis | Comments                                                                                                                                                                                                                                                                                                    |
| Thrombophilia-APLA                 |                                                             |                     |                     |                                                                                                |                                                                                              |          |                                                                                                                                                                                                                                                                                                             |
| Aspirin vs placebo                 |                                                             |                     |                     |                                                                                                |                                                                                              |          |                                                                                                                                                                                                                                                                                                             |
| Cowchock et al <sup>53</sup> /1997 | Aspirin 81 mg/d<br>Usual care                               | RCT,<br>multicenter | PN                  | Patients: PN<br>Caregivers: PN<br>Data Collectors: PN<br>Adjudicators: PN<br>Data Analysts: PN | Aspirin = 0/11<br>Usual care = 0/9                                                           | ITT      | Population: pregnant women with APLA and either 0 (10/19 patients) or 1 (9/19 patients) prior spontaneous abortion. Women with thrombosis history or lupus excluded.<br>No definition of usual care.                                                                                                        |
| Tullpala et al <sup>54</sup> /1997 | Aspirin 50 mg/d<br>Placebo                                  | RCT, single center  | PY                  | Patients: CY<br>Caregivers: PY<br>Data Collectors: PY<br>Adjudicators: PN<br>Data Analysts: PN | Aspirin = 0/6<br>Placebo = 0/6                                                               | ITT      | Population: subgroup of 66 pregnant women with three to eight consecutive losses; 12 pregnant women with APLA of whom two had blighted ova (one in each treatment arm), and two had ectopic pregnancies (placebo group).                                                                                    |
| Pattison et al <sup>55</sup> /2000 | Aspirin 75 mg/d<br>Placebo                                  | RCT, single center  | CY                  | Patients: CY<br>Caregivers: CY<br>Data Collectors: CY<br>Adjudicators: PN<br>Data Analysts: PN | Aspirin = 5/25<br>Placebo = 5/25<br>(5 postrandomization exclusions from each treatment arm) | Not ITT  | Population: pregnant women with APLA and three or more fetal losses. Women with thrombosis history or lupus excluded.<br>Ten exclusions after randomization because of inappropriate inclusion. Randomization not balanced for mean gravidity and number of first trimester losses (both favoring aspirin). |
| UFH + aspirin vs aspirin alone     |                                                             |                     |                     |                                                                                                |                                                                                              |          |                                                                                                                                                                                                                                                                                                             |
| Rai et al <sup>56</sup> /1997      | UFH 5,000 units SC bid + aspirin 75 mg/d<br>Aspirin 75 mg/d | RCT, single center  | PN                  | Patients: CN<br>Caregivers: CN<br>Data Collectors: PN<br>Adjudicators: PN<br>Data Analysts: PN | UFH + aspirin = 0/45<br>Aspirin = 0/45                                                       | ITT      | Population: pregnant women with APLA and three or more consecutive miscarriages. Women with prior thrombosis or lupus excluded.<br>Treatment stopped at 34 wk or miscarriage.                                                                                                                               |

(Continued)

**Table S22—Continued**

| Randomized Trials                     |                                                                                                                                 |                                |                     |                                                                                                |                                                   |          |                                                                                                                                                                                                                                           |
|---------------------------------------|---------------------------------------------------------------------------------------------------------------------------------|--------------------------------|---------------------|------------------------------------------------------------------------------------------------|---------------------------------------------------|----------|-------------------------------------------------------------------------------------------------------------------------------------------------------------------------------------------------------------------------------------------|
| Study/Year                            | Intervention                                                                                                                    | Study Design                   | Randomize Concealed | Blinding                                                                                       | Lost to Follow-up                                 | Analysis | Comments                                                                                                                                                                                                                                  |
| Coel et al <sup>57</sup> /2006        | UFH 5,000 International Units SC bid + aspirin 80 mg/d<br>Aspirin 80 mg/d                                                       | RCT, multicenter               | NR                  | Patients: DN<br>Caregivers: DN<br>Data Collectors: PN<br>Adjudicators: PN<br>Data Analysts: PN | UFH + aspirin = 0/39<br>Aspirin = 0/33            | ITT      | Population: pregnant women with APLA (anticoagulation) with two or more first or second trimester miscarriages.<br>Treatment discontinued at 36 wk gestation.                                                                             |
| Kuttel <sup>58</sup> /1996            | UFH 5,000 units SC bid adjusted to attain 6 h postinjection aPTT at 1.2-1.5 times baseline + aspirin 81 mg/d<br>Aspirin 81 mg/d | RCT, single center             | Quasi-randomized    | Patients: DN<br>Caregivers: DN<br>Data Collectors: PN<br>Adjudicators: PN<br>Data Analysts: PN | UFH + aspirin = 0/25<br>Aspirin = 0/25            | No       | Population: pregnant women with APLA and three or more consecutive miscarriages (women with NSI or lupus excluded).<br>Alternate assignment of treatment. USPSTF rating of evidence is II-1.                                              |
| LMWH + aspirin vs aspirin alone       |                                                                                                                                 |                                |                     |                                                                                                |                                                   |          |                                                                                                                                                                                                                                           |
| Farquharson et al <sup>59</sup> /2002 | LMWH 5,000 units/d SC until delivery + aspirin 75 mg/d<br>Aspirin 75 mg/d                                                       | RCT, single center             | CY                  | Patients: CN<br>Caregivers: CN<br>Data Collectors: CN<br>Adjudicators: CN<br>Data Analysts: CN | LMWH = 0/51<br>Aspirin = 0/47                     | ITT      | Population: pregnant women with APLA and at least three consecutive losses or two losses with fetal death after 10 wk.                                                                                                                    |
| Laskin et al <sup>60</sup> /2009      | LMWH 5,000 International Units SC daily until delivery + aspirin 81 mg/d<br>Aspirin 81 mg/d                                     | Open label, RCT, single center | Not NR              | Patients: DN<br>Caregivers: DN<br>Data Collectors: PN<br>Adjudicators: PN<br>Data Analysts: PN | LMWH + aspirin = 0/22 (0%)<br>Aspirin = 0/20 (0%) | ITT      | Population: pregnant women with APLA or inherited thrombophilia or ANA (only APLA able to be considered here) with two or more unexplained consecutive pregnancy losses prior to 32 wk. Treatment with LMWH stopped at 35 wk or delivery. |

(Continued)

**Table S22—Continued**

| Randomized Trials                    |                                                                                                                                                                                                                                                                                                                                                                                                                                                                        |                                |                     |                                                                                                                                   |                                                                                |                     |                                                                                                                                                                                                                         |
|--------------------------------------|------------------------------------------------------------------------------------------------------------------------------------------------------------------------------------------------------------------------------------------------------------------------------------------------------------------------------------------------------------------------------------------------------------------------------------------------------------------------|--------------------------------|---------------------|-----------------------------------------------------------------------------------------------------------------------------------|--------------------------------------------------------------------------------|---------------------|-------------------------------------------------------------------------------------------------------------------------------------------------------------------------------------------------------------------------|
| Study/Year                           | Intervention                                                                                                                                                                                                                                                                                                                                                                                                                                                           | Study Design                   | Randomize Concealed | Blinding                                                                                                                          | Lost to Follow-up                                                              | Analysis            | Comments                                                                                                                                                                                                                |
| Stephenson et al <sup>61</sup> /2004 | Aspirin 81 mg/d starting prior to conception + LMWH (luteal phase or first trimester dalteparin 2,500 International Units SC once daily; second trimester dalteparin 5,000 International Units SC once daily; third trimester dalteparin 7,500 International Units SC once daily)<br>Aspirin 81 mg/d starting prior to conception + UFH (luteal phase or first trimester 5,000 units SC bid; second trimester 7,500 units SC bid; third trimester 10,000 units SC bid) | Open-label, RCT, single center | CY                  | LMWH + aspirin vs UFH + aspirin<br>Patients: CN<br>Caregivers: CN<br>Data Collectors: CN<br>Adjudicators: PN<br>Data Analysts: PN | In patients who became pregnant: LMWH + aspirin = 0/13<br>UFH + aspirin = 0/13 | Unclear whether ITT | Population: women with APLA and recurrent losses.<br>Patients randomized prior to conception (one patient in each group did not become pregnant during study).<br>Hereditary thrombophilia.                             |
| Hereditary thrombophilia             |                                                                                                                                                                                                                                                                                                                                                                                                                                                                        |                                |                     |                                                                                                                                   |                                                                                |                     |                                                                                                                                                                                                                         |
| Gris et al <sup>62</sup> /2004       | LMWH (enoxaparin 40 mg/d SC) and folic acid 5 mg/d<br>Aspirin 100 mg/d and folic acid 5 mg/d                                                                                                                                                                                                                                                                                                                                                                           | RCT                            | CY                  | LMWH vs aspirin alone<br>Patients: CN<br>Caregivers: CN<br>Data Collectors: PN<br>Adjudicators: PN<br>Data Analysts: PN           | 14/174 (8%) lost prior to allocation<br>LMWH = 0/80<br>Aspirin = 0/80          | Unclear whether ITT | Population: women with factor V Leiden, prothrombin gene mutation, or protein S deficiency and a single loss after 10 wk.<br>Women with other hereditary thrombophilia, lupus, APLA, or prior thrombosis were excluded. |

(Continued)

**Table S22—Continued**

| Observational Studies                                 |                                                                                                                                                                                                                           |                                   |                                       |                                          |                        |                                                                                                                                                                                                                                                                                  |
|-------------------------------------------------------|---------------------------------------------------------------------------------------------------------------------------------------------------------------------------------------------------------------------------|-----------------------------------|---------------------------------------|------------------------------------------|------------------------|----------------------------------------------------------------------------------------------------------------------------------------------------------------------------------------------------------------------------------------------------------------------------------|
| Study/Year                                            | Intervention                                                                                                                                                                                                              | Study Design                      | Intervention/Control Setting Similar? | Intervention/Control Time Frame Similar? | Adjustment             | Effectively Blinded Assessment of Outcome                                                                                                                                                                                                                                        |
| Noble et al <sup>65</sup> /2005                       | Aspirin 81 mg/d starting prior to conception + LMWH (enoxaparin 40 mg/d SC) Aspirin 81 mg/d starting prior to conception + UFH (5,000-6,000 units SC bid, depending on weight)                                            | Prospective cohort, two center    | Very                                  | Identical                                | All relevant variables | No                                                                                                                                                                                                                                                                               |
|                                                       |                                                                                                                                                                                                                           |                                   |                                       |                                          |                        | Population: women with APLA and three or more pregnancy losses before 20 wk.<br>Treatment regimen based on enrolling center.<br>LMWH stopped 3 wk before estimated due date or 5 d prior to scheduled induction or cesarean section.<br>UFH discontinued with spontaneous labor. |
| UFH higher dose + aspirin vs UFH lower dose + aspirin |                                                                                                                                                                                                                           |                                   |                                       |                                          |                        |                                                                                                                                                                                                                                                                                  |
| Kutteh and Ermej <sup>64</sup> /1996                  | UFH 5,000 units SC bid adjusted to maintain aPTT at 1.2 to 1.5 times baseline (higher dose) + aspirin 81 mg/d<br>UFH 5,000 units SC bid adjusted to maintain aPTT at upper limit of normal (lower dose) + aspirin 81 mg/d | Prospective cohort, single center | Very                                  | Close                                    | All relevant variables | No                                                                                                                                                                                                                                                                               |
|                                                       |                                                                                                                                                                                                                           |                                   |                                       |                                          |                        | Population: pregnant women with APLA and at least three consecutive miscarriages. Women with NSI or lupus excluded.<br>Alternate assignment of treatments.                                                                                                                       |

(Continued)

**Table S22—Continued**

| Observational Studies             |                                                                                                                                                                                                 |                                     |                                       |                                          |                                            |                                           |                                                                                                                                                                                                                                                                                                                                                             |
|-----------------------------------|-------------------------------------------------------------------------------------------------------------------------------------------------------------------------------------------------|-------------------------------------|---------------------------------------|------------------------------------------|--------------------------------------------|-------------------------------------------|-------------------------------------------------------------------------------------------------------------------------------------------------------------------------------------------------------------------------------------------------------------------------------------------------------------------------------------------------------------|
| Study/Year                        | Intervention                                                                                                                                                                                    | Study Design                        | Intervention/Control Setting Similar? | Intervention/Control Time Frame Similar? | Adjustment                                 | Effectively Blinded Assessment of Outcome |                                                                                                                                                                                                                                                                                                                                                             |
|                                   |                                                                                                                                                                                                 |                                     |                                       |                                          |                                            | Lost to Follow-up                         | Comments                                                                                                                                                                                                                                                                                                                                                    |
| Hereditary thrombophilia          |                                                                                                                                                                                                 |                                     |                                       |                                          |                                            |                                           |                                                                                                                                                                                                                                                                                                                                                             |
| LMWH vs control                   |                                                                                                                                                                                                 |                                     |                                       |                                          |                                            |                                           |                                                                                                                                                                                                                                                                                                                                                             |
| Carp et al <sup>65</sup> /2003    | LMWH (enoxaparin 40 mg/d SC)<br>Retrospective control (no prophylaxis)                                                                                                                          | Prospective cohort, single center   | Very                                  | Close                                    | Most                                       | No                                        | Population: women with hereditary thrombophilia and three or more consecutive losses in first or second trimesters. Patients were excluded if prior thrombosis or APLA. Controls were women retrieved from a database, matched for number of miscarriages, maternal age, and time taken to conceive.                                                        |
|                                   |                                                                                                                                                                                                 |                                     |                                       |                                          |                                            |                                           | LMWH = 0/37<br>Control = 0/48                                                                                                                                                                                                                                                                                                                               |
| LMWH + aspirin vs aspirin vs LMWH |                                                                                                                                                                                                 |                                     |                                       |                                          |                                            |                                           |                                                                                                                                                                                                                                                                                                                                                             |
| Leduc et al <sup>66</sup> /2007   | LMWH (dalteparin) varied between 3,500 and 7,500 International Units SC bid + aspirin 80 mg/d<br>Aspirin 80 mg/d<br>LMWH (dalteparin) varied between 3,500 and 7,500 International Units SC bid | Retrospective cohort, single center | Very                                  | Identical                                | Some: use of LMWH or ASA and gestation age | No                                        | Population: women who received antithrombotic prophylaxis during pregnancy between 1997 and 2001 or a history of previous pregnancy complicated by severe preeclampsia, placental abruption, fetal growth restriction, second or third trimester fetal loss, and associated hereditary thrombophilia. Excluded if previous thromboembolic disorder or APLA. |
|                                   |                                                                                                                                                                                                 |                                     |                                       |                                          |                                            |                                           | LMWH + aspirin = 0/26<br>Aspirin = 0/11<br>LMWH = 0/13                                                                                                                                                                                                                                                                                                      |

ANA = antinuclear antibody; CY = certain yes; DN = definite no; NSI = nonspecific inhibitor; PN = probable no; PY = probable yes. See Table S1, S4, S8, S9, and legends S17 for expansion of other abbreviations.

**Table S23—[Section 10.2.1,10.2.3] Evidence Profile: Should UFH Plus Aspirin or Aspirin Alone Be Used for Pregnant Women With APLA and Recurrent Pregnancy Loss?**

| Participants (Studies), Follow-up | Quality Assessment                                                                    |                          |                         |                                                                    |                  | Summary of Findings                          |                           |                    |                                           |                                |                                                                    |
|-----------------------------------|---------------------------------------------------------------------------------------|--------------------------|-------------------------|--------------------------------------------------------------------|------------------|----------------------------------------------|---------------------------|--------------------|-------------------------------------------|--------------------------------|--------------------------------------------------------------------|
|                                   | Risk of Bias                                                                          | Inconsistency            | Indirectness            | Imprecision                                                        | Publication Bias | Overall Quality of Evidence                  | Study Event Rates (%)     |                    | Anticipated Absolute Effects <sup>a</sup> |                                |                                                                    |
|                                   |                                                                                       |                          |                         |                                                                    |                  |                                              | With Aspirin <sup>b</sup> | With UFH + Aspirin | Relative Effect (95% CI)                  | Risk With Aspirin <sup>b</sup> | Risk Difference With Addition of UFH (95% CI)                      |
| 212 (3 RCTs), not reported        | Serious risk of bias<br>Issues of randomization, allocation concealment, and blinding | No serious inconsistency | No serious indirectness | No serious imprecision                                             | Undetected       | Moderate due to risk of bias                 | 55/109 (50)               | 23/103 (22)        | RR 0.44 (0.30-0.66)                       | 500 pregnancy losses per 1,000 | 283 fewer pregnancy losses per 1,000 (from 172 fewer to 353 fewer) |
| 134 (3 RCTs), not reported        | Serious risk of bias<br>Issues of randomization, allocation concealment, and blinding | No serious inconsistency | No serious indirectness | Very serious imprecision<br>CI includes important benefit and harm | Undetected       | Very low due to risk of bias and imprecision | 3/54 (5.6)                | 8/80 (10)          | RR 1.71 (0.48-6.17)                       | 56 IUGR per 1,000              | 39 more IUGR per 1,000 (from 29 fewer to 287 more)                 |

(Continued)

**Table S23—Continued**

| Participants (Studies), Follow-up | Quality Assessment                                                                    |                          |                         |                                                               |                  | Summary of Findings                     |                           |                    |                                           |                                |                                                            |
|-----------------------------------|---------------------------------------------------------------------------------------|--------------------------|-------------------------|---------------------------------------------------------------|------------------|-----------------------------------------|---------------------------|--------------------|-------------------------------------------|--------------------------------|------------------------------------------------------------|
|                                   | Risk of Bias                                                                          | Inconsistency            | Indirectness            | Imprecision                                                   | Publication Bias | Overall Quality of Evidence             | Study Event Rates (%)     |                    | Anticipated Absolute Effects <sup>a</sup> |                                |                                                            |
|                                   |                                                                                       |                          |                         |                                                               |                  |                                         | With Aspirin <sup>b</sup> | With UFH + Aspirin | Relative Effect (95% CI)                  | Risk With Aspirin <sup>b</sup> | Risk Difference With Addition of UFH (95% CI)              |
| 134 (3 RCTs), not reported        | Serious risk of bias<br>Issues of randomization, allocation concealment, and blinding | No serious inconsistency | No serious indirectness | Serious imprecision<br>CI includes important benefit and harm | Undetected       | Low due to risk of bias and imprecision | 4/54 (7.4)                | 2/80 (2.5)         | RR 0.43 (0.09-2.08)                       | 74 preeclampsia per 1,000      | 42 fewer preeclampsia per 1,000 (from 67 fewer to 80 more) |

Major Bleeding (critical outcome) not reported<sup>c</sup>

**Bibliography:** Data from unpublished meta-analysis based on three trials: Kuttch WH. Antiphospholipid antibody-associated recurrent pregnancy loss: treatment with heparin and low-dose aspirin is superior to low-dose aspirin alone. *Am J Obstet Gynecol.* 1996;174:1584-1589. Rai R, Cohen H, Dave M, et al. Randomised controlled trial of aspirin and aspirin plus heparin in pregnant women with recurrent miscarriage associated with phospholipid antibodies (or antiphospholipid antibodies). *BMJ.* 1997;314:253-257. Goel N, Tuli A, Choudhry R. The role of aspirin versus aspirin and heparin in cases of recurrent abortions with raised anticardiolipin antibodies. *Med Sci Monit.* 2006(3):CR132-CR136. PO Vandvik, MD, personal communication, October 2010. See Table S1, S3, S9, and S21 legends for expansion of abbreviation.

<sup>a</sup>Time frame is 9 mo for all outcomes.

<sup>b</sup>Estimates for baseline risk with aspirin comes from the meta-analysis of three trials.

<sup>c</sup>Although a patient important outcome defined as in 1, none of the three trials reported major bleeding events.

**Table S24—[Section 11.1.1] Evidence Profile: Should Aspirin Rather Than No Treatment Be Used for Prevention of Preeclampsia in Women Without Thrombophilia?**

| Participants (Studies), Follow-up | Quality Assessment                                                                        |                                                                  |                                                                                |                                                           | Summary of Findings |                               |                                                                            |                          |                                                                                         |
|-----------------------------------|-------------------------------------------------------------------------------------------|------------------------------------------------------------------|--------------------------------------------------------------------------------|-----------------------------------------------------------|---------------------|-------------------------------|----------------------------------------------------------------------------|--------------------------|-----------------------------------------------------------------------------------------|
|                                   | Risk of Bias                                                                              | Inconsistency                                                    | Indirectness                                                                   | Imprecision                                               | Publication Bias    | Overall Quality of Evidence   | Study Event Rates (%)                                                      | Relative Effect (95% CI) | Anticipated Absolute Effects During Pregnancy                                           |
| 32,590 (43 RCTs), not reported    | No serious risk of bias<br>Variability across trials but not considered to introduce bias | Serious inconsistency <sup>a</sup><br>$I^2 = 46$ ,<br>$P < .001$ | No serious indirectness                                                        | No serious imprecision<br>Benefit even at lower end of CI | Undetected          | Moderate due to inconsistency | 1,292/16,194 (8)<br>Without Prophylaxis<br>1,081/16,396 (6.6)<br>With LWMH | RR 0.83 (0.77-0.89)      | Low risk for preeclampsia<br>60 cases per 1,000 <sup>b</sup> (from 14 fewer to 7 fewer) |
| 95,000 (6 RCTs), 3.8-10 y         | No serious risk of bias                                                                   | No serious inconsistency                                         | Serious indirectness <sup>d</sup><br>Primary prevention cardiovascular disease | No serious imprecision                                    | Undetected          | Moderate due to indirectness  | 219/47,500 (0.5)<br>335/47,500 (0.7)                                       | RR 1.54 (1.30-1.82)      | High risk for preeclampsia<br>210 per 1,000 <sup>b</sup> (from 46 fewer to 23 fewer)    |

**Bibliography:** Duley L, Henderson-Smart DJ, Meher S, King JF. Antiplatelet agents for preventing pre-eclampsia and its complications. *Cochrane Database Syst Rev.* 2007;(2):CD004659. Greer IA, Nelson-Piercy C. Low molecular weight heparins for thromboprophylaxis and treatment of venous thromboembolism in pregnancy: a systematic review of safety and efficacy. *Blood.* 2005;106:401-407. See Table S3, S4, and S9 legends for expansion of abbreviations.

<sup>a</sup>Heterogeneity might be related to different types and doses of antiplatelet agents, the lack of placebo in the control group in many of the trials, different populations of pregnant women concerning risk of preeclampsia, and effect of treatment.

<sup>b</sup>Control group risk estimate for preeclampsia is based on control event rates in studies included in subgroup analyses in the meta-analysis. High risk was defined in the systematic review as women who either were normotensive or had chronic hypertension without superimposed preeclampsia at trial entry and were classified as being at high risk if they had one or more of the following: previous severe preeclampsia, diabetes, chronic hypertension, renal disease, or autoimmune disease.

<sup>c</sup>Major antenatal maternal hemorrhage.

<sup>d</sup>Rated down for indirectness due to population (people included in trials of primary prevention cardiovascular disease). The Cochrane review does not report the effects of antiplatelet therapy on major bleeding events in pregnant women.

<sup>e</sup>Control group risk estimate for major bleeding events antepartum from systematic review by Greer et al.



**Table S25—[Section 11.2.1] Evidence Profile: Should LMWH and Aspirin Rather Than No Treatment Be Used for Prevention of Recurrent Pregnancy Loss in Women Without Thrombophilia?**

| Participants (Studies), Follow-up | Quality Assessment      |                          |                         |                                                               |                  | Summary of Findings                                              |                       |                       |                          |                                                                                                                                                              |
|-----------------------------------|-------------------------|--------------------------|-------------------------|---------------------------------------------------------------|------------------|------------------------------------------------------------------|-----------------------|-----------------------|--------------------------|--------------------------------------------------------------------------------------------------------------------------------------------------------------|
|                                   | Risk of Bias            | Inconsistency            | Indirectness            | Imprecision                                                   | Publication Bias | Overall Quality of Evidence                                      | Study Event Rates (%) |                       | Relative Effect (95% CI) | Anticipated Absolute Effects During Pregnancy                                                                                                                |
| 294 (2 RCTs), 9 mo                | No serious risk of bias | No serious inconsistency | No serious indirectness | Serious imprecision<br>CI includes important benefit and harm | Undetected       | Miscarriage (critical outcome)<br>Moderate due to imprecision    | Without Treatment     | With LMWH and Aspirin | RR 1.01 (0.84-1.38)      | Risk Without Treatment<br>300 cases per 1,000 <sup>a</sup><br>Risk Difference With LMWH and Aspirin (95% CI)<br>3 more per 1,000 (from 48 fewer to 114 more) |
| 294 (1 RCT), 9 mo                 | No serious risk of bias | No serious inconsistency | No serious indirectness | Serious imprecision<br>CI includes benefit and harm           | Undetected       | Major bleeding (critical outcome)<br>Moderate due to imprecision | Without Treatment     | With LMWH and Aspirin | RR 1.00 (0.42-2.33)      | 15 bleeding events per 1,000 <sup>a</sup><br>0 more bleeding events per 1,000 (from 9 fewer to 20 more)                                                      |

**Bibliography:** Greer IA, Nelson-Piercy C. Low molecular weight heparins for thromboprophylaxis and treatment of venous thromboembolism in pregnancy: a systematic review of safety and efficacy. *Blood*. 2005;106:401-407. Data from an unpublished meta-analysis<sup>d</sup> of two RCTs by Kaandorp SP, Mariette Goddijn M, van der Post JAM, et al. Aspirin combined with low-molecular-weight heparin and aspirin alone in women with recurrent miscarriage. A randomized placebo-controlled trial: the ALIFE study. *N Engl J Med*. 2010;29:1586-1596 and Clark P, Walker ID, Langhorne P, et al. SPIN (Scottish Pregnancy Intervention) study: a multicenter, randomized controlled trial of low-molecular-weight heparin and low-dose aspirin in women with recurrent miscarriage. *Blood*. 2010;115:4162-4167. See Table S3, S4, and S9 legends for expansion of abbreviations.

<sup>a</sup>Control group risk for miscarriage comes from study event rates in the two available randomized trials by Kaandorp and Clark.  
<sup>b</sup>Bleeding outcomes variably reported in the two trials. We use data from Clark et al on serious adverse events and antepartum hemorrhage to generate both relative risks and baseline risks for anticipated absolute effects. Kaandorp et al reported nose bleed, GI problem, hematuria, and bleeding gums. There were no major bleeding events (S. Middeldorp, MD, personal communication, October 2010).  
<sup>c</sup>Control group risk estimate for major bleeding events antepartum comes from systematic review by Greer et al.  
<sup>d</sup>Meta-analysis performed in RevMan version 5 with fixed-effects model for heterogeneity.

**Table S26—[Section 11.2.1] Evidence Profile: Should Aspirin Rather Than No Treatment Be Used for Prevention of Recurrent Pregnancy Loss in Women Without Thrombophilia?**

| Participants (Studies), Follow-up | Quality Assessment      |                          |                         |                                                               | Summary of Findings |                              |                                                                        |                  |                                               |                          |                                                                    |
|-----------------------------------|-------------------------|--------------------------|-------------------------|---------------------------------------------------------------|---------------------|------------------------------|------------------------------------------------------------------------|------------------|-----------------------------------------------|--------------------------|--------------------------------------------------------------------|
|                                   | Risk of Bias            | Inconsistency            | Indirectness            | Imprecision                                                   | Publication Bias    | Overall Quality of Evidence  | Study Event Rates (%)                                                  |                  | Anticipated Absolute Effects During Pregnancy |                          |                                                                    |
|                                   |                         |                          |                         |                                                               |                     |                              | Without Treatment                                                      | With Aspirin     |                                               | Relative Effect (95% CI) | Risk Without Treatment                                             |
| 202 (1 RCTs), 9 mo                | No serious risk of bias | No serious inconsistency | No serious indirectness | Serious imprecision<br>CI includes important benefit and harm | Undetected          | Moderate due to imprecision  | Miscarriage (critical outcome)                                         | 34/103 (33)      | 38/99 (38)                                    | RR 1.16 (0.80-1.69)      | 300 cases per 1,000 <sup>a</sup> (from 60 fewer to 207 more)       |
| 95,000 (6 RCTs), 3.8-10 y         | No serious risk of bias | No serious inconsistency | Serious indirectness    | No serious imprecision                                        | Undetected          | Moderate due to indirectness | Major bleeding (critical outcome) antepartum hemorrhage <sup>b,c</sup> | 219/47,500 (0.5) | 335/47,500 (0.7)                              | RR 1.54 (1.30-1.82)      | 15 bleeding events per 1,000 <sup>d</sup> (from 5 more to 12 more) |

**Bibliography:** Kaandorp SP, Maniëtte Goddijn M, van der Post JAM et al. Aspirin combined with low-molecular-weight heparin and aspirin alone in women with recurrent miscarriage. A randomized placebo-controlled trial: the ALIFE study. *New Engl J Med.* 2010;29:362:1586-1596. Clark P, Walker ID, Langhorne P, et al. SPIN (Scottish Pregnancy Intervention) study: a multicenter, randomized controlled trial of low-molecular-weight heparin and low-dose aspirin in women with recurrent miscarriage. *Blood.* 2010;115:4162-4167. Greer IA, Nelson-Piercy C. Low molecular weight heparins for thromboprophylaxis and treatment of venous thromboembolism in pregnancy: a systematic review of safety and efficacy. *Blood.* 2005;106:401-407. See Table S3 and S9 legends for expansion of abbreviations.

<sup>a</sup>Baseline risk for miscarriage comes from study event rates in the two available randomized trials by Kaandorp et al and Clark et al.

<sup>b</sup>Major antenatal nonfatal hemorrhage.

<sup>c</sup>Rated down for indirectness due to population (primary prevention cardiovascular disease). There were no major bleeding events in the ALIFE Study (personal communication with authors).

<sup>d</sup>Control group risk estimate for major bleeding events antepartum comes from systematic review by Greer et al.

<sup>e</sup>Only study identified that compared aspirin to placebo in this population.

**Table S27—[Section 12.1.1-12.1.3] Systematic Reviews Examining Maternal and Fetal Safety of Anticoagulant Regimens in Pregnant Women With Mechanical Heart Valves (Methodologic Quality)**

| Study/Year                            | Intervention                                                                                                                         | Inclusive Literature Search | Duplicate Study Selection and Data Extraction | List of Studies                  |          | Characteristics of Included Studies Provided | Assessment of Quality of Included Studies | Appropriate Methods Used to Combine Study Findings | Assessment of Likelihood of Publication Bias |
|---------------------------------------|--------------------------------------------------------------------------------------------------------------------------------------|-----------------------------|-----------------------------------------------|----------------------------------|----------|----------------------------------------------|-------------------------------------------|----------------------------------------------------|----------------------------------------------|
|                                       |                                                                                                                                      |                             |                                               | (Included and Excluded) Provided | Provided |                                              |                                           |                                                    |                                              |
| Chan et al <sup>1</sup> /2000         | Studies between 1966 and 1997 examining the use of VKAs and UFH or no anticoagulation in pregnant women with mechanical heart valves | Yes                         | No                                            | No                               | No       | No                                           | No                                        | Yes                                                | No                                           |
| Hassouma and Allam <sup>2</sup> /2010 | Studies between 2000 and 2009 examining the use of VKAs and UFH or no anticoagulation in pregnant women with mechanical heart valves | No                          | Bi                                            | No                               | No       | No                                           | No                                        | Yes                                                | No                                           |
| James et al <sup>67</sup> /2006       | Studies between 1966 and 2006 involving pregnant women with mechanical heart valves receiving LMWH                                   | No                          | No                                            | No                               | No       | Yes                                          | No                                        | N/A                                                | No                                           |
| Oran et al <sup>68</sup> /2004        | Studies between 1989 and 2004 involving pregnant women with mechanical heart valves who received heparin                             | Yes                         | No                                            | No                               | No       | Yes                                          | No                                        | N/A                                                | No                                           |

See Table S1 and S4 legends for expansion of abbreviations.

**Table S28—[Section 12.1.1-12.1.3] Antithrombotic Therapy in Pregnant Women With Mechanical Heart Valves—Maternal Outcomes (Clinical Description and Results)**

| Country, Study/Year                                      | Number of Patients and Pregnancies | Population                                                                                                                                                        | Treatment Regimens                                                                                                                                                                                                                                                                                  | Maternal Deaths, n/N (%)                                                             | Maternal Intracranial Bleeding events, n/N (%)  | Maternal Extracranial Bleeding events, n/N (%)                                                                                                         | Maternal Systemic Thromboembolism, n/N (%)                                                                         |
|----------------------------------------------------------|------------------------------------|-------------------------------------------------------------------------------------------------------------------------------------------------------------------|-----------------------------------------------------------------------------------------------------------------------------------------------------------------------------------------------------------------------------------------------------------------------------------------------------|--------------------------------------------------------------------------------------|-------------------------------------------------|--------------------------------------------------------------------------------------------------------------------------------------------------------|--------------------------------------------------------------------------------------------------------------------|
| Cohort studies with comparator groups                    |                                    |                                                                                                                                                                   |                                                                                                                                                                                                                                                                                                     |                                                                                      |                                                 |                                                                                                                                                        |                                                                                                                    |
| Iran, retrospective, Khamooshi et al <sup>69</sup> /2007 | 110 women<br>196 pregnancies       | Pregnant women with mechanical heart valves<br>Valve type<br>Tilting: 98<br>Bileaflet: 98<br>Valve position<br>Aortic: 26<br>Mitral: 128<br>Aortic and mitral: 42 | Regimen 1 warfarin throughout pregnancy; INR checked monthly and kept 2.5-3.5<br>Regimen 2 SC UFH for the first trimester, warfarin until week 36, then UFH for remainder of pregnancy; aPTT kept 2 times control                                                                                   | Regimen 1, 5/142 (3.5)<br>Regimen 2, 2/54 (3.7)<br>No fatal maternal bleeding events | Regimen 1, 0/142 (0.0)<br>Regimen 2, 0/54 (0.0) | Regimen 1, 0/142 (0.0)<br>Regimen 2, 2/54 (3.7) (2 vaginal bleeding events treated conservatively)<br>No major GI or major obstetrical bleeding events | Regimen 1, 6/142 (3.1) (3 valve thrombosis, 3 embolism)<br>Regimen 2, 9/54 (16.7) (7 valve thrombosis, 2 embolism) |
| Korea, retrospective, Lee et al <sup>70</sup> /2007      | 25 women<br>31 pregnancies         | Pregnant women with mechanical heart valves<br>Valve position<br>Aortic: 4<br>Mitral: 21<br>Double valve replacement: 5                                           | Regimen 1 coumarin and aspirin throughout pregnancy with target INR 2.5-3.5, then nadroparin 7,500 units SC q12h for 2 wk before due date<br>Regimen 2 nadroparin 7,500 units SC q12h until week 12, then coumarins until week 38 when nadroparin resumed.<br>Aspirin 100 mg/d throughout pregnancy | Regimen 1, 0/8 (0)<br>Regimen 2, 0/23 (0)                                            | Regimen 1, 0/8 (0.0)<br>Regimen 2, 0/23 (0.0)   | Regimen 1, 0/23 (0.0)<br>Regimen 2, 0/23 (0.0)                                                                                                         | Regimen 1, 2/8 (25.0) (1 valve thrombosis, 1 TIA)<br>Regimen 2, 3/23 (13.0) (2 valve thrombosis, 1 TIA)            |

(Continued)

**Table S28—Continued**

| Country, Study/Year                                                   | Number of Patients and Pregnancies | Population                                                                                                                                                                            | Treatment Regimens                                                                                                                                                                                                                                                                                                                                                                                                              | Maternal Deaths, n/N (%) | Maternal Intracranial Bleeding events, n/N (%) | Maternal Extracranial Bleeding events, n/N (%)                                                                                                                                                                                                                                                                                                                                                                                                                                                                            | Maternal Systemic Thromboembolism, n/N (%)                                                                    |
|-----------------------------------------------------------------------|------------------------------------|---------------------------------------------------------------------------------------------------------------------------------------------------------------------------------------|---------------------------------------------------------------------------------------------------------------------------------------------------------------------------------------------------------------------------------------------------------------------------------------------------------------------------------------------------------------------------------------------------------------------------------|--------------------------|------------------------------------------------|---------------------------------------------------------------------------------------------------------------------------------------------------------------------------------------------------------------------------------------------------------------------------------------------------------------------------------------------------------------------------------------------------------------------------------------------------------------------------------------------------------------------------|---------------------------------------------------------------------------------------------------------------|
| New Zealand, retrospective audit, McLintock et al <sup>17</sup> /2009 | 31 women<br>47 pregnancies         | Pregnant women with mechanical heart valves<br>Valve type<br>Starr-Edwards: 12<br>Tilting disc or bileaflet: 19<br>Valve position<br>Mitral: 14<br>Aortic: 4<br>Mitral and aortic: 13 | Regimen 1 predominantly warfarin and aspirin (100-150 mg) throughout with enoxaparin (1 mg/kg SC q12h) and aspirin substituted between weeks 6 and 12 and at 34 and 36 wk gestation<br>Regimen 2 enoxaparin (1 mg/kg SC q12h) and aspirin (100-150 mg) predominantly<br>In both regimens, enoxaparin monitored by anti-Xa levels every 3-7 d; dose adjusted to attain a target predose level: 0.4-0.7<br>International Units/mL | Regimen 1, 0/13 (0.0)    | Regimen 1, 0/13 (0.0)                          | Unable to separate by regimen<br>Maternal major GI bleeding events: 0/47 (1 minor hematemesis with enoxaparin)<br>Maternal major obstetrical bleeding events: 19/47 (2 abruptions and 1 antepartum hemorrhage with enoxaparin; 1 additional abruption during IV UFH around delivery; 1 additional minor antepartum hemorrhage with enoxaparin; 6 primary postpartum hemorrhages and 9 secondary postpartum hemorrhages)<br>Major bleeding from other site: 1/47 (rectus sheath and epistaxis with IV UFH around delivery) | Regimen 1, 0/13 (0)                                                                                           |
|                                                                       |                                    |                                                                                                                                                                                       |                                                                                                                                                                                                                                                                                                                                                                                                                                 | Regimen 2, 0/34 (0.0)    | Regimen 2, 0/34 (0.0)                          |                                                                                                                                                                                                                                                                                                                                                                                                                                                                                                                           | Regimen 2, 5/34 (14.7)<br>(1 valve thrombosis, 4 TIA, 3/5 associated with noncompliance, 2 events postpartum) |

(Continued)

**Table S28—Continued**

| Country, Study/Year                                         | Number of Patients and Pregnancies | Population                                                                                                      | Treatment Regimens                                                                                                                                                                                          | Deaths, n/N (%)                                                                                                                                                            | Maternal Intracranial Bleeding events, n/N (%) | Maternal Extracranial Bleeding events, n/N (%)                                                                                                              | Maternal Systemic Thromboembolism, n/N (%)                                                                                                                                 |
|-------------------------------------------------------------|------------------------------------|-----------------------------------------------------------------------------------------------------------------|-------------------------------------------------------------------------------------------------------------------------------------------------------------------------------------------------------------|----------------------------------------------------------------------------------------------------------------------------------------------------------------------------|------------------------------------------------|-------------------------------------------------------------------------------------------------------------------------------------------------------------|----------------------------------------------------------------------------------------------------------------------------------------------------------------------------|
| Single-group cohort studies                                 |                                    |                                                                                                                 |                                                                                                                                                                                                             |                                                                                                                                                                            |                                                |                                                                                                                                                             |                                                                                                                                                                            |
| Norway, retrospective, Abildgaard et al <sup>73</sup> /2009 | 11 women<br>12 pregnancies         | Pregnant women with mechanical heart valves<br>Valve position<br>Mitral: 4<br>Aortic: 6<br>Aortic and mitral: 2 | Therapeutic doses of LMWH q12h throughout pregnancy. Aspirin 75 mg/d recommended but discontinued 1 wk before expected delivery date<br><br>Doses adjusted to attain peak anti-Xa level of 0.7-1.2 units/mL | 0/12 (0.0)<br>1 subject who died suddenly at 11 wk with no autopsy evidence of bleeding or thrombosis excluded from analysis<br>No maternal fatal bleeding events reported | 0/12 (0.0)                                     | 4/12 (33.3)<br>No maternal major GI bleeding events<br>Maternal major obstetrical bleeding events: 4 (all postpartum or postcesarean section)               | 2/12 (16.7) (both associated with subtherapeutic dosing of LMWH)<br>Maternal ischemic stroke: 1<br>Maternal nonstroke systemic embolism: 0<br>Maternal valve thrombosis: 1 |
| Japan, retrospective, Kawamata et al <sup>73</sup> /2007    | 12 women<br>16 pregnancies         | Pregnant women with mechanical heart valves<br>Valve position<br>Mitral: 7<br>Aortic: 2<br>Tricuspid: 7         | Substitution of warfarin with UFH starting between 6-13 wk and until term<br><br>Doses adjusted to maintain aPTT levels 2-3 times control (between 20,000 and 30,000 International Units/d)                 | 1/16 (6.3) (death of mother and fetus during replacement of thrombosed valve)<br>No fatal maternal bleeding events                                                         | 2/16 (12.5)                                    | 7/16 (43.8)<br>No maternal major GI bleeding events<br>Maternal major obstetrical bleeding events: 7 (4 perinatal bleeding, 3 subchorionic bleeding events) | 3/16 (13.8)<br>Maternal ischemic stroke: 0<br>No maternal nonstroke systemic embolism: 0<br>Maternal valve thrombosis: 2                                                   |

(Continued)

**Table S28—Continued**

| Country, Study/Year                                   | Number of Patients and Pregnancies | Population                                                                                                                                                  | Treatment Regimens                                                                                                                                                      | Maternal Deaths, n/N (%)                                                     | Maternal Intracranial Bleeding events, n/N (%) | Maternal Extracranial Bleeding events, n/N (%)                                                                                                                                                                                                                                                                                                              | Maternal Systemic Thromboembolism, n/N (%)                                                                                                                            |
|-------------------------------------------------------|------------------------------------|-------------------------------------------------------------------------------------------------------------------------------------------------------------|-------------------------------------------------------------------------------------------------------------------------------------------------------------------------|------------------------------------------------------------------------------|------------------------------------------------|-------------------------------------------------------------------------------------------------------------------------------------------------------------------------------------------------------------------------------------------------------------------------------------------------------------------------------------------------------------|-----------------------------------------------------------------------------------------------------------------------------------------------------------------------|
| England, prospective, Quinn et al <sup>75</sup> /2009 | 11 women<br>12 pregnancies         | Pregnant women with mechanical heart valves<br>Valve position<br>Mitral: 4<br>Aortic: 2<br>Aortic and mitral: 3<br>Systemic right atrioventricular valve: 2 | Dalteparin 100 International Units/kg q12h (8) or enoxaparin 1 mg/kg q12h (4) + aspirin 81 mg/d<br>LMWH doses adjusted to attain an anti-Xa level 1.0-1.2 units/mL      | 0/12 (0.0)<br>No maternal fetal bleeding events reported                     | Not reported                                   | 6/12 (50.0) (3 minor; epistaxis, placental hematoma, secondary postpartum hemorrhage; 3 major as below)<br>No maternal major GI bleeding events reported<br>Maternal major obstetrical bleeding events: 3 (anteartum hemorrhage with placenta previa, persistent cervical hematoma and vaginal bleeding leading to cesarean section, postpartum hemorrhage) | 1/12 (8.3) (associated with subtherapeutic anti-Xa levels)<br>No maternal ischemic stroke reported.<br>No maternal embolism reported.<br>Maternal valve thrombosis: 1 |
| Canada, prospective, Yinon et al <sup>76</sup> /2009  | 17 women<br>23 pregnancies         | Pregnant women with mechanical heart valves<br>Valve position<br>Mitral: 14<br>Aortic: 8<br>Aortic and mitral: 1                                            | LMWH SC q12h.<br>Low-dose aspirin (81 mg/d) administered to all patients<br>LMWH dose adjusted to maintain 4 h postinjection anti-Xa level 1-1.2 International Units/mL | 1/23 (4.3) (fatal TIA/valve thrombosis)<br>No fatal maternal bleeding events | 0/23 (0.0)                                     | 3/23 (13.0) (2 minor postpartum and 1 major bleeding events as below)<br>No major maternal GI bleeding events<br>Major maternal obstetrical bleeding events: 1/23 (large uterine hematoma postcesarean section requiring transfusion)                                                                                                                       | 1/23 (4.3)<br>Maternal ischemic stroke: 1<br>Maternal nonstroke systemic embolism: 0<br>Maternal valve thrombosis: 1                                                  |

(Continued)

**Table S28—Continued**

| Country, Study/Year | Number of Patients and Pregnancies | Population                                                                                                                                                                                                                                                                                                                                                                                      | Treatment Regimens                                                                                                                                                                                                                                                                                                                                             | Maternal Deaths, n/N (%)                                                                                                                                                                                                                                                                  | Maternal Intracranial Bleeding events, n/N (%) | Maternal Extracranial Bleeding events, n/N (%)                                                                                        | Maternal Systemic Thromboembolism, n/N (%)                                                                                                                                                                                                                                                                                                             |
|---------------------|------------------------------------|-------------------------------------------------------------------------------------------------------------------------------------------------------------------------------------------------------------------------------------------------------------------------------------------------------------------------------------------------------------------------------------------------|----------------------------------------------------------------------------------------------------------------------------------------------------------------------------------------------------------------------------------------------------------------------------------------------------------------------------------------------------------------|-------------------------------------------------------------------------------------------------------------------------------------------------------------------------------------------------------------------------------------------------------------------------------------------|------------------------------------------------|---------------------------------------------------------------------------------------------------------------------------------------|--------------------------------------------------------------------------------------------------------------------------------------------------------------------------------------------------------------------------------------------------------------------------------------------------------------------------------------------------------|
| Canada, Chan/2000   | 976 women<br>1,234 pregnancies     | Studies between 1966 and 1997 involving pregnant women with mechanical heart valves<br>Valve type<br>Cage and ball: 433<br>Single-tilting disc: 356<br>Bileaflet: 62<br>Other: 20<br>Heterograft: 1<br>Unknown: 104<br>Position<br>Mitral: 647<br>Aortic: 202<br>Tricuspid: 1<br>> 1 valve: 126<br>Valve position<br>Mitral: 647<br>Aortic: 202<br>Tricuspid: 1<br>> 1 valve: 126<br>Total: 976 | Regimen 1 oral anticoagulants throughout pregnancy<br>Regimen 2 substitution of UFH in the first trimester either at or before 6 wk, after 6 wk, or at unknown time in the first trimester<br>Regimen 3 UFH throughout pregnancy-adjusted dose or low dose ( $\leq 15,000$ units/d)<br>Regimen 4 no anticoagulants, including use of antiplatelet agents alone | Overall: 25/854 (2.9%)<br><br>Regimen 1, 10/561 (1.8)<br>Regimen 2, 7/167, (4.2)<br><br>Regimen 3, 3/20 (15.0)<br>Adjusted-dose UFH: 1/15 (6.7)<br>Low-dose UFH: 2/5 (40)<br>Regimen 4, 5/106, (4.7) Nothing: 2/3, (5.4)<br>Antiplatelet: 3/69 (4.3)<br>Fatal maternal bleeding events: 2 | Overall: 0/1234 (0.0)                          | Overall major bleeding events: 31/1234 (2.5) (25 at delivery, 6 outside delivery); unable to separate by regimen or specific location | Regimen 1, 31/788 (3.9)<br>Regimen 2, 21/229 (9.2)<br><br>Regimen 3, 7/21 (33.3)<br>Adjusted-dose UFH: 4/16 (25.0)<br>Low-dose UFH: 3/5 (60.0)<br><br>Regimen 4, 26/107 (24.3) Nothing: 6/38 (15.8)<br>Antiplatelet: 20/69 (29)<br>Maternal ischemic stroke: 0<br>Maternal nonstroke systemic embolism: 0<br>Maternal valve thrombosis: 17 [all fatal] |
| Systematic reviews  |                                    |                                                                                                                                                                                                                                                                                                                                                                                                 |                                                                                                                                                                                                                                                                                                                                                                |                                                                                                                                                                                                                                                                                           |                                                |                                                                                                                                       |                                                                                                                                                                                                                                                                                                                                                        |

(Continued)



**Table S28—Continued**

| Country, Study/Year                            | Number of Pregnancies | Population                                                                                                                                                                                                                                                                                | Treatment Regimens                                                                                                                                                                                                                                                                                                                                                                                                                              | Maternal Deaths, n/N (%)                                                                                          | Maternal Intracranial Bleeding events, n/N (%)                                  | Maternal Extracranial Bleeding events, n/N (%)                                                                                                                                                                                                                                                                                                         | Maternal Systemic Thromboembolism, n/N (%)                                                                                                                |
|------------------------------------------------|-----------------------|-------------------------------------------------------------------------------------------------------------------------------------------------------------------------------------------------------------------------------------------------------------------------------------------|-------------------------------------------------------------------------------------------------------------------------------------------------------------------------------------------------------------------------------------------------------------------------------------------------------------------------------------------------------------------------------------------------------------------------------------------------|-------------------------------------------------------------------------------------------------------------------|---------------------------------------------------------------------------------|--------------------------------------------------------------------------------------------------------------------------------------------------------------------------------------------------------------------------------------------------------------------------------------------------------------------------------------------------------|-----------------------------------------------------------------------------------------------------------------------------------------------------------|
| United States, James et al <sup>67</sup> /2006 | 76 pregnancies        | Studies between 1966 and 2006 involving pregnant women with mechanical heart valves receiving LMWH<br>Valve type<br>Cage and ball: 4<br>Single-tilting disc: 2<br>Bileaflet: 8<br>Sorin: 1<br>Unknown: 61<br>Valve position<br>Mitral: 24<br>Aortic: 12<br>Bjork-Shiley: 2<br>Unknown: 40 | Conversion to LMWH prior to pregnancy or by the end of first trimester<br>LMWH<br>Enoxaparin: 32<br>Nadroparin: 20<br>Dalteparin: 13<br>Tinzaparin: 2<br>Reviparin: 1<br>Unknown: 8<br>Addition of low-dose aspirin: 13<br>Varying regimens ranging from a fixed subtherapeutic dose to weight-adjusted therapeutic doses<br>Monitoring of anti-factor Xa levels: 43. The minimum value for the target ranges was 0.5, and the maximum was 1.2. | 3/76 (3.9)<br>Fatal maternal bleeding events: 1 (1 intracranial bleed during conversion to warfarin postdelivery) | 1/76 (1.3)<br>(1 intracranial bleed during conversion to warfarin postdelivery) | 6/76 (7.9) (4 minor bleeding events [2 hematomas, 1 subchorionic hematoma, 1 delayed broad ligament hematoma] and 2 major bleeding events as below)<br>No major maternal GI bleeding events<br>Major maternal obstetrical bleeding events:<br>2 (1 peripartum hemorrhage requiring transfusion, 1 delayed postpartum hemorrhage requiring transfusion) | 17/76 (22.4)<br>Maternal ischemic stroke: 2<br>Maternal nonstroke systemic embolism: 2 (myocardial infarction)<br>Maternal valve thrombosis: 13 (2 fatal) |

(Continued)

**Table S28—Continued**

| Country, Study/Year                           | Number of Pregnancies      | Population                                                                                            | Treatment Regimens                                                                                                                                                                                                                                                                                                                                                                                                                                                                                                                                                                          | Maternal Deaths, n/N (%)                                                                                        | Maternal Intracranial Bleeding events, n/N (%)                                | Maternal Extracranial Bleeding events, n/N (%)                                                                                                                                                                              | Maternal Systemic Thromboembolism, n/N (%)                                                                                                                                                                                                                                   |
|-----------------------------------------------|----------------------------|-------------------------------------------------------------------------------------------------------|---------------------------------------------------------------------------------------------------------------------------------------------------------------------------------------------------------------------------------------------------------------------------------------------------------------------------------------------------------------------------------------------------------------------------------------------------------------------------------------------------------------------------------------------------------------------------------------------|-----------------------------------------------------------------------------------------------------------------|-------------------------------------------------------------------------------|-----------------------------------------------------------------------------------------------------------------------------------------------------------------------------------------------------------------------------|------------------------------------------------------------------------------------------------------------------------------------------------------------------------------------------------------------------------------------------------------------------------------|
| United States, Oran et al <sup>69</sup> /2004 | 75 women<br>81 pregnancies | Studies between 1989 and 2004 involving pregnant women with mechanical heart valves who received LMWH | Cases were included if LMWH was received during pregnancy irrespective of this type, dose and duration and administration of different anticoagulant regimens other than LMWH during the same pregnancy. Conversion to LMWH occurred 1 mo before conception in 2 women; in the remainder, conversion to LMWH occurred during pregnancy LMWH use during second half of first trimester and at term: 21 LMWH throughout pregnancy: 60. LMWH Enoxaparin: 35 Nadroparin: 21 Dalteparin: 11 Tinzaparin: 3 Reviparin: 1 Unknown: 10 Dose adjusted to therapeutic anti-Xa level: 51 Fixed dose: 30 | 1/81 (1.2)<br>Fatal maternal bleeding events: 1 (intracranial bleed 3 mo postpartum with no monitoring of INRs) | 1/81 (1.2)<br>(intracranial bleed 3 mo postpartum with no monitoring of INRs) | 3/81 (3.7)<br>Anti-Xa-adjusted LMWH: 2 (hematomas at cesarean incision)<br>Fixed-dose LMWH: 1 (peripartum hemorrhage)<br>No major maternal GI bleeding events<br>Major maternal obstetrical bleeding events: 1 (peripartum) | 10/81 (12.3)<br>Anti-Xa-adjusted LMWH: 1 (valve thrombosis)<br>Fixed-dose LMWH: 9 (6 valve thrombosis, 2 cerebrovascular accidents, 1 embolism)<br>Maternal ischemic stroke: 2<br>Maternal nonstroke embolism (type not reported): 1<br>Maternal valve thrombosis: 7 (8.64%) |

(Continued)

**Table S28—Continued**

| Country, Study/Year                          | Number of Patients and Pregnancies | Population                                                                                                                                                  | Treatment Regimens                                                                                                                                                                                                                                  | Maternal Deaths, n/N (%)                                                                                                    | Maternal Intracranial Bleeding events, n/N (%) | Maternal Extracranial Bleeding events, n/N (%)                                                                                                                                                                                                                | Maternal Systemic Thromboembolism, n/N (%)                                                                                                                                                                                            |
|----------------------------------------------|------------------------------------|-------------------------------------------------------------------------------------------------------------------------------------------------------------|-----------------------------------------------------------------------------------------------------------------------------------------------------------------------------------------------------------------------------------------------------|-----------------------------------------------------------------------------------------------------------------------------|------------------------------------------------|---------------------------------------------------------------------------------------------------------------------------------------------------------------------------------------------------------------------------------------------------------------|---------------------------------------------------------------------------------------------------------------------------------------------------------------------------------------------------------------------------------------|
| Egypt, Hassouna and Allam <sup>2</sup> /2009 | 892 women<br>1,231 pregnancies     | Studies published between January 2000 and September 2009 involving pregnant women with mechanical heart valves who received defined anticoagulant regimens | Regimen 1 VKAs throughout pregnancy with and without UFH or LMWH substitution near term<br>Regimen 2 UFH or LMWH substitution during the first trimester and near term<br>Regimen 3 UFH or LMWH throughout pregnancy<br>Regimen 4 no anticoagulants | Overall: 16/974, (1.6)<br>Regimen 1, 7/605 (1.1)<br>Regimen 2, 4/236 (1.7)<br>Regimen 3, 5/107 (4.7)<br>Regimen 4, 0/26 (0) | Not reported                                   | Overall: 65/1343 (4.8)<br>Regimen 1, 35/833 (4.2)<br>Regimen 2, 11/322 (3.4)<br>Regimen 3, 17/157 (10.8)<br>Regimen 4, 2/31 (6.4)<br>Major maternal GI bleeding events: not reported<br>Maternal major obstetrical bleeding events: 55 (occurred at delivery) | Overall: 77/1343 (5.7)<br>Regimen 1, 24/833 (2.9%)<br>Regimen 2, 23/322 (7.2%)<br>Regimen 3, 21/157 (13.4%)<br>Regimen 4, 9/31 (29%)<br>Maternal ischemic stroke and nonstroke systemic embolism: 26<br>Maternal valve thrombosis: 51 |
|                                              |                                    | Valve type<br>Cage and ball: 134<br>Tilting disc: 382<br>Bileaflet: 341<br>Undefined: 256                                                                   |                                                                                                                                                                                                                                                     | Fatal maternal events: 2<br>Fatal maternal thrombosis: 8                                                                    |                                                |                                                                                                                                                                                                                                                               |                                                                                                                                                                                                                                       |
|                                              |                                    | Valve position<br>Mitral: 671<br>Aortic: 141<br>Mitral and aortic: 147 + 147<br>Tricuspid: 7                                                                |                                                                                                                                                                                                                                                     |                                                                                                                             |                                                |                                                                                                                                                                                                                                                               |                                                                                                                                                                                                                                       |

TIA = transient ischemic attack. See Tables S1, S4, and S17 for expansion of other abbreviations.

**Table S29—[Section 12.1.1-12.1.3] Antithrombotic Therapy in Pregnant Women With Mechanical Heart Valves—Fetal and Neonatal Outcomes (Clinical Description and Results)**

| Country, Study/Year                                      | Number of Patients and Pregnancies | Population                                                                                                                                                        | Treatment Regimens                                                                                                                                                                                                | Congenital Malformations, n/N (%)                                                                     | Fetal and/or Neonatal Hemorrhage, n/N (%) | Total Pregnancy Loss, n/N (%)                     | Early Pregnancy Loss, n/N (%)                      | Late Pregnancy Loss, n/N (%)                    | Neonatal Death                                           |
|----------------------------------------------------------|------------------------------------|-------------------------------------------------------------------------------------------------------------------------------------------------------------------|-------------------------------------------------------------------------------------------------------------------------------------------------------------------------------------------------------------------|-------------------------------------------------------------------------------------------------------|-------------------------------------------|---------------------------------------------------|----------------------------------------------------|-------------------------------------------------|----------------------------------------------------------|
| Iran, retrospective, Khamooshi et al <sup>73</sup> /2007 | 110 women<br>196 pregnancies       | Pregnant women with mechanical heart valves<br>Valve type<br>Tilting: 98<br>Bileaflet: 98<br>Valve position<br>Aortic: 26<br>Mitral: 128<br>Aortic and mitral: 42 | Regimen 1 warfarin throughout pregnancy; INR checked monthly and kept 2.5-3.5<br>Regimen 2 SC UFH for the first trimester; warfarin until week 36, then UFH for remainder of pregnancy; aPTT kept 2 times control | Regimen 1, 7/142 (4.9)<br>Regimen 2, 1/54 (1.9)                                                       | Not reported                              | Regimen 1, 71/142 (50)<br>Regimen 2, 10/54 (18.5) | Regimen 1, 66/142 (46.5)<br>Regimen 2, 8/54 (14.8) | Regimen 1, 5/142 (3.5)<br>Regimen 2, 2/54 (3.7) | Unable to separate neonatal deaths from premature births |
| Cohort studies with comparator groups                    |                                    |                                                                                                                                                                   |                                                                                                                                                                                                                   |                                                                                                       |                                           |                                                   |                                                    |                                                 |                                                          |
|                                                          |                                    |                                                                                                                                                                   |                                                                                                                                                                                                                   | Malformations included hydrocephalus (2), stabisimus (3), telebrachydactyly (1), nasal hypoplasia (1) |                                           |                                                   |                                                    |                                                 |                                                          |

(Continued)

**Table S29—Continued**

| Country, Study/Year                                 | Number of Patients and Pregnancies | Population                                                                                                              | Treatment Regimens                                                                                                                                                                                                                                                                                | Congenital Malformations, n/N (%)     | Fetal and/or Neonatal Hemorrhage, n/N (%) | Total Pregnancy Loss, n/N (%)                                                                                                                              | Early Pregnancy Loss, n/N (%) | Late Pregnancy Loss, n/N (%) | Neonatal Death |
|-----------------------------------------------------|------------------------------------|-------------------------------------------------------------------------------------------------------------------------|---------------------------------------------------------------------------------------------------------------------------------------------------------------------------------------------------------------------------------------------------------------------------------------------------|---------------------------------------|-------------------------------------------|------------------------------------------------------------------------------------------------------------------------------------------------------------|-------------------------------|------------------------------|----------------|
| Korea, retrospective, Lee et al <sup>73</sup> /2007 | 25 women<br>31 pregnancies         | Pregnant women with mechanical heart valves<br>Valve position<br>Aortic: 4<br>Mitral: 21<br>Double valve replacement: 5 | Regimen 1 coumarin and aspirin throughout pregnancy with target INR 2.5-3.5, then nadroparin 7,500 units SC q12h for 2 wk before due date<br>Regimen 2 nadroparin 7,500 units SC q12 until week 12, then coumarins until week 38 when nadroparin resumed<br>Aspirin 100 mg/d throughout pregnancy | Regimen 1, 1/23 (3.2) (hydrocephalus) | Not reported                              | Regimen 1, 4/8 (50) (1 loss was associated with maternal valve thrombosis)<br>Regimen 2, 2/23 (8.7) (1 loss was associated with maternal valve thrombosis) | Not specified                 | Not specified                | Not specified  |

(Continued)

**Table S29—Continued**

| Country, Study/Year                                            | Number of Patients and Pregnancies | Population                                                                                                                                                                            | Treatment Regimens                                                                                                                                                                                                                                                                                                                                                                                                       | Congenital Malformations, n/N (%)                                               | Fetal and/or Neonatal Hemorrhage, n/N (%)                                       | Total Pregnancy Loss, n/N (%)  | Early Pregnancy Loss, n/N (%) | Late Pregnancy Loss, n/N (%)                                                    | Neonatal Death                                                                  |
|----------------------------------------------------------------|------------------------------------|---------------------------------------------------------------------------------------------------------------------------------------------------------------------------------------|--------------------------------------------------------------------------------------------------------------------------------------------------------------------------------------------------------------------------------------------------------------------------------------------------------------------------------------------------------------------------------------------------------------------------|---------------------------------------------------------------------------------|---------------------------------------------------------------------------------|--------------------------------|-------------------------------|---------------------------------------------------------------------------------|---------------------------------------------------------------------------------|
| New Zealand, retrospective, McLintock et al <sup>7</sup> /2009 | 31 women<br>47 pregnancies         | Pregnant women with mechanical heart valves<br>Valve type<br>Starr-Edwards; 12<br>Tilting disc or bileaflet; 19<br>Valve position<br>Mitral: 14<br>Aortic: 4<br>Mitral and aortic: 13 | Regimen 1<br>predominantly warfarin and aspirin (100-150 mg) throughout with enoxaparin (1 mg/kg SC q12h) and aspirin substituted between weeks 6 and 12 and at 34-36 wk gestation<br>Regimen 2 enoxaparin (1 mg/kg SC q12h) and aspirin (100-150 mg) predominantly in both regimens, enoxaparin monitored by anti-Xa levels every 3-7 d; dose adjusted to attain a target predose level: 0.4-0.7 International Units/mL | Regimen 1, 3/13 (23.1) (warfarin embryopathy, hydrocephalus, cardiac anomalies) | Regimen 1, 2/13 (15.3) (fetal intracerebral hemorrhage resulting in stillbirth) | Regimens 1 and 2, 11/47 (23.4) | Regimens 1 and 2, 8/47 (17.0) | Regimen 1, 2/13 (15.3) (fetal intracerebral hemorrhage resulting in stillbirth) | Regimen 1, 2/13 (15.3) (warfarin embryopathy, complex congenital heart disease) |
|                                                                |                                    |                                                                                                                                                                                       |                                                                                                                                                                                                                                                                                                                                                                                                                          | Regimen 2, 0/34 (0.0)                                                           | Regimen 2, 0/34 (0.0)                                                           |                                |                               | Regimen 2, 1/34 (2.9)                                                           | Regimen 2, 0/34 (0.0)                                                           |

(Continued)

**Table S29—Continued**

| Country, Study/Year                                        | Number of Patients and Pregnancies | Population                                                                                                      | Treatment Regimens                                                                                                                                                                                        | Congenital Malformations, n/N (%)     | Fetal and/or Neonatal Hemorrhage, n/N (%)                                            | Total Pregnancy Loss, n/N (%) | Early Pregnancy Loss, n/N (%) | Late Pregnancy Loss, n/N (%)                                            | Neonatal Death                                           |
|------------------------------------------------------------|------------------------------------|-----------------------------------------------------------------------------------------------------------------|-----------------------------------------------------------------------------------------------------------------------------------------------------------------------------------------------------------|---------------------------------------|--------------------------------------------------------------------------------------|-------------------------------|-------------------------------|-------------------------------------------------------------------------|----------------------------------------------------------|
| Single-group cohort studies                                |                                    |                                                                                                                 |                                                                                                                                                                                                           |                                       |                                                                                      |                               |                               |                                                                         |                                                          |
| Norway, retrospective, Abildgaard et al <sup>7</sup> /2009 | 11 women<br>12 pregnancies         | Pregnant women with mechanical heart valves<br>Valve position<br>Mitral: 4<br>Aortic: 6<br>Aortic and mitral: 2 | Therapeutic doses of LMWH q12h throughout pregnancy<br>Aspirin 75 mg/d recommended but discontinued 1 wk before expected delivery date<br>Doses adjusted to attain peak anti-Xa level of 0.7-1.2 units/mL | 1/12 (8.3) (patent ductus arteriosus) | Not reported                                                                         | 0/12 (0.0)                    | 0/12 (0.0%)                   | 0/12 (0.0)                                                              | 0/12 (0.0)                                               |
| Japan, retrospective, Kawamata et al <sup>7</sup> /2007    | 12 women<br>16 pregnancies         | Pregnant women with mechanical heart valves<br>Valve position<br>Mitral: 7<br>Aortic: 2<br>Tricuspid: 7         | Substitution of warfarin with UFH starting between 6 and 13 wk and until term<br>Doses adjusted to maintain aPTT levels 2-3 times control (between 20,000 and 30,000 International Units/d)               | 1/16 (6.3) (hydrocephalus)            | 2/16 (12.5) (intraventricular hemorrhage, intraventricular and pulmonary hemorrhage) | 5/16 (31.3)                   | 4/16 (25)                     | 1/16 (8.3) (intrauterine fetal death during extracorporeal circulation) | 2/16 (12.5) (see under Fetal and/or Neonatal Hemorrhage) |

(Continued)

Table S29—Continued

| Country, Study/Year                                   | Number of Patients and Pregnancies | Population                                                                                                                                                  | Treatment Regimens                                                                                                                                                     | Congenital Malformations, n/N (%) | Fetal and/or Neonatal Hemorrhage, n/N (%) | Total Pregnancy Loss, n/N (%)  | Early Pregnancy Loss, n/N (%) | Late Pregnancy Loss, n/N (%) | Neonatal Death |
|-------------------------------------------------------|------------------------------------|-------------------------------------------------------------------------------------------------------------------------------------------------------------|------------------------------------------------------------------------------------------------------------------------------------------------------------------------|-----------------------------------|-------------------------------------------|--------------------------------|-------------------------------|------------------------------|----------------|
| England, prospective, Quinn et al <sup>72</sup> /2009 | 11 women<br>12 pregnancies         | Pregnant women with mechanical heart valves<br>Valve position<br>Mitral: 4<br>Aortic :2<br>Aortic and mitral: 3<br>Systemic right atrioventricular valve: 2 | Dalteparin 100 International Units/kg q12h (8) or enoxaparin 1 mg/kg q12h (4) + aspirin 81 mg/d<br>Doses adjusted to attain an anti-Xa level 1.0-1.2 units/mL          | Not reported                      | Not reported                              | 1/12 (8.3)                     | 0/12 (0.0)                    | 1/12 (8.3)                   | 0/12 (0.0)     |
| Canada, prospective, Yinon et al <sup>73</sup> /2009  | 17 women<br>23 pregnancies         | Pregnant women with mechanical heart valves<br>Valve position<br>Mitral: 14<br>Aortic: 8<br>Aortic and mitral: 1                                            | LMWH SC q12h<br>Low-dose aspirin (81 mg/d) administered to all patients<br>LWMH dose adjusted to maintain 4 h postinjection anti-Xa level 1-1.2 International Units/mL | 0/23 (0.0)                        | Not reported                              | Total pregnancy loss: 4 (17.4) | 2/23 (8.7)                    | 2/23 (8.7)                   | 1/12 (4.3)     |

(Continued)



**Table S29—Continued**

| Country/<br>Study/Year      | Number of<br>Patients and<br>Pregnancies | Population                                                                                                                                                                                                                               | Treatment Regimens                                                                                                                                                                                                    | Congenital<br>Malformations,<br>n/N (%)                                                                                           | Fetal and/or<br>Neonatal<br>Hemorrhage,<br>n/N (%) | Total<br>Pregnancy<br>Loss,<br>n/N (%)                                                                                                                     | Early<br>Pregnancy<br>Loss,<br>n/N (%)                                                                                                                           | Late<br>Pregnancy<br>Loss,<br>n/N (%) | Neonatal Death |
|-----------------------------|------------------------------------------|------------------------------------------------------------------------------------------------------------------------------------------------------------------------------------------------------------------------------------------|-----------------------------------------------------------------------------------------------------------------------------------------------------------------------------------------------------------------------|-----------------------------------------------------------------------------------------------------------------------------------|----------------------------------------------------|------------------------------------------------------------------------------------------------------------------------------------------------------------|------------------------------------------------------------------------------------------------------------------------------------------------------------------|---------------------------------------|----------------|
| Canada, Chan<br>et al./2000 | 976 women<br>1,234<br>pregnancies        | Studies between<br>1966-1997<br>involving<br>pregnant<br>women with<br>mechanical<br>heart valves:<br>Valve type<br>Cage and<br>ball: 433<br>Single-tilting<br>disc: 356<br>Bileaflet: 62<br>Other: 20<br>Heterograft: 1<br>Unknown: 104 | Regimen 1 oral<br>anticoagulants<br>throughout<br>pregnancy<br>Regimen 2 substitution<br>of UFH in the first<br>trimester either<br>at or before 6 wk,<br>after 6 wk, or at<br>unknown time<br>in the first trimester | Regimen 1,<br>35/549 (6.4)<br><br>Regimen 2,<br>6/174 (3.4)<br>≤ 6 wk: 0/108 (0)<br>> 6 wk: 4/36 (11.1)<br>Unknown:<br>2/30 (6.7) | Not reported                                       | Regimen 1,<br>266/792<br>(33.6%)<br><br>Regimen 2,<br>61/230 (26.5)<br>≤ 6 wk: 21/129<br>(16.3)<br>> 6 wk: 20/56<br>(35.37)<br>Unknown:<br>20/45<br>(44.4) | Regimen 1,<br>196/792<br>(24.7)<br><br>Regimen 2,<br>57/230<br>(24.8)<br>≤ 6 w:<br>19/129<br>(14.7)<br>> 6 wk:<br>19/56<br>(33.9)<br>Unknown:<br>19/45<br>(42.2) | Not specified                         | Not specified  |
|                             |                                          | Position<br>Mitral: 647<br>Aortic: 202<br>Tricuspid: 1<br>> 1 valve: 126<br>Valve position<br>Mitral: 647<br>Aortic: 202<br>Tricuspid: 1<br>> 1 valve: 126<br>Total: 976                                                                 | Regimen 3 UFH<br>throughout<br>pregnancy, adjusted<br>dose, or low dose<br>(≤ 15,000 units/d)                                                                                                                         | Regimen 3,<br>0/12 (0)<br>Adjusted dose:<br>0/12 (0)<br>Low dose: 0/5 (0)                                                         |                                                    | Regimen 3,<br>9/21 (42.9)<br>Adjusted<br>dose:<br>7/16<br>(43.8)<br>Low-dose:<br>2/5 (40)                                                                  | Regimen 3,<br>5/21<br>(23.8)<br>Adjusted<br>dose:<br>4/16 (25)<br>Low-dose:<br>1/5 (20)                                                                          |                                       |                |

(Continued)

**Table S29—Continued**

| Country, Study/Year | Number of Patients and Pregnancies | Population | Treatment Regimens                                                       | Congenital Malformations, n/N (%)                                                                                                                                                                                                                                                                                | Fetal and/or Neonatal Hemorrhage, n/N (%)                                    | Total Pregnancy Loss, n/N (%)                                               | Early Pregnancy Loss, n/N (%) | Late Pregnancy Loss, n/N (%) | Neonatal Death |
|---------------------|------------------------------------|------------|--------------------------------------------------------------------------|------------------------------------------------------------------------------------------------------------------------------------------------------------------------------------------------------------------------------------------------------------------------------------------------------------------|------------------------------------------------------------------------------|-----------------------------------------------------------------------------|-------------------------------|------------------------------|----------------|
|                     |                                    |            | Regimen 4, no anticoagulants, including use of antiplatelet agents alone | Regimen 4, 3/92 (3.3)<br>Nothing: 2/33 (6.1)<br>Antiplatelet: 1/59 (1.7)<br>Malformations include warfarin embryopathy (29), CNS abnormalities (4), cleft lip and cleft palate (4), left ventricular hypoplasia (1), corneal leukoma (1), bilateral hand polydactyly (1), single kidney-toe-finger deformity (1) | Regimen 4, 20/102 (19.6)<br>Nothing: 7/35 (20)<br>Antiplatelet: 13/67 (19.4) | Regimen 4, 10/102 (9.8)<br>Nothing: 2/35 (5.7)<br>Antiplatelet: 8/67 (11.9) |                               |                              |                |

(Continued)

**Table S29—Continued**

| Country, Study/Year                            | Number of Pregnancies      | Population                                                                                            | Treatment Regimens                                                                                                                                                                                                                                                                                                        | Congenital Malformations, n/N (%)                                                                | Fetal and/or Neonatal Hemorrhage, n/N (%) | Total Pregnancy Loss, n/N (%)                                                                     | Early Pregnancy Loss, n/N (%)                                             | Late Pregnancy Loss, n/N (%)                                                                                                     | Neonatal Death |
|------------------------------------------------|----------------------------|-------------------------------------------------------------------------------------------------------|---------------------------------------------------------------------------------------------------------------------------------------------------------------------------------------------------------------------------------------------------------------------------------------------------------------------------|--------------------------------------------------------------------------------------------------|-------------------------------------------|---------------------------------------------------------------------------------------------------|---------------------------------------------------------------------------|----------------------------------------------------------------------------------------------------------------------------------|----------------|
| United States, James et al <sup>67</sup> /2006 | 76 pregnancies             | Studies between 1966 and 2006 involving pregnant women with mechanical heart valves receiving LMWH    | Conversion to LMWH prior to pregnancy or by the end of first trimester<br>LMWH<br>Enoxaparin: 32<br>Nadroparin: 20<br>Dalteparin: 13<br>Tinzaparin: 2<br>Reviparin: 1<br>Unknown: 8<br>Addition of low-dose aspirin: 13<br>Varying regimens ranging from a fixed subtherapeutic dose to weight-adjusted therapeutic doses | 0/76 (0.0)                                                                                       | Not reported                              | 12 (15.8)                                                                                         | 8/76 (10.5)                                                               | 2/76 (2.6)<br>*Additional 2 demises secondary to fatal maternal valve thrombosis<br>**Not included elective termination at 14 wk | Not reported   |
| United States, Oran et al <sup>68</sup> /2004  | 75 women<br>81 pregnancies | Studies between 1989 and 2004 involving pregnant women with mechanical heart valves who received LMWH | Cases were included if LMWH was received during pregnancy irrespective of this type, dose, and duration and administration of different anticoagulant regimens other than LMWH during the same pregnancy                                                                                                                  | 1/81 (1.2)<br>(hydrocephalus, LMWH received during first trimester, warfarin subsequent to that) | Not reported                              | 9/81 (11.1)<br>Anti-Xa adjusted dose: 3/81 (3.7)<br>Fixed dose: 4/81 (4.9)<br>Unknown: 2/81 (3.7) | 6/81 (7.4)<br>Anti-Xa adjusted dose: 3/81 (3.7)<br>Fixed dose: 3/81 (3.7) | 3/81 (3.7)<br>Anti-Xa adjusted dose: 0/81 (0.0)<br>Fixed dose: 1/81 (1.2)<br>Unknown: 2/81 (3.7)                                 | Not reported   |

(Continued)

**Table S29—Continued**

| Country, Study/Year | Number of Patients and Pregnancies | Population           | Treatment Regimens                                                                                                            | Congenital Malformations, n/N (%) | Fetal and/or Neonatal Hemorrhage, n/N (%) | Total Pregnancy Loss, n/N (%) | Early Pregnancy Loss, n/N (%)                         | Late Pregnancy Loss, n/N (%) | Neonatal Death |
|---------------------|------------------------------------|----------------------|-------------------------------------------------------------------------------------------------------------------------------|-----------------------------------|-------------------------------------------|-------------------------------|-------------------------------------------------------|------------------------------|----------------|
|                     |                                    | Valve position       | Conversion to LMWH occurred 1 mo before conception in 2 women; in the remainder, conversion to LMWH occurred during pregnancy |                                   |                                           |                               |                                                       |                              |                |
|                     |                                    | Mitral: 44           |                                                                                                                               |                                   |                                           |                               |                                                       |                              |                |
|                     |                                    | Aortic: 8            |                                                                                                                               |                                   |                                           |                               |                                                       |                              |                |
|                     |                                    | Mitral and aortic: 5 |                                                                                                                               |                                   |                                           |                               |                                                       |                              |                |
|                     |                                    | Unknown: 18          |                                                                                                                               |                                   |                                           |                               |                                                       |                              |                |
|                     |                                    |                      | LMWH use during second half of first trimester and at term: 21                                                                |                                   |                                           |                               |                                                       |                              |                |
|                     |                                    |                      | LMWH throughout pregnancy: 60                                                                                                 |                                   |                                           |                               |                                                       |                              |                |
|                     |                                    |                      | LMWH enoxaparin: 35                                                                                                           |                                   |                                           |                               |                                                       |                              |                |
|                     |                                    |                      | Nadroparin: 21                                                                                                                |                                   |                                           |                               |                                                       |                              |                |
|                     |                                    |                      | Dalteparin: 11                                                                                                                |                                   |                                           |                               |                                                       |                              |                |
|                     |                                    |                      | Tinzaparin: 3                                                                                                                 |                                   |                                           |                               |                                                       |                              |                |
|                     |                                    |                      | Reviparin: 1                                                                                                                  |                                   |                                           |                               |                                                       |                              |                |
|                     |                                    |                      | Unknown: 10                                                                                                                   |                                   |                                           |                               |                                                       |                              |                |
|                     |                                    |                      | Dose adjusted to therapeutic anti-Xa level: 51                                                                                |                                   |                                           |                               |                                                       |                              |                |
|                     |                                    |                      | Fixed dose: 30                                                                                                                |                                   |                                           |                               |                                                       |                              |                |
|                     |                                    |                      |                                                                                                                               |                                   |                                           |                               | *Not included: 1 first trimester elective termination |                              |                |

(Continued)

**Table S29—Continued**

| Country, Study/Year                          | Number of Patients and Pregnancies | Population                                                                                                                                              | Treatment Regimens                                                                                                                                                                                                                                  | Congenital Malformations, n/N (%)                                                                                                                                           | Fetal and/or Neonatal Hemorrhage, n/N (%) | Total Pregnancy Loss, n/N (%)                                                                                                    | Early Pregnancy Loss, n/N (%)                                                                                                    | Late Pregnancy Loss, n/N (%) | Neonatal Death |
|----------------------------------------------|------------------------------------|---------------------------------------------------------------------------------------------------------------------------------------------------------|-----------------------------------------------------------------------------------------------------------------------------------------------------------------------------------------------------------------------------------------------------|-----------------------------------------------------------------------------------------------------------------------------------------------------------------------------|-------------------------------------------|----------------------------------------------------------------------------------------------------------------------------------|----------------------------------------------------------------------------------------------------------------------------------|------------------------------|----------------|
| Egypt, Hassouna and Allam <sup>2</sup> /2009 | 892 women<br>1,231 pregnancies     | Studies published between January 2000–September 2009 involving pregnant women with mechanical heart valves who received defined anticoagulant regimens | Regimen 1 VKAs throughout pregnancy with and without UFH or LMWH substitution near term<br>Regimen 2 UFH or LMWH substitution during the first trimester and near term<br>Regimen 3 UFH or LMWH throughout pregnancy<br>Regimen 4 no anticoagulants | Overall 22/942 (2.3)*<br>Regimen 1 21/559 (3.7)<br>Regimen 2 1/258 (0.4)                                                                                                    | Not reported                              | Overall 403/1343 (30)<br>Regimen 1 274/833 (32.9)<br>Regimen 2 64/322 (19.9)<br>Regimen 3 61/157 (38.8)<br>Regimen 4 4/31 (12.9) | Overall 272/1343 (20.2)<br>Regimen 1 194/833 (23.3)<br>Regimen 2 42/322 (13)<br>Regimen 3 34/157 (21.6)<br>Regimen 4 2/31 (12.9) | Not specified                | Not reported   |
|                                              |                                    | Valve type                                                                                                                                              |                                                                                                                                                                                                                                                     |                                                                                                                                                                             |                                           |                                                                                                                                  |                                                                                                                                  |                              |                |
|                                              |                                    | Cage and ball: 134<br>Tilting disc: 382<br>Bileaflet: 341<br>Undefined: 256                                                                             |                                                                                                                                                                                                                                                     |                                                                                                                                                                             |                                           |                                                                                                                                  |                                                                                                                                  |                              |                |
|                                              |                                    | Valve position                                                                                                                                          |                                                                                                                                                                                                                                                     |                                                                                                                                                                             |                                           |                                                                                                                                  |                                                                                                                                  |                              |                |
|                                              |                                    | Mitral: 671<br>Aortic: 141<br>Mitral and aortic: 147 + 147<br>Tricuspid: 7                                                                              |                                                                                                                                                                                                                                                     |                                                                                                                                                                             |                                           |                                                                                                                                  |                                                                                                                                  |                              |                |
|                                              |                                    |                                                                                                                                                         |                                                                                                                                                                                                                                                     | *Includes hydrocephalus (4), nasal hypoplasia, epiphyseal stippling (7), strabismus (3), mental retardation (2), cleft lip/palate (2), telebrachydactyly (1), and other (3) |                                           |                                                                                                                                  |                                                                                                                                  |                              |                |

\* and \*\* denote additional data referring to the number of late losses two of 76 (2.6). See Tables S1, S4, and S17 for expansion of abbreviations.

## REFERENCES

- Chan WS, Anand S, Ginsberg JS. Anticoagulation of pregnant women with mechanical heart valves: a systematic review of the literature. *Arch Intern Med*. 2000;160(2):191-196.
- Hassouna A, Allam H. Anticoagulation of pregnant women with mechanical heart valve prosthesis: a systematic review of the literature (2000-2009). *J Coagul Disorders*. 2010;2(1): 81-88.
- Askie LM, Duley L, Henderson-Smart DJ, Stewart LA; PARIS Collaborative Group. Antiplatelet agents for prevention of pre-eclampsia: a meta-analysis of individual patient data. *Lancet*. 2007;369(9575):1791-1798.
- Kozer E, Nikfar S, Costei A, Boskovic R, Nulman I, Koren G. Aspirin consumption during the first trimester of pregnancy and congenital anomalies: a meta-analysis. *Am J Obstet Gynecol*. 2002;187(6):1623-1630.
- Kozer E, Costei AM, Boskovic R, Nulman I, Nikfar S, Koren G. Effects of aspirin consumption during pregnancy on pregnancy outcomes: meta-analysis. *Birth Defects Res B Dev Reprod Toxicol*. 2003;68(1):70-84.
- Orme ML, Lewis PJ, de Swiet M, et al. May mothers given warfarin breast-feed their infants? *BMJ*. 1977;1(6076): 1564-1565.
- McKenna R, Cole ER, Vasan U. Is warfarin sodium contraindicated in the lactating mother? *J Pediatr*. 1983;103(2): 325-327.
- Houwert-de Jong M, Gerards LJ, Tetteroo-Tempelman CA, de Wolff FA. May mothers taking acenocoumarol breast feed their infants? *Eur J Clin Pharmacol*. 1981;21(1):61-64.
- Fondevila CG, Meschengieser S, Blanco A, Peñalva L, Lazzari MA. Effect of acenocoumarin on the breast-fed infant. *Thromb Res*. 1989;56(1):29-36.
- Richter C, Sitzmann J, Lang P, Weitzel H, Huch A, Huch R. Excretion of low molecular weight heparin in human milk. *Br J Clin Pharmacol*. 2001;52(6):708-710.
- Ito S, Blajchman A, Stephenson M, Eliopoulos C, Koren G. Prospective follow-up of adverse reactions in breast-fed infants exposed to maternal medication. *Am J Obstet Gynecol*. 1993; 168(5):1393-1399.
- Delvigne A, Demoulin A, Smitz J, et al. The ovarian hyperstimulation syndrome in in-vitro fertilization: a Belgian multicentric study. I. Clinical and biological features. *Hum Reprod*. 1993;8(9):1353-1360.
- Aurousseau MH, Samama MM, Belhassen A, Herve F, Hugues JN. Risk of thromboembolism in relation to an in-vitro fertilization programme: three case reports. *Hum Reprod*. 1995;10(1):94-97.
- Morris RS, Miller C, Jacobs L, Miller K. Conservative management of ovarian hyperstimulation syndrome. *J Reprod Med*. 1995;40(10):711-714.
- Bergh T, Lundkvist O. Clinical complications during in-vitro fertilization treatment. *Hum Reprod*. 1992;7(5):625-626.
- Jacobsen AF, Skjeldestad FE, Sandset PM. Ante- and post-natal risk factors of venous thrombosis: a hospital-based case-control study. *J Thromb Haemost*. 2008;6(6):905-912.
- Ragni G, Scarduelli C, Calanna G, Santi G, Benaglia L, Somigliana E. Blood loss during transvaginal oocyte retrieval. *Gynecol Obstet Invest*. 2009;67(1):32-35.
- Bennett SJ, Waterstone JJ, Cheng WC, Parsons J. Complications of transvaginal ultrasound-directed follicle aspiration: a review of 2760 consecutive procedures. *J Assist Reprod Genet*. 1993;10(+):72-77.
- Dicker D, Ashkenazi J, Feldberg D, Levy T, Dekel A, Ben-Rafael Z. Severe abdominal complications after transvaginal ultrasonographically guided retrieval of oocytes for in vitro fertilization and embryo transfer. *Fertil Steril*. 1993; 59(6):1313-1315.
- Tureck RW, García CR, Blasco L, Mastroianni L Jr. Perioperative complications arising after transvaginal oocyte retrieval. *Obstet Gynecol*. 1993;81(4):590-593.
- Govaerts I, Devreker F, Delbaere A, Revelard P, Englert Y. Short-term medical complications of 1500 oocyte retrievals for in vitro fertilization and embryo transfer. *Eur J Obstet Gynecol Reprod Biol*. 1998;77(2):239-243.
- Ludwig AK, Glawatz M, Griesinger G, Diedrich K, Ludwig M. Perioperative and post-operative complications of transvaginal ultrasound-guided oocyte retrieval: prospective study of > 1000 oocyte retrievals. *Hum Reprod*. 2006;21(12): 3235-3240.
- Bodri D, Guillén JJ, Polo A, Trullenque M, Esteve C, Coll O. Complications related to ovarian stimulation and oocyte retrieval in 4052 oocyte donor cycles. *Reprod Biomed Online*. 2008;17(2):237-243.
- Baber R, Porter R, Picker R, Robertson R, Dawson E, Saunders D. Transvaginal ultrasound directed oocyte collection for in vitro fertilization: successes and complications. *J Ultrasound Med*. 1988;7(7):377-379.
- Yinon Y, Pauzner R, Dulitzky M, Elizur SE, Dor J, Shulman A. Safety of IVF under anticoagulant therapy in patients at risk for thrombo-embolic events. *Reprod Biomed Online*. 2006;12(3):354-358.
- Qublan H, Amarín Z, Dabbas M, et al. Low-molecular-weight heparin in the treatment of recurrent IVF-ET failure and thrombophilia: a prospective randomized placebo-controlled trial. *Hum Fertil*. 2008;11(4):246-253.
- Stern C, Chamley L, Norris H, Hale L, Baker HW. A randomized, double-blind, placebo-controlled trial of heparin and aspirin for women with in vitro fertilization implantation failure and antiphospholipid or antinuclear antibodies. *Fertil Steril*. 2003;80(2):376-383.
- Jacobsen AF, Drolsum A, Klow NE, Dahl GF, Qvigstad E, Sandset PM. Deep vein thrombosis after elective cesarean section. *Thromb Res*. 2004;113(5):283-288.
- Lindqvist P, Dahlbäck B, Maršál K. Thrombotic risk during pregnancy: a population study. *Obstet Gynecol*. 1999; 94(4):595-599.
- Simpson EL, Lawrenson RA, Nightingale AL, Farmer RD. Venous thromboembolism in pregnancy and the puerperium: incidence and additional risk factors from a London perinatal database. *BJOG*. 2001;108(1):56-60.
- Knight M; UKOSS. Antenatal pulmonary embolism: risk factors, management and outcomes. *BJOG*. 2008;115(4): 453-461.
- Robertson L, Wu O, Langhorne P, et al; Thrombosis Risk and Economic Assessment of Thrombophilia Screening (TREATS) Study. Thrombophilia in pregnancy: a systematic review. *Br J Haematol*. 2005;132(2):171-196.
- James AH, Jamison MG, Brancaccio LR, Myers ER. Venous thromboembolism during pregnancy and the postpartum period: incidence, risk factors, and mortality. *Am J Obstet Gynecol*. 2006;194(5):1311-1315.
- Casele H, Grobman WA. Cost-effectiveness of thromboprophylaxis with intermittent pneumatic compression at cesarean delivery. *Obstet Gynecol*. 2006;108(3 pt 1):535-540.
- Howell R, Fidler J, Letsky E, de Swiet M. The risks of antenatal subcutaneous heparin prophylaxis: a controlled trial. *Br J Obstet Gynaecol*. 1983;90(12):1124-1128.
- Lao TT, de Swiet M, Letsky SE, Walters BN. Prophylaxis of thromboembolism in pregnancy: an alternative. *Br J Obstet Gynaecol*. 1985;92(3):202-206.
- de Swiet M, Floyd E, Letsky E. Low risk of recurrent thromboembolism in pregnancy. *Br J Hosp Med*. 1987;38(3):264.
- Brill-Edwards P, Ginsberg JS, Gent M, et al; Recurrence of Clot in This Pregnancy Study Group. Safety of withholding

- heparin in pregnant women with a history of venous thromboembolism. *N Engl J Med*. 2000;343(20):1439-1444.
39. Badaracco MA, Vessey MP. Recurrence of venous thromboembolic disease and use of oral contraceptives. *BMJ*. 1974;1(5901):215-217.
  40. Tengborn L, Bergqvist D, Mätzsch T, Bergqvist A, Hedner U. Recurrent thromboembolism in pregnancy and puerperium. Is there a need for thromboprophylaxis? *Am J Obstet Gynecol*. 1989;160(1):90-94.
  41. Pabinger I, Grafenhofer H, Kaider A, et al. Risk of pregnancy-associated recurrent venous thromboembolism in women with a history of venous thrombosis. *J Thromb Haemost*. 2005;3(5):949-954.
  42. De Stefano V, Martinelli I, Rossi E, et al. The risk of recurrent venous thromboembolism in pregnancy and puerperium without antithrombotic prophylaxis. *Br J Haematol*. 2006;135(3):386-391.
  43. Gates S, Brocklehurst P, Ayers S, Bowler U; Thromboprophylaxis in Pregnancy Advisory Group. Thromboprophylaxis and pregnancy: two randomized controlled pilot trials that used low-molecular-weight heparin. *Am J Obstet Gynecol*. 2004;191(4):1296-1303.
  44. Pettilä V, Kaaja R, Leinonen P, Ekblad U, Kataja M, Ikkala E. Thromboprophylaxis with low molecular weight heparin (dalteparin) in pregnancy. *Thromb Res*. 1999;96(4):275-282.
  45. Blombäck M, Bremme K, Hellgren M, Siegbahn A, Lindberg H. Thromboprophylaxis with low molecular mass heparin, 'Fragmin' (dalteparin), during pregnancy—a longitudinal safety study. *Blood Coagul Fibrinolysis*. 1998;9(1):1-9.
  46. Brennan JE, Walker ID, Greer IA. Anti-activated factor X profiles in pregnant women receiving antenatal thromboprophylaxis with enoxaparin. *Acta Haematol*. 1999;101(1):53-55.
  47. Bauersachs RM, Dudenhausen J, Faridi A, et al; ETHIG Investigators. Risk stratification and heparin prophylaxis to prevent venous thromboembolism in pregnant women. *Thromb Haemost*. 2007;98(6):1237-1245.
  48. Dargaud Y, Rugeri L, Vergnes MC, et al. A risk score for the management of pregnant women with increased risk of venous thromboembolism: a multicentre prospective study. *Br J Haematol*. 2009;145(6):825-835.
  49. Folkeringa N, Brouwer JL, Korteweg FJ, Veeger NJ, Erwich JJ, van der Meer J. High risk of pregnancy-related venous thromboembolism in women with multiple thrombophilic defects. *Br J Haematol*. 2007;138(1):110-116.
  50. Rozanski C, Lazo-Langner A, Kovacs M. Prevention of venous thromboembolism (VTE) associated with pregnancy in women with a past history of VTE [abstract]. *Blood*. 2009;114(suppl):3132.
  51. Sanson BJ, Lensing AWA, Prins MH, et al. Safety of low-molecular-weight heparin in pregnancy: a systematic review. *Thromb Haemost*. 1999;81(5):668-672.
  52. Lepercq J, Conard J, Borel-Derlon A, et al. Venous thromboembolism during pregnancy: a retrospective study of enoxaparin safety in 624 pregnancies. *BJOG*. 2001;108(11):1134-1140.
  53. Cowchock S, Reece EA. Do low-risk pregnant women with antiphospholipid antibodies need to be treated? Organizing Group of the Antiphospholipid Antibody Treatment Trial. *Am J Obstet Gynecol*. 1997;176(5):1099-1100.
  54. Tulpala M, Marttunen M, Söderstrom-Anttila V, et al. Low-dose aspirin in prevention of miscarriage in women with unexplained or autoimmune related recurrent miscarriage: effect on prostacyclin and thromboxane A2 production. *Hum Reprod*. 1997;12(7):1567-1572.
  55. Pattison NS, Chamley LW, Birdsall M, Zanderigo AM, Liddell HS, McDougall J. Does aspirin have a role in improving pregnancy outcome for women with the antiphospholipid syndrome? A randomized controlled trial. *Am J Obstet Gynecol*. 2000;183(4):1008-1012.
  56. Rai R, Cohen H, Dave M, Regan L. Randomised controlled trial of aspirin and aspirin plus heparin in pregnant women with recurrent miscarriage associated with phospholipid antibodies (or antiphospholipid antibodies). *BMJ*. 1997;314(7076):253-257.
  57. Goel N, Tuli A, Choudhry R. The role of aspirin versus aspirin and heparin in cases of recurrent abortions with raised anticardiolipin antibodies. *Med Sci Monit*. 2006;12(3):CR132-CR136.
  58. Kutteh WH. Antiphospholipid antibody-associated recurrent pregnancy loss: treatment with heparin and low-dose aspirin is superior to low-dose aspirin alone. *Am J Obstet Gynecol*. 1996;174(5):1584-1589.
  59. Farquharson RG, Quenby S, Greaves M. Antiphospholipid syndrome in pregnancy: a randomized, controlled trial of treatment. *Obstet Gynecol*. 2002;100(3):408-413.
  60. Laskin CA, Spitzer KA, Clark CA, et al. Low molecular weight heparin and aspirin for recurrent pregnancy loss: results from the randomized, controlled HepASA Trial. *J Rheumatol*. 2009;36(2):279-287.
  61. Stephenson MD, Ballem PJ, Tsang P, et al. Treatment of antiphospholipid antibody syndrome (APS) in pregnancy: a randomized pilot trial comparing low molecular weight heparin to unfractionated heparin. *J Obstet Gynaecol Can*. 2004;26(8):729-734.
  62. Gris JC, Quéré I, Monpeyroux F, et al. Case-control study of the frequency of thrombophilic disorders in couples with late foetal loss and no thrombotic antecedent—the Nîmes Obstetricians and Haematologists Study5 (NOHA5). *Thromb Haemost*. 1999;81(6):891-899.
  63. Noble LS, Kutteh WH, Lashey N, Franklin RD, Herrada J. Antiphospholipid antibodies associated with recurrent pregnancy loss: prospective, multicenter, controlled pilot study comparing treatment with low-molecular-weight heparin versus unfractionated heparin. *Fertil Steril*. 2005;83(3):684-690.
  64. Kutteh WH, Ermel LD. A clinical trial for the treatment of antiphospholipid antibody-associated recurrent pregnancy loss with lower dose heparin and aspirin. *Am J Reprod Immunol*. 1996;35(4):402-407.
  65. Carp H, Dolitzky M, Inbal A. Thromboprophylaxis improves the live birth rate in women with consecutive recurrent miscarriages and hereditary thrombophilia. *J Thromb Haemost*. 2003;1(3):433-438.
  66. Leduc L, Dubois E, Takser L, Rey E, David MJ. Dalteparin and low-dose aspirin in the prevention of adverse obstetric outcomes in women with inherited thrombophilia. *J Obstet Gynaecol Can*. 2007;29(10):787-793.
  67. James AH, Brancaccio LR, Gehrig TR, Wang A, Ortel TL. Low-molecular-weight heparin for thromboprophylaxis in pregnant women with mechanical heart valves. *J Matern Fetal Neonatal Med*. 2006;19(9):543-549.
  68. Oran B, Lee-Parritz A, Ansell J. Low molecular weight heparin for the prophylaxis of thromboembolism in women with prosthetic mechanical heart valves during pregnancy. *Thromb Haemost*. 2004;92(4):747-751.
  69. Khamooshi AJ, Kashfi F, Hoseini S, Tabatabaei MB, Javadpour H, Noohi F. Anticoagulation for prosthetic heart valves in pregnancy. Is there an answer? *Asian Cardiovasc Thorac Ann*. 2007;15(6):493-496.
  70. Lee JH, Park NH, Keum DY, Choi SY, Kwon KY, Cho CH. Low molecular weight heparin treatment in pregnant women with a mechanical heart valve prosthesis. *J Korean Med Sci*. 2007;22(2):258-261.
  71. McLintock C, McCowan LME, North RA. Maternal complications and pregnancy outcome in women with mechanical prosthetic heart valves treated with enoxaparin. *BJOG*. 2009;116(12):1585-1592.

72. Abildgaard U, Sandset PM, Hammerstrøm J, Gjestvang FT, Tveit A. Management of pregnant women with mechanical heart valve prosthesis: thromboprophylaxis with low molecular weight heparin. *Thromb Res.* 2009;124(3):262-267.
73. Kawamata K, Neki R, Yamanaka K, et al. Risks and pregnancy outcome in women with prosthetic mechanical heart valve replacement. *Circ J.* 2007;71(2):211-213.
74. Quinn J, Von Klemperer K, Brooks R, Peebles D, Walker F, Cohen H. Use of high intensity adjusted dose low molecular weight heparin in women with mechanical heart valves during pregnancy: a single-center experience. *Haematologica.* 2009;94(11):1608-1612.
75. Yinon Y, Siu SC, Warshafsky C, et al. Use of low molecular weight heparin in pregnant women with mechanical heart valves. *Am J Cardiol.* 2009;104(9):1259-1263.
